# Supplementary material for: Competing endogenous RNA (ceRNA) hypothetic model based on comprehensive analysis of long non-coding RNA expression in lung adenocarcinoma
Source: PeerJ. 2019 Nov 7;7:e8024. doi: 10.7717/peerj.8024 (PMC6842565; doi:10.7717/peerj.8024)
Supplement: Supplemental Information 3 — |log2FC| >2, adjusted P value <0.01. [file peerj-07-8024-s003.xlsx]

## Sheet: Table S1  LUAD
lncRNA	logFC	logCPM	PValue	FDR
AC093110.1	-3.37756	7.9739	1.54349e-215	1.37309e-211
AL606469.1	-5.2189	5.78782	1.03906e-182	4.62172e-179
AL590226.1	-3.72194	6.07233	7.81226e-170	2.3166e-166
FENDRR	-3.98392	10.0414	1.90924e-155	4.24615e-152
LANCL1-AS1	-3.74269	6.97789	1.59183e-150	2.83219e-147
LINC00968	-3.59658	7.33059	2.13438e-139	3.16457e-136
AP001189.1	-3.09975	6.17485	7.32835e-129	9.31328e-126
AL445307.1	-3.50843	3.69802	6.45237e-128	7.17503e-125
AL109741.3	-2.90499	3.96841	1.89206e-127	1.8702e-124
LINC01082	-4.2064	4.20628	2.5429e-125	2.26216e-122
AC135012.3	-4.09475	4.92292	3.76889e-119	3.048e-116
MIR3945HG	-3.54156	6.76653	3.1517e-118	2.33646e-115
HID1-AS1	-2.80104	4.86673	6.38741e-111	4.37096e-108
AC018647.1	-2.80598	5.44588	1.91964e-109	1.2198e-106
LINC02016	-5.01435	5.61868	1.27867e-104	7.58335e-102
AC095050.1	-4.57139	3.83763	4.74759e-100	2.63966e-97
LINC01996	-4.49519	6.01123	2.17048e-98	1.1358e-95
LINC00656	-3.49662	4.2719	1.0784e-97	5.3297e-95
AC104984.1	-4.14139	3.50909	7.03896e-95	3.29571e-92
PCAT19	-2.42296	9.54959	3.49488e-93	1.55452e-90
AC011899.2	-2.39878	8.67792	1.41028e-91	5.97421e-89
AL109741.1	-2.52145	5.08319	2.09905e-90	8.48778e-88
AC104984.4	-4.10163	4.15047	3.38756e-90	1.31025e-87
AC026369.3	-3.3967	6.81794	7.43172e-90	2.75469e-87
AC128709.3	-4.29724	3.91862	2.6728e-89	9.51088e-87
AC084030.1	-4.42263	3.26907	2.1308e-88	7.29061e-86
AC087521.1	-2.764	5.76676	2.03006e-82	6.68867e-80
LINC01290	-2.27977	5.02868	5.067e-81	1.60986e-78
LINC00163	-3.44145	4.60223	7.39572e-81	2.2687e-78
AC010976.2	-3.10737	5.40608	9.09083e-77	2.58291e-74
AL135960.1	-2.65425	4.93601	9.29103e-77	2.58291e-74
SMIM25	-2.47209	10.7469	1.34443e-76	3.62426e-74
AC009806.1	-2.40484	3.93043	1.16614e-75	3.05118e-73
AC027288.3	-3.20111	7.98875	1.64035e-75	4.1693e-73
AP001189.3	-2.44869	6.17054	5.07314e-75	1.25363e-72
LINC01081	-3.14377	2.87903	2.57082e-74	6.1811e-72
AP000438.1	-3.01301	3.75053	6.46646e-73	1.51383e-70
ADAMTS9-AS1	-2.75225	7.09259	7.40129e-73	1.68825e-70
AC010776.3	-3.85868	2.8966	7.3736e-72	1.63989e-69
AC006273.1	-2.62387	4.81705	3.5805e-70	7.58385e-68
AL355974.2	-2.95663	4.88215	2.27191e-69	4.59339e-67
AC104237.3	-3.54935	3.70564	2.20493e-68	4.3589e-66
AC104237.2	-3.52986	3.38106	5.36888e-68	1.03829e-65
LINC00551	-3.08934	5.85623	1.27297e-67	2.35924e-65
AC125807.2	-2.10037	8.52857	3.7745e-67	6.85264e-65
AL445423.1	-2.41986	4.21442	1.15743e-66	2.01893e-64
TBX2-AS1	-2.13027	7.15475	1.30134e-66	2.2263e-64
LINC01936	-2.44232	8.74158	4.20217e-66	7.0533e-64
LINC01447	-3.0137	3.71746	9.67949e-66	1.56561e-63
AC004947.1	-3.04106	5.57045	2.78081e-65	4.34001e-63
AC119424.1	-3.5315	3.61908	8.86619e-65	1.35989e-62
MED4-AS1	-2.29795	4.5675	1.88686e-64	2.84501e-62
LINC01352	-2.3221	4.88113	4.74569e-64	7.03627e-62
AC011511.5	-2.61608	8.17142	7.47753e-64	1.09049e-61
LINC01977	4.7904	7.21207	1.92264e-63	2.75868e-61
LINC01197	-2.08415	6.3619	4.65599e-63	6.57455e-61
AC104211.2	-2.91809	3.64903	1.08737e-62	1.51145e-60
AC011899.3	-2.2234	4.94959	9.59822e-62	1.27442e-59
AC022509.2	-2.18894	5.90647	5.21944e-61	6.82825e-59
PACRG-AS3	-3.87493	3.86647	2.76113e-60	3.55985e-58
AL354714.1	-3.99021	5.24672	3.37964e-60	4.29504e-58
AC026992.2	-2.81461	6.63119	4.76957e-59	5.95924e-57
LINC01863	-3.25805	4.65448	4.82312e-59	5.95924e-57
FAM83A-AS1	6.54354	8.71724	6.33221e-59	7.71663e-57
AC044810.2	-3.35044	4.74786	1.07715e-58	1.29491e-56
AC018529.1	-2.62952	3.82393	1.57132e-58	1.86379e-56
AC019193.2	-2.30472	3.99773	1.67338e-58	1.95873e-56
AC068700.1	-2.38972	5.35756	5.64104e-58	6.51723e-56
LINC02014	3.97432	6.63549	1.18073e-57	1.3296e-55
Z82246.1	-3.45542	3.20353	5.99003e-57	6.66092e-55
PTPRD-AS1	-2.31004	5.5648	2.63923e-55	2.86325e-53
LINC00702	-2.25301	7.62283	3.80449e-55	4.07768e-53
AL591686.1	-3.18036	3.38464	5.57954e-54	5.909e-52
AL035409.1	-2.39618	4.83105	3.52571e-53	3.68996e-51
LINC01506	-2.4368	4.30549	4.05415e-52	4.19369e-50
LINC02154	-3.29531	7.17116	2.39168e-51	2.44557e-49
LINC01624	-2.32499	4.09321	8.36572e-51	8.45698e-49
AC112722.1	-2.17943	5.05749	1.10109e-50	1.10059e-48
AC005856.1	-2.01048	4.27747	1.59274e-50	1.57433e-48
AC025048.1	-2.52469	2.99973	2.7956e-50	2.73293e-48
AFAP1-AS1	6.35699	12.8877	3.05519e-50	2.95423e-48
LINC00891	-2.42955	5.21619	1.28907e-49	1.23307e-47
MNX1-AS1	5.21854	7.42873	1.37248e-49	1.29889e-47
PVT1	2.65305	10.5059	1.97336e-49	1.8479e-47
LINC00511	3.12768	11.2807	4.4244e-49	4.09994e-47
AC116312.1	-2.82249	3.19111	7.96564e-49	7.23085e-47
AC096531.2	-3.12088	6.28033	1.66484e-48	1.496e-46
AL445470.1	-2.64433	3.33085	5.36795e-48	4.77532e-46
AC004816.1	2.95823	8.74102	2.48607e-47	2.18971e-45
RUNDC3A-AS1	3.7354	7.37079	2.7668e-47	2.41309e-45
AC112206.2	-2.69809	6.34828	4.32961e-47	3.73943e-45
AL138737.1	-2.85315	3.1803	4.42829e-47	3.78789e-45
AP001453.2	3.46749	7.29486	2.98784e-46	2.43851e-44
AC005884.1	-2.38749	3.89	3.36468e-46	2.7211e-44
DDX11-AS1	2.42075	6.42672	4.40458e-46	3.53002e-44
ZFPM2-AS1	5.30686	8.53124	7.09975e-46	5.58933e-44
FGF10-AS1	-3.23909	2.86185	7.78185e-46	6.07257e-44
AC020907.1	5.78359	6.85458	9.98631e-46	7.72506e-44
LINC01572	2.87381	6.23029	1.57812e-45	1.19991e-43
AL355304.1	-2.38837	3.82314	2.51184e-45	1.89367e-43
Z98257.1	6.02497	10.0495	1.83988e-44	1.36231e-42
LINC01165	-2.49159	3.35315	1.85297e-44	1.36231e-42
PCAT6	2.68072	8.85127	1.89092e-44	1.37882e-42
LINC01270	2.85027	8.37408	3.92414e-44	2.81525e-42
AC068228.1	5.45515	5.10279	6.16336e-44	4.35153e-42
PARAL1	-2.97353	7.26609	7.70748e-44	5.3567e-42
AC004540.2	-2.05283	6.21018	1.86915e-43	1.27907e-41
AC116407.1	-2.03856	8.24319	2.65159e-43	1.80065e-41
AC080037.1	5.29998	7.46558	3.6423e-43	2.45469e-41
FEZF1-AS1	6.1241	9.52941	3.88687e-43	2.59982e-41
HLX-AS1	-2.30376	3.43415	4.24694e-43	2.81946e-41
NAV2-AS2	-2.76846	4.44288	4.71632e-43	3.10788e-41
AC027277.2	-2.36848	4.82882	1.14727e-42	7.50452e-41
AC004490.1	-2.14037	4.26384	1.32338e-42	8.5933e-41
LINC01070	-3.44519	2.7155	2.13828e-42	1.37767e-40
LINC00472	-2.15573	6.48645	2.15262e-42	1.37767e-40
AC026992.1	-2.40886	4.37367	2.50343e-42	1.59075e-40
AC069360.1	-2.2628	4.77592	3.06526e-42	1.93394e-40
AC147067.2	-2.01882	4.49885	8.97288e-42	5.62132e-40
FOXD3-AS1	6.90802	6.97682	2.29377e-41	1.41704e-39
AC134312.1	-2.59213	4.08102	2.45593e-41	1.50676e-39
C5orf64	-2.12692	3.47543	4.18405e-41	2.51495e-39
LINC01645	-2.68976	4.11444	4.78049e-41	2.85418e-39
AC025271.4	-2.23713	5.0296	8.11176e-41	4.81082e-39
LINC02570	-3.41499	3.71025	1.41818e-40	8.24581e-39
LINC02416	4.22034	5.5388	1.7159e-40	9.91208e-39
AP002856.2	-4.15389	5.37171	1.82233e-40	1.0459e-38
AL359378.1	-3.04213	2.85344	1.92231e-40	1.09621e-38
AC007182.1	-2.6938	3.92564	2.67934e-40	1.51818e-38
C1orf220	2.18981	6.17814	4.61311e-40	2.56489e-38
LINC00844	-2.90102	3.14266	1.8123e-39	9.952e-38
AC083837.1	-2.09029	6.76223	4.57881e-39	2.46867e-37
AL390036.1	-2.12814	4.49826	7.91948e-39	4.24408e-37
AC090796.1	-2.89634	4.25723	1.04194e-38	5.51734e-37
CADM3-AS1	-2.23642	6.11859	1.10381e-38	5.81034e-37
TFAP2A-AS1	3.04098	6.15781	1.11418e-38	5.83046e-37
AC145343.1	3.03345	6.95924	1.32086e-38	6.87158e-37
VPS9D1-AS1	2.92271	9.01386	1.72682e-38	8.87962e-37
LINC02104	-2.14148	4.0182	3.8919e-38	1.98979e-36
AC011294.1	4.90153	7.2331	9.34905e-38	4.69882e-36
LINC01985	-2.59275	3.17355	1.05451e-37	5.27016e-36
AL136369.1	-3.36882	3.82122	2.11627e-37	1.04013e-35
AC084880.3	-2.81537	3.14622	2.51209e-37	1.22789e-35
AL008628.1	-2.12511	3.1983	2.65041e-37	1.28842e-35
AF131215.7	-2.29078	4.312	2.94421e-37	1.42346e-35
AC105046.1	-2.35167	4.63073	3.4744e-37	1.67072e-35
DDN-AS1	2.58561	6.69483	3.95025e-37	1.88933e-35
LINC01271	2.57158	6.00657	4.70702e-37	2.23923e-35
LINC01703	2.35972	6.25284	5.1706e-37	2.44669e-35
AC090502.1	6.83631	6.68379	9.51068e-37	4.453e-35
AC105219.4	2.68026	6.87689	1.66637e-36	7.76127e-35
U62317.2	2.84318	8.58401	1.69447e-36	7.85107e-35
AC104257.1	-3.38633	3.35869	1.80459e-36	8.28265e-35
LINC00211	-2.30727	3.50431	1.80624e-36	8.28265e-35
LINC00857	2.32024	8.80864	2.40941e-36	1.09919e-34
BLACAT1	2.93655	8.98001	2.48452e-36	1.12767e-34
AGAP11	-2.07466	4.08201	4.6891e-36	2.11747e-34
AL157838.1	2.31331	7.38229	5.16097e-36	2.30713e-34
AC100793.4	-2.25206	3.87963	7.25453e-36	3.22682e-34
WASIR2	3.39333	5.89535	1.81472e-35	8.0317e-34
KC877392.1	-2.3933	2.87272	2.9006e-35	1.27741e-33
AC015921.1	3.15089	5.97579	3.04965e-35	1.32989e-33
AP003559.1	3.50923	6.29804	4.08791e-35	1.76534e-33
LINC01412	-2.19512	3.16857	4.76816e-35	2.04916e-33
AC010998.1	-2.82488	4.6403	7.99674e-35	3.40378e-33
AC133785.1	6.73262	6.16252	1.50457e-34	6.31352e-33
AL365356.5	5.11708	5.89544	4.0775e-34	1.67932e-32
AC007128.1	5.39402	6.49748	4.5224e-34	1.85397e-32
LINC00896	3.22951	6.34391	6.07643e-34	2.47963e-32
LINC02535	4.42093	6.09975	6.93349e-34	2.80365e-32
SNHG4	2.13977	7.98711	1.09525e-33	4.34972e-32
TDRKH-AS1	2.00952	6.87413	1.43585e-33	5.67704e-32
AC092691.1	-2.97826	4.37964	1.44368e-33	5.68275e-32
Z84485.1	2.19396	6.4542	1.80622e-33	7.07847e-32
LINC01616	-3.18237	3.15403	2.2009e-33	8.54985e-32
AL365356.4	4.45641	5.62393	2.46996e-33	9.55338e-32
AC009065.2	3.88929	7.73261	7.37623e-33	2.78046e-31
AC244153.1	-2.38381	6.96278	7.99792e-33	3.00209e-31
AC007671.1	-2.06204	4.17742	8.52893e-33	3.18796e-31
AL391056.1	4.37017	8.4628	1.09374e-32	4.07108e-31
AC015849.5	3.63671	5.84994	1.34024e-32	4.96781e-31
BBOX1-AS1	5.5714	7.64006	1.75521e-32	6.479e-31
AL121832.3	2.17638	6.53638	1.88861e-32	6.9426e-31
AC013731.1	2.06311	5.14139	1.91514e-32	7.01115e-31
AC092834.1	-2.83769	3.21227	2.14355e-32	7.75162e-31
AC084864.1	3.18635	4.08857	3.12891e-32	1.11786e-30
AL161740.1	-3.15983	2.89527	4.1126e-32	1.46343e-30
AC009065.5	3.99385	7.60969	5.35816e-32	1.89905e-30
AC002398.2	-2.43954	2.90897	1.02143e-31	3.5634e-30
LINC02332	3.88658	4.1465	1.11509e-31	3.87495e-30
LINC01426	2.46778	9.12844	1.89025e-31	6.46757e-30
AL133215.2	2.00909	5.4154	1.9651e-31	6.6979e-30
AC010719.1	2.81493	6.68774	2.77223e-31	9.37708e-30
PGM5-AS1	-2.33641	3.78626	3.35955e-31	1.13207e-29
AC016205.1	3.84069	6.55495	3.86343e-31	1.29695e-29
AP001189.5	-2.19389	2.90502	4.40565e-31	1.47341e-29
AC027228.2	3.86591	7.47319	1.19248e-30	3.9145e-29
LINC00862	3.74689	6.17072	1.42842e-30	4.67176e-29
LINC01614	3.71649	7.71382	1.4472e-30	4.7123e-29
AC105384.1	-2.04147	4.02046	1.4567e-30	4.7123e-29
AC025580.1	4.04988	8.61173	1.88109e-30	6.06311e-29
NPSR1-AS1	5.69789	5.11212	2.01188e-30	6.46125e-29
AL645608.9	3.91892	5.50338	2.50804e-30	7.96841e-29
CLDN10-AS1	6.48088	7.46899	2.75335e-30	8.71665e-29
AL354719.2	4.01768	8.18926	3.49816e-30	1.09576e-28
AL139412.1	4.15416	5.50954	4.44258e-30	1.38671e-28
SLC2A1-AS1	2.33229	6.58259	1.10003e-29	3.42163e-28
AC020663.2	2.53035	5.69456	1.53765e-29	4.74963e-28
AL365181.3	4.4691	10.394	1.59897e-29	4.92196e-28
FO393415.1	-2.36157	3.89635	1.96509e-29	6.0281e-28
AL354707.1	2.97342	7.70681	2.33952e-29	7.15202e-28
AC138904.1	3.12664	6.38683	2.71183e-29	8.2618e-28
AC026250.1	2.15885	6.38248	2.87892e-29	8.74091e-28
AP005233.2	6.05475	6.35558	3.18666e-29	9.64237e-28
CYP4A22-AS1	2.51346	5.14047	3.99075e-29	1.19534e-27
AL354861.3	-2.4311	3.31871	4.4742e-29	1.33565e-27
AL365181.2	5.32898	9.0161	5.62443e-29	1.67341e-27
LINC01711	3.81729	5.14277	6.82892e-29	2.00495e-27
AC092115.3	2.81339	5.13299	1.14702e-28	3.33459e-27
AC007128.2	6.02668	4.94439	1.22398e-28	3.54675e-27
AL096865.1	2.15068	5.59839	1.43402e-28	4.12851e-27
AL135902.2	-2.36252	2.67214	1.96679e-28	5.62592e-27
C2orf48	2.94505	6.07806	2.02468e-28	5.77294e-27
AC099850.3	2.45237	7.75344	2.72357e-28	7.71621e-27
AP000553.2	2.81476	4.99111	3.72094e-28	1.04421e-26
AC025470.2	-2.39916	2.94326	4.39038e-28	1.2282e-26
AC245041.2	-2.43399	8.24536	4.9745e-28	1.3786e-26
LINC01460	3.84741	6.97381	5.02283e-28	1.38767e-26
LINC02159	4.16459	7.60394	5.55553e-28	1.53009e-26
AL031599.1	-2.44585	3.04476	7.32504e-28	2.00503e-26
MGAT3-AS1	-2.44519	3.66695	1.32842e-27	3.62503e-26
DGCR9	3.02427	7.45546	2.36083e-27	6.40304e-26
SEMA6A-AS2	-2.05141	2.64931	2.53301e-27	6.84913e-26
AP003469.2	2.72937	5.42955	3.98308e-27	1.0705e-25
AP003064.2	-2.46972	4.54111	4.70754e-27	1.24638e-25
AC091057.4	2.28188	4.8062	5.31037e-27	1.3958e-25
LINC02362	2.57795	7.97756	5.31897e-27	1.3958e-25
AC024257.1	-2.20682	3.68411	5.34662e-27	1.39893e-25
AL079303.1	3.33781	7.06897	5.37533e-27	1.40231e-25
AC007639.1	3.51061	4.17679	5.55542e-27	1.44506e-25
AL445524.1	2.82534	9.75763	5.67895e-27	1.47288e-25
LINC00942	6.59466	9.7987	6.58176e-27	1.69714e-25
AC097358.2	3.05142	3.99418	7.22973e-27	1.85883e-25
AC104260.1	-2.16889	2.62841	8.00389e-27	2.05195e-25
KCNMB2-AS1	5.51238	7.73737	8.19389e-27	2.09462e-25
AC022784.1	4.57596	7.12202	9.11528e-27	2.31684e-25
AL138760.1	5.26862	5.07536	1.22336e-26	3.09178e-25
AC012349.1	-2.45023	3.50073	1.30675e-26	3.28385e-25
AC097537.1	-3.11743	2.63553	1.3114e-26	3.28626e-25
AC013457.1	-3.1536	6.94563	1.68199e-26	4.20309e-25
AL354714.3	-2.8687	4.24297	1.82068e-26	4.53691e-25
SLC12A9-AS1	2.17575	5.62904	1.95099e-26	4.84805e-25
AL590666.2	3.79484	7.76539	2.16682e-26	5.36937e-25
AL096828.3	2.03049	5.6799	3.0969e-26	7.63159e-25
AC009005.1	2.12107	8.01114	3.49628e-26	8.5683e-25
HOXC-AS2	5.063	6.04064	3.70526e-26	9.03067e-25
AC090844.3	-2.17306	3.15675	4.36176e-26	1.05728e-24
AL353693.1	5.11339	4.83893	4.93791e-26	1.19369e-24
LINC01833	6.66356	7.4506	5.29601e-26	1.27333e-24
AC105206.1	-2.93095	4.23095	5.58348e-26	1.33883e-24
LINC01705	3.86504	5.25869	6.61927e-26	1.58293e-24
AC104024.2	3.34494	6.52	7.20013e-26	1.71722e-24
U62317.5	2.81964	6.68664	7.25683e-26	1.72612e-24
U52111.1	2.25208	6.08345	8.93143e-26	2.10753e-24
AP002957.1	4.15325	5.59184	8.99796e-26	2.11762e-24
LINC02473	4.12525	4.14996	9.83709e-26	2.30899e-24
AC005324.1	-2.92658	2.8693	1.11623e-25	2.60629e-24
LINC02544	3.56989	6.05003	1.44448e-25	3.33768e-24
LINC00629	3.45458	4.55747	1.56687e-25	3.61111e-24
AL163953.1	5.24591	4.13067	2.10577e-25	4.80331e-24
LINC01607	2.45895	6.5275	2.30374e-25	5.24144e-24
AC138393.3	2.08098	4.92721	8.21264e-25	1.81289e-23
AC008496.2	4.44549	6.27148	1.10409e-24	2.42518e-23
AC005256.1	6.79313	4.8722	1.12488e-24	2.45871e-23
AC010776.2	-2.73396	5.18175	1.56566e-24	3.3971e-23
LINC00628	3.60092	3.95583	1.78089e-24	3.84533e-23
AC007285.2	2.25992	4.30806	1.79119e-24	3.85822e-23
AC099066.2	2.9127	5.45646	1.82641e-24	3.92457e-23
AP003500.1	4.9021	5.16498	2.39796e-24	5.11566e-23
LINC02003	4.11073	4.17948	3.12873e-24	6.61121e-23
AC093904.4	3.7758	6.76191	3.3759e-24	7.09977e-23
AC236972.3	-2.51024	6.71527	3.47495e-24	7.27369e-23
LINC00887	3.9698	5.9259	3.56837e-24	7.4517e-23
AP002498.1	4.09237	6.82943	4.81188e-24	9.95499e-23
PGM5P4-AS1	-2.00253	4.03383	5.49858e-24	1.1323e-22
AC087392.2	-2.09807	3.75378	5.80779e-24	1.19321e-22
LINC00624	2.2241	7.08007	6.05877e-24	1.24191e-22
AC079089.1	3.18728	5.27669	6.29148e-24	1.28369e-22
LINC02474	4.73719	7.71329	7.08403e-24	1.42901e-22
AC106900.2	4.54982	5.0173	7.50376e-24	1.50844e-22
LINC00461	4.04298	4.55735	8.02392e-24	1.60767e-22
LINC02265	-2.05262	4.73429	9.84956e-24	1.96022e-22
AC093904.2	3.46947	4.99104	1.31908e-23	2.59614e-22
LINC00880	3.37852	6.05413	1.44379e-23	2.82907e-22
LINC00525	3.4187	5.46082	1.71373e-23	3.34328e-22
AL109615.3	2.92002	8.81077	1.96792e-23	3.81408e-22
AC079062.1	6.66205	9.68758	2.06749e-23	3.99834e-22
AL353152.1	-2.25611	3.39621	2.1774e-23	4.20177e-22
AC079467.1	-2.33947	7.28894	2.73692e-23	5.23605e-22
LINC01348	2.606	7.73117	2.91986e-23	5.56212e-22
F11-AS1	-2.27697	5.36973	3.15624e-23	5.96492e-22
AL158847.1	-2.29204	3.20297	3.84062e-23	7.22329e-22
AP000424.1	3.77516	4.2058	4.13815e-23	7.76645e-22
AC099509.1	3.66895	6.78049	5.02062e-23	9.36341e-22
AL365199.1	-2.06529	3.21665	5.16451e-23	9.59155e-22
AC120498.4	5.58816	5.0733	5.41863e-23	1.00425e-21
VAC14-AS1	2.52473	5.79762	6.7025e-23	1.22183e-21
AC090673.1	3.14839	6.26983	7.59202e-23	1.37834e-21
AC107959.3	2.30929	6.49405	1.43448e-22	2.56764e-21
AC011352.3	4.74901	3.84184	1.744e-22	3.11538e-21
MNX1-AS2	2.92251	5.30243	1.83305e-22	3.26791e-21
AF127936.2	2.99237	4.88328	2.07506e-22	3.68458e-21
LINC01993	2.77953	5.73997	2.22289e-22	3.93921e-21
AL033397.2	4.13967	6.03684	2.74893e-22	4.84247e-21
RMDN2-AS1	2.62241	5.86182	2.82323e-22	4.95375e-21
AC023301.1	4.28603	5.91119	2.86015e-22	5.00864e-21
LINC02081	2.93929	7.14347	3.17675e-22	5.55214e-21
AC004832.1	-2.21802	6.55185	3.35897e-22	5.84762e-21
AC111149.2	4.39088	7.12534	3.65735e-22	6.35465e-21
LINC01983	3.76018	6.33445	3.86419e-22	6.70094e-21
AL355312.4	2.74526	8.27529	4.78982e-22	8.27384e-21
LINC00665	2.3069	11.2029	4.91949e-22	8.48136e-21
AC078923.1	3.96894	5.72392	7.20022e-22	1.23179e-20
MYOSLID	3.4176	7.63323	7.61345e-22	1.29998e-20
AC005865.1	2.96434	5.29412	8.05604e-22	1.37292e-20
AC087269.1	3.8069	5.89569	9.62827e-22	1.63149e-20
AC093895.1	3.68364	6.20649	9.89555e-22	1.67359e-20
LINC00337	2.84762	6.17404	1.01611e-21	1.71523e-20
AC046195.1	-2.45579	7.10272	1.1154e-21	1.8722e-20
LINC01208	4.08908	3.82955	1.12644e-21	1.88716e-20
AP000251.1	3.41057	5.29291	1.23326e-21	2.05452e-20
STK32A-AS1	3.05489	6.8601	1.51373e-21	2.51703e-20
AC016877.3	3.1369	4.91233	1.75749e-21	2.90068e-20
TRIM31-AS1	2.40402	6.08254	1.91036e-21	3.14715e-20
AC233280.1	2.28136	4.27806	1.93746e-21	3.1819e-20
AL034399.2	4.20315	4.26222	2.10417e-21	3.44727e-20
FRGCA	3.69231	5.24124	2.17374e-21	3.54818e-20
AL138789.1	4.95233	4.36016	2.36687e-21	3.84228e-20
AC025031.4	2.16954	5.656	2.48507e-21	4.02681e-20
CASC16	4.23291	4.69173	2.6309e-21	4.25535e-20
AL049539.1	3.06776	3.92207	2.72046e-21	4.38427e-20
AL078587.1	2.42341	4.49487	2.72924e-21	4.39048e-20
AC079630.1	-2.03182	9.97991	2.75027e-21	4.41631e-20
AC010255.1	-2.03315	4.08129	2.95628e-21	4.73858e-20
LINC01765	-2.48817	5.51461	3.27266e-21	5.21748e-20
AL731533.2	2.23244	5.25553	3.49665e-21	5.54478e-20
AC226101.1	-2.09471	3.00308	3.92716e-21	6.19433e-20
AL772337.2	-2.77908	3.50739	4.28535e-21	6.74734e-20
LHFPL3-AS2	-2.20077	9.76333	4.68021e-21	7.31725e-20
AC061975.6	6.53729	5.83194	5.71661e-21	8.89072e-20
UCA1	5.68351	9.3822	6.57725e-21	1.01936e-19
LINC00160	3.56781	5.24996	7.3161e-21	1.12993e-19
LINC01827	-2.01677	4.04971	8.72277e-21	1.34485e-19
AC013264.1	-2.06609	6.82126	9.1975e-21	1.41559e-19
AL133153.2	2.43885	3.5885	1.24376e-20	1.89137e-19
AL645608.3	3.40606	5.53195	1.38059e-20	2.09585e-19
PACRG-AS1	-2.02385	3.11588	1.70323e-20	2.56377e-19
LINC02576	2.22179	5.78795	2.00955e-20	3.01467e-19
AL844908.1	2.79476	7.35049	2.16477e-20	3.2366e-19
AL139420.1	3.86769	3.67499	2.19452e-20	3.27558e-19
AL589765.6	2.18344	4.42753	2.32672e-20	3.46709e-19
AL590708.1	2.35642	4.60564	2.69029e-20	4.00214e-19
AC113346.1	4.26515	3.94498	3.12256e-20	4.62972e-19
AC239803.3	2.53833	4.15011	3.56115e-20	5.24504e-19
AC006159.1	-2.14415	3.1398	3.94912e-20	5.79725e-19
AC105118.1	4.35299	5.56012	4.53221e-20	6.64226e-19
AL031058.1	2.10436	7.34666	4.63032e-20	6.77489e-19
LINC00866	2.79622	4.17009	5.53643e-20	8.07411e-19
LINC02560	2.90767	7.28429	5.78954e-20	8.42942e-19
LINC01842	3.49273	5.83182	6.15159e-20	8.94192e-19
LINC01559	6.52595	8.24949	8.18948e-20	1.18654e-18
AC015712.6	2.96884	7.34335	1.01449e-19	1.46034e-18
LINC01168	-2.39183	3.11365	1.16052e-19	1.65981e-18
AC120036.4	2.28905	6.8602	1.22523e-19	1.74954e-18
ITGB1-DT	3.914	6.45533	1.238e-19	1.76495e-18
AC009121.1	2.07305	4.35991	1.30499e-19	1.85154e-18
LINC01166	-2.47869	3.34301	1.41286e-19	1.99822e-18
HOTAIR	6.77054	6.63393	1.44687e-19	2.04307e-18
AC004221.1	2.89228	3.56611	1.45691e-19	2.05399e-18
AC053503.2	2.29509	4.693	1.8637e-19	2.60683e-18
AC079160.1	5.997	5.47598	2.3652e-19	3.26721e-18
AC116025.2	2.95251	3.65958	2.40375e-19	3.31018e-18
AC105914.2	-2.77495	3.62136	2.54869e-19	3.50436e-18
STEAP2-AS1	3.14755	3.86255	2.63915e-19	3.62313e-18
AC134312.5	2.58204	5.33188	2.7492e-19	3.7626e-18
CALML3-AS1	3.25936	6.37609	2.77492e-19	3.78615e-18
AC068724.1	2.22868	3.41869	2.85862e-19	3.89437e-18
AC093390.1	-2.1361	3.07364	3.31798e-19	4.4995e-18
LINC01303	2.43889	5.87293	3.40257e-19	4.6072e-18
LINC02086	3.98498	6.87694	3.81063e-19	5.14406e-18
RNF144A-AS1	2.2001	7.47173	3.86485e-19	5.20147e-18
AC067930.5	2.28925	5.00935	3.91209e-19	5.25161e-18
AC024592.2	2.38207	5.29608	3.91391e-19	5.25161e-18
UMODL1-AS1	-2.05524	6.20925	4.0807e-19	5.45894e-18
AC006064.3	2.03335	4.15519	4.16542e-19	5.56066e-18
BARX1-DT	6.52641	6.01142	4.16925e-19	5.56066e-18
AC254629.1	3.93369	4.97623	5.29181e-19	6.99629e-18
AL352984.1	3.4634	3.71	5.29283e-19	6.99629e-18
LUCAT1	3.03083	8.88681	5.51029e-19	7.26215e-18
AL121772.1	2.04146	6.86366	5.54563e-19	7.29765e-18
DUXAP8	2.58837	8.63349	5.55363e-19	7.29765e-18
AC022784.3	2.53699	6.01202	5.93675e-19	7.77811e-18
CASC9	5.47593	8.56019	6.40619e-19	8.3808e-18
PKP4-AS1	2.38424	7.13145	6.78767e-19	8.85383e-18
AL118505.1	2.04373	6.1358	6.98701e-19	9.0872e-18
PCAT7	2.36894	6.01614	7.05703e-19	9.16486e-18
AC016044.1	6.12626	4.8205	7.27647e-19	9.42233e-18
C20orf197	3.04132	8.05005	8.07605e-19	1.03972e-17
AC089983.1	4.23537	5.93055	8.27516e-19	1.06381e-17
LINC00460	4.43492	8.38475	9.24712e-19	1.18363e-17
AC105219.2	2.90394	4.30035	1.03652e-18	1.32294e-17
AC002076.1	4.07943	4.72391	1.34436e-18	1.70362e-17
AC004870.2	4.54794	5.78559	1.46651e-18	1.85314e-17
AC243830.1	2.99918	3.79879	1.49453e-18	1.88586e-17
LINC02323	2.98598	6.22539	1.53325e-18	1.93198e-17
AC026785.3	7.25577	5.87204	1.6679e-18	2.09392e-17
LINC02163	6.03163	4.95618	1.66883e-18	2.09392e-17
AC084262.1	3.73439	4.23876	1.67773e-18	2.10212e-17
LINC02313	4.4799	4.96303	2.07196e-18	2.58153e-17
AC006329.1	2.27507	7.78299	2.21495e-18	2.74431e-17
HOXC13-AS	5.94945	5.54379	2.42239e-18	2.98884e-17
AC099518.1	2.22322	5.87523	2.56311e-18	3.14937e-17
U47924.1	2.14539	3.7599	2.57015e-18	3.15366e-17
AC089999.2	2.09776	4.42722	2.77571e-18	3.38256e-17
AC112721.2	3.27264	4.641	3.33617e-18	4.0379e-17
TRPM2-AS	3.43901	6.98501	3.40955e-18	4.12111e-17
LINC02133	4.38583	5.53543	3.5153e-18	4.23741e-17
LINC02122	4.61826	5.17153	3.93269e-18	4.71499e-17
LINC01597	4.14492	7.93714	4.22953e-18	5.03693e-17
FAM83C-AS1	2.26923	3.50249	4.38652e-18	5.21691e-17
LINC00858	5.11927	6.97273	4.6278e-18	5.47731e-17
AL590644.1	4.97844	5.23765	4.6301e-18	5.47731e-17
LINC02471	-2.31627	6.88706	4.63832e-18	5.47974e-17
AC068305.2	3.16267	5.5311	5.43785e-18	6.39037e-17
AP001626.1	2.64909	5.00581	5.88112e-18	6.89308e-17
AC010789.1	5.52671	4.88278	6.04536e-18	7.07625e-17
AP005230.1	3.88126	5.57514	6.2571e-18	7.31448e-17
AC108058.1	2.16038	6.19748	6.73473e-18	7.85219e-17
SATB2-AS1	2.83835	4.3551	6.86409e-18	7.99253e-17
LINC02029	3.98802	4.27835	6.89584e-18	8.019e-17
AC009262.1	4.27194	3.20048	7.24789e-18	8.4174e-17
AC103740.2	3.83829	4.10322	7.35009e-18	8.52495e-17
AC104248.1	2.76027	4.78177	8.34519e-18	9.61642e-17
AC110285.6	2.34595	4.70228	9.0454e-18	1.04098e-16
FIRRE	2.60792	6.70842	9.38546e-18	1.07733e-16
AC013652.1	2.36812	6.75868	9.45707e-18	1.08415e-16
LINC00501	5.27954	5.77953	1.02364e-17	1.16598e-16
AC011298.1	7.02627	6.82653	1.18936e-17	1.34441e-16
MYO16-AS1	-2.39679	6.22148	1.25089e-17	1.41217e-16
DRAIC	3.7276	9.91369	1.34788e-17	1.51974e-16
AC010328.1	3.36243	4.6226	1.41227e-17	1.58831e-16
AC123023.1	-2.24944	3.77215	1.67043e-17	1.86685e-16
AC103702.2	4.39345	7.11399	1.88583e-17	2.09966e-16
AL590666.3	2.7675	3.44518	1.99119e-17	2.21421e-16
LINC02156	3.11468	3.70518	2.14342e-17	2.37458e-16
AL138902.1	2.3781	3.76403	2.20762e-17	2.44266e-16
AC026368.1	2.38386	5.82864	2.31549e-17	2.55884e-16
CASC8	3.26632	6.75719	2.5454e-17	2.80246e-16
MIR4713HG	4.17608	4.34473	2.98181e-17	3.26275e-16
AL645608.7	3.10221	3.95141	3.27851e-17	3.57861e-16
AL161618.1	-2.31396	4.91704	3.34178e-17	3.6432e-16
AC116049.2	5.17007	3.92349	3.38868e-17	3.6898e-16
LINC00707	4.60587	7.42507	3.45868e-17	3.76142e-16
AL136221.1	2.04422	4.13922	3.58408e-17	3.89304e-16
LINC00973	6.23454	7.6109	3.61148e-17	3.91801e-16
LINC01748	4.86702	6.491	3.8571e-17	4.1743e-16
RMST	-2.09255	5.62195	4.06249e-17	4.39124e-16
LINC01970	2.04159	4.76215	4.47961e-17	4.81288e-16
MAFA-AS1	4.06499	5.0067	4.80683e-17	5.15199e-16
AC128709.2	-2.33246	3.39635	5.50904e-17	5.86225e-16
AC113404.1	-2.73606	3.41261	5.84575e-17	6.21312e-16
AC106882.1	2.4072	4.96811	5.86187e-17	6.22282e-16
AC020891.2	4.38267	4.13543	6.25676e-17	6.61833e-16
AL353807.2	2.22197	3.34306	6.2727e-17	6.62731e-16
AL139420.2	4.13312	2.9829	6.40801e-17	6.76224e-16
AL445471.1	2.14121	4.19571	6.95743e-17	7.32465e-16
AC117386.2	4.71873	4.65651	7.49549e-17	7.87248e-16
AC012640.1	2.23641	3.34186	7.51192e-17	7.88043e-16
AC061975.1	3.08427	3.53998	7.6424e-17	7.99427e-16
LINC01979	2.34867	5.11036	7.68266e-17	8.02171e-16
AC006946.2	2.59389	6.0774	7.74981e-17	8.08233e-16
LINC01926	3.43214	3.48121	7.8067e-17	8.13213e-16
AC023794.1	2.06165	5.29951	7.95227e-17	8.26441e-16
AC004034.1	2.44004	5.29185	9.95518e-17	1.02739e-15
NAALADL2-AS2	5.08247	5.52752	1.29167e-16	1.32534e-15
AC104699.1	2.22455	5.82841	1.30986e-16	1.34245e-15
STPG3-AS1	2.06689	5.84621	1.32496e-16	1.35637e-15
SALRNA1	2.60456	5.3482	1.37839e-16	1.40621e-15
AC023796.2	3.27029	3.6303	1.40406e-16	1.43076e-15
AC083809.1	4.98816	7.98682	1.42171e-16	1.44543e-15
AC073316.2	3.84262	4.89788	1.56865e-16	1.58396e-15
AC108868.1	-2.01778	3.03797	1.58312e-16	1.59676e-15
LINC00466	4.29667	3.5113	1.67226e-16	1.68285e-15
LINC02588	5.82677	6.3501	1.75636e-16	1.76151e-15
LINC01169	-2.03429	4.49542	1.76299e-16	1.76617e-15
AC108676.1	2.65848	6.09128	1.94928e-16	1.94622e-15
FAM222A-AS1	2.80862	5.47719	2.19796e-16	2.18959e-15
AP003390.1	2.18213	4.9795	2.5331e-16	2.51781e-15
AL157931.1	3.31946	4.53887	2.97223e-16	2.94115e-15
DLX6-AS1	4.44905	7.25418	3.1128e-16	3.06661e-15
AL139023.1	6.45996	4.75471	3.32325e-16	3.26669e-15
AL031710.2	2.01584	4.18415	3.4122e-16	3.35044e-15
HOXC-AS3	5.79334	5.59111	3.47436e-16	3.40396e-15
ELFN1-AS1	3.87036	6.51412	3.51534e-16	3.43653e-15
AL355596.1	5.00437	6.38376	3.62515e-16	3.53611e-15
LINC01214	5.78612	5.32781	3.64406e-16	3.55066e-15
LINC01969	2.91976	3.54204	3.6859e-16	3.5875e-15
ERVH48-1	4.75895	9.05273	4.11381e-16	3.97787e-15
LINC01561	3.19123	4.54953	4.41037e-16	4.23701e-15
AC093281.2	3.95056	3.55636	5.06722e-16	4.85754e-15
HAGLROS	2.52072	6.43041	5.17198e-16	4.95263e-15
AL357093.1	-2.02387	3.70754	5.28461e-16	5.05505e-15
AC008870.3	2.55575	3.29235	5.34012e-16	5.10266e-15
TTLL11-IT1	3.16674	4.66389	6.03958e-16	5.72794e-15
AL391427.1	3.88419	6.47034	6.27922e-16	5.94255e-15
LINC00519	2.44546	5.22832	8.09473e-16	7.59607e-15
LINP1	4.33621	7.11366	8.19487e-16	7.68194e-15
AL356417.2	2.22148	5.04828	1.00032e-15	9.28001e-15
AL162431.1	2.70962	4.28271	1.0004e-15	9.28001e-15
AC090164.3	3.68761	4.05731	1.03378e-15	9.54984e-15
LINC01436	3.2068	9.78932	1.0428e-15	9.61326e-15
AC009275.1	2.43414	6.14483	1.23861e-15	1.13361e-14
LINC01971	3.16105	3.6713	1.24569e-15	1.13891e-14
AL109761.1	2.5407	4.55093	1.26141e-15	1.1521e-14
CU639417.4	3.37426	3.70942	1.27685e-15	1.16404e-14
AC092436.2	4.99407	4.9811	1.27709e-15	1.16404e-14
AL513123.1	5.17592	3.90448	1.48891e-15	1.35295e-14
LINC02321	2.54347	4.90417	1.60579e-15	1.45618e-14
AC010275.1	4.73124	4.45403	1.69777e-15	1.5349e-14
AC003965.2	2.12666	5.03334	1.89442e-15	1.70402e-14
AC122134.1	5.70229	4.75206	1.89895e-15	1.70637e-14
AL049555.1	3.40505	8.15237	1.98936e-15	1.78401e-14
AL157400.2	3.07894	3.05684	2.02547e-15	1.81273e-14
AC068189.1	2.4147	3.17375	2.10504e-15	1.88098e-14
AC012213.1	5.35152	4.68065	2.18373e-15	1.94654e-14
AL513327.2	2.27791	3.67296	2.24512e-15	1.99726e-14
AC092920.1	3.44202	3.03067	2.27864e-15	2.02506e-14
LINC02562	2.27919	8.34549	2.49243e-15	2.20623e-14
AC090192.2	4.48173	4.02769	2.56335e-15	2.2645e-14
LINC01468	5.89696	5.59743	2.61935e-15	2.30939e-14
LINC02324	2.67347	3.5685	2.84785e-15	2.50589e-14
LINC01792	3.47523	3.56593	2.8892e-15	2.53725e-14
AC025575.2	5.03754	6.63072	2.91057e-15	2.55349e-14
AP001574.1	2.72513	5.76113	3.18412e-15	2.78251e-14
AC012501.1	5.11641	3.57254	3.23556e-15	2.82192e-14
LINC02475	3.91458	6.17589	3.24157e-15	2.82439e-14
AC127164.1	2.11933	5.39276	3.2896e-15	2.86063e-14
AC128689.1	3.87753	5.31072	3.33664e-15	2.89871e-14
AL133284.1	4.65877	5.50733	3.5795e-15	3.09759e-14
AL662890.1	2.68641	4.35387	3.89831e-15	3.35951e-14
LINC01978	2.14791	4.80991	3.98985e-15	3.42846e-14
LINC00491	5.60363	5.86601	4.08094e-15	3.49413e-14
AC129507.4	3.61979	7.2176	4.20737e-15	3.59892e-14
AL117329.1	5.70688	4.49906	4.50158e-15	3.8432e-14
AC025431.1	-2.11225	2.78186	4.58853e-15	3.90992e-14
LINC01305	5.03207	4.45638	4.63661e-15	3.94711e-14
EGOT	2.32967	6.06696	4.74534e-15	4.03195e-14
LINC01587	2.89645	4.83724	4.79684e-15	4.07182e-14
MIR137HG	4.96617	4.92282	5.2746e-15	4.46885e-14
LINC01775	2.34337	3.37577	5.31105e-15	4.49544e-14
AC010595.1	5.69502	4.35791	5.75907e-15	4.8654e-14
AC245041.1	-2.03701	6.84765	6.14188e-15	5.17898e-14
AL731684.1	3.95187	3.75776	6.28607e-15	5.29053e-14
AL356234.2	4.22356	4.66026	6.4896e-15	5.45666e-14
AC006262.1	2.44792	5.56984	6.77601e-15	5.68137e-14
AC141930.1	2.65128	5.46434	6.92779e-15	5.79771e-14
AC114489.1	4.01011	3.95094	7.00684e-15	5.85835e-14
LINC01564	2.95915	6.37932	7.27146e-15	6.07125e-14
LINC00941	3.32715	7.40288	7.37728e-15	6.15073e-14
LINC01234	5.48326	7.15686	7.56875e-15	6.30446e-14
AC078820.1	3.20092	4.63734	7.93829e-15	6.59991e-14
AC100791.2	3.40802	3.08993	8.03447e-15	6.66741e-14
AC074327.1	2.05334	4.72568	8.18969e-15	6.78356e-14
LINC00626	3.49125	3.89273	8.21408e-15	6.79744e-14
LINC02043	2.41249	3.69842	8.28359e-15	6.84859e-14
LINC01287	5.76049	7.43621	8.39754e-15	6.93636e-14
MIR9-3HG	2.71158	8.7981	8.64468e-15	7.13387e-14
AC104461.1	2.80296	5.82353	8.83971e-15	7.2813e-14
AC131009.2	3.77671	3.73758	9.15311e-15	7.51857e-14
LINC01615	2.28666	5.55083	9.33784e-15	7.65617e-14
AL133370.1	5.45423	6.29821	1.03542e-14	8.46607e-14
LINC02418	7.50373	8.29936	1.05106e-14	8.58607e-14
LINC01393	2.06435	5.28028	1.06844e-14	8.70068e-14
LINC02065	3.27561	3.41445	1.069e-14	8.70068e-14
AC026462.3	5.38396	4.35725	1.14055e-14	9.24913e-14
AC005537.1	3.52419	5.9898	1.16641e-14	9.45023e-14
LINC01968	2.60347	3.33485	1.18663e-14	9.60536e-14
AC112721.1	2.86536	4.03597	1.21716e-14	9.84351e-14
LINC02387	3.33985	4.92607	1.33269e-14	1.07388e-13
SRGAP3-AS2	-2.31979	8.29826	1.37434e-14	1.10344e-13
POU6F2-AS2	6.18763	5.22009	1.44906e-14	1.16134e-13
AC141930.2	3.15381	3.55947	1.52542e-14	1.21705e-13
AC040174.1	4.33831	4.59189	1.65886e-14	1.31644e-13
LINC00165	-2.40582	4.02224	1.68146e-14	1.33199e-13
AC020928.2	2.92439	6.01115	1.79879e-14	1.42367e-13
AC090627.1	4.06784	4.4859	1.821e-14	1.43913e-13
AC025166.1	2.38638	3.23934	1.83492e-14	1.4484e-13
AC144450.1	2.57319	5.67802	1.93856e-14	1.52345e-13
LINC01213	3.82268	3.94696	1.9502e-14	1.53124e-13
AC019155.3	4.90129	5.17686	2.07898e-14	1.62805e-13
AP004608.1	2.92954	9.47171	2.09811e-14	1.64158e-13
LINC01876	2.16499	6.98188	2.1258e-14	1.66009e-13
AC034206.1	3.69724	4.23537	2.12769e-14	1.66009e-13
AC114803.1	4.16762	2.9973	2.13347e-14	1.66194e-13
LINC01843	2.34587	7.07897	2.2025e-14	1.71421e-13
AC012531.1	3.42147	4.73462	2.22959e-14	1.73227e-13
AC087667.1	3.2761	4.58681	2.3484e-14	1.81981e-13
AL022324.3	3.48777	3.24224	2.38697e-14	1.84808e-13
U62317.1	2.76368	5.84055	2.40858e-14	1.86319e-13
AC122710.3	2.36054	3.75944	2.42811e-14	1.87667e-13
AC010168.1	2.20806	4.62946	2.74546e-14	2.11094e-13
FNDC1-IT1	2.96021	3.14251	2.78265e-14	2.13584e-13
AC126696.3	2.94813	3.30824	2.78948e-14	2.13924e-13
AC005993.1	4.78557	5.33949	2.89712e-14	2.21796e-13
AC011352.1	3.53692	3.24477	3.00512e-14	2.2967e-13
APCDD1L-DT	3.20358	6.28722	3.10891e-14	2.36991e-13
HOXA11-AS	4.33123	5.34536	3.22563e-14	2.45678e-13
AL391845.2	2.02172	4.34902	3.25103e-14	2.47401e-13
AC010343.3	4.1875	4.35109	3.37568e-14	2.56229e-13
HHATL-AS1	-2.02201	4.09001	3.40516e-14	2.58246e-13
AC125603.2	4.7313	7.37751	3.58028e-14	2.70605e-13
LINC02015	2.6845	6.83224	4.33256e-14	3.25253e-13
AC120042.3	4.64132	6.29707	4.84945e-14	3.62831e-13
AL445183.2	3.29973	6.08792	4.99981e-14	3.73768e-13
AC108451.2	4.0081	5.50165	5.23762e-14	3.91216e-13
LINC02398	3.25383	4.74209	5.28146e-14	3.9416e-13
AP003500.2	3.76524	3.5607	5.30981e-14	3.95943e-13
AF127577.3	6.00382	5.20658	5.38325e-14	4.01084e-13
FP325330.3	4.5995	3.416	5.95017e-14	4.41843e-13
LEMD1-AS1	2.20974	4.76705	6.19313e-14	4.595e-13
AC026355.2	4.5871	3.50095	6.39173e-14	4.73052e-13
LINC01611	5.68308	4.12287	6.55723e-14	4.84897e-13
LINC00682	5.31589	4.0595	6.83191e-14	5.0437e-13
IGFL2-AS1	4.14964	5.73373	7.29355e-14	5.36227e-13
LINC02428	4.2658	4.24524	7.40528e-14	5.43543e-13
AL035252.2	3.37654	4.9151	7.56994e-14	5.54257e-13
AC027281.1	-2.10571	5.10188	7.98031e-14	5.83343e-13
AP000821.1	-2.03079	3.06985	8.10013e-14	5.91615e-13
AC090125.1	4.02919	3.52858	8.18802e-14	5.97544e-13
LINC01518	5.98656	4.65926	8.39995e-14	6.11505e-13
AC027627.1	3.5127	2.90467	8.5428e-14	6.20382e-13
AL049874.3	3.08896	3.54276	8.75887e-14	6.35356e-13
AL590004.4	2.63841	7.7333	9.3786e-14	6.78309e-13
LINC00676	10.0359	8.75574	9.62667e-14	6.95685e-13
AL589642.2	4.65255	3.37033	9.81067e-14	7.07259e-13
LINC00518	4.47564	3.31335	1.01641e-13	7.31556e-13
AC083973.1	2.48707	4.21138	1.07708e-13	7.72715e-13
AC092484.1	5.00117	5.20756	1.25279e-13	8.95883e-13
AC012213.4	4.85461	4.34731	1.25765e-13	8.98639e-13
AC246793.1	3.31671	3.47625	1.64194e-13	1.15926e-12
AP000526.1	3.16075	3.46252	1.71224e-13	1.20603e-12
AC116345.1	5.02939	5.62844	1.73084e-13	1.21816e-12
AC021087.4	3.1107	3.69157	2.04835e-13	1.43143e-12
AL354993.2	3.2612	4.54373	2.08842e-13	1.45714e-12
AP000977.1	2.07731	3.85401	2.14842e-13	1.49666e-12
AC022098.2	2.68029	6.1028	2.27349e-13	1.57638e-12
AL359764.1	4.01254	4.2672	2.35266e-13	1.62745e-12
HOXC-AS1	3.19898	4.82892	2.35629e-13	1.62745e-12
AC022733.1	4.47578	7.80921	2.4149e-13	1.66664e-12
AC022148.1	3.33097	5.75378	2.54559e-13	1.75411e-12
AC015909.1	2.38056	3.76889	2.63506e-13	1.81016e-12
C10orf91	2.00955	6.20868	2.6928e-13	1.84696e-12
AF015262.1	3.59883	3.11198	2.71036e-13	1.85758e-12
AC244205.1	2.1401	5.34623	2.71588e-13	1.85993e-12
SYNPR-AS1	2.06085	6.63537	2.74331e-13	1.87727e-12
AC106799.1	4.49889	3.18332	2.94373e-13	2.00824e-12
AC010894.3	3.15201	6.3531	2.96947e-13	2.02269e-12
LINC00567	3.7875	5.52387	3.18132e-13	2.16038e-12
LINC01633	5.09325	3.72392	3.28491e-13	2.22733e-12
AC024901.1	2.76341	5.24485	3.80112e-13	2.56367e-12
PANCR	5.63986	4.12226	3.94658e-13	2.65775e-12
DPP10-AS1	3.18997	7.32394	4.04706e-13	2.72335e-12
LINC02490	4.94816	3.63802	4.41756e-13	2.95479e-12
AL022341.2	2.13089	4.56724	4.82363e-13	3.2119e-12
AC024560.1	2.407	4.53056	4.87776e-13	3.24552e-12
AC087273.1	3.77558	3.00674	5.01218e-13	3.32874e-12
BCAR4	6.39639	6.50528	5.01407e-13	3.32874e-12
PLAC4	4.26	9.03356	5.0576e-13	3.35514e-12
AC022784.8	2.36662	4.01143	5.08386e-13	3.36818e-12
AC136475.3	2.10128	10.1632	5.08483e-13	3.36818e-12
AL122019.1	3.77992	3.80697	5.14613e-13	3.40371e-12
SSTR5-AS1	5.28649	5.73209	5.53059e-13	3.65529e-12
AL139385.1	2.066	6.54042	5.57655e-13	3.68019e-12
LINC01807	5.11049	4.76978	6.10391e-13	4.00741e-12
AP003900.1	5.86745	4.1153	6.39281e-13	4.1909e-12
AC007368.1	3.98577	5.43293	6.78067e-13	4.42884e-12
AC009097.2	2.0585	3.54847	7.30958e-13	4.75684e-12
LINC02257	2.153	8.03884	7.53447e-13	4.89245e-12
AL596223.1	3.34672	4.42201	7.54712e-13	4.89709e-12
AC005330.1	2.37433	4.81329	7.64013e-13	4.95384e-12
LINC02365	3.20591	5.23368	7.73637e-13	5.00893e-12
AC106799.2	5.15403	4.16073	8.45447e-13	5.46194e-12
AC008268.1	-2.13587	9.66522	9.559e-13	6.13985e-12
AC087045.2	2.09512	4.30863	1.06348e-12	6.78672e-12
AL049830.3	2.30371	4.46762	1.07612e-12	6.85757e-12
AC211433.1	2.2102	5.64364	1.09178e-12	6.95239e-12
AC008406.3	2.96058	3.12396	1.09293e-12	6.95471e-12
AC092535.1	2.2088	4.88238	1.14213e-12	7.25741e-12
AC097625.1	2.79849	4.25527	1.15486e-12	7.33306e-12
AC114488.1	2.13001	5.11316	1.19431e-12	7.57815e-12
LINC01385	5.4965	4.01739	1.22529e-12	7.76367e-12
AC008083.1	2.32121	3.97728	1.29445e-12	8.17857e-12
AL133325.3	5.50654	4.30206	1.33331e-12	8.41813e-12
LINC01511	5.73484	7.0282	1.34604e-12	8.48642e-12
AP000696.1	4.03859	3.58155	1.37408e-12	8.65708e-12
AC020891.3	3.30028	2.61578	1.41749e-12	8.91165e-12
AC106785.2	5.96506	4.53978	1.49764e-12	9.38901e-12
AP003031.1	2.52711	3.21818	1.52846e-12	9.56202e-12
AC021218.1	3.13232	6.62105	1.58269e-12	9.89434e-12
AL355916.1	2.88386	8.5856	1.6302e-12	1.01699e-11
AP002754.1	2.30697	5.40693	1.80603e-12	1.12432e-11
AC004149.1	2.97246	3.64539	1.8826e-12	1.17035e-11
AC007221.1	-2.08527	2.81219	1.94288e-12	1.20445e-11
AC110619.1	2.00289	7.46986	1.99718e-12	1.23553e-11
LUARIS	2.17569	3.75934	2.33662e-12	1.43554e-11
POU6F2-AS1	4.18317	3.2143	2.43571e-12	1.49332e-11
AC106799.3	5.04387	4.96716	2.44468e-12	1.49779e-11
AC023421.1	4.85575	9.41156	2.472e-12	1.51349e-11
BX005040.1	-2.2639	3.4256	2.68929e-12	1.64087e-11
AC109446.3	2.58846	6.26835	2.70247e-12	1.64665e-11
AC093833.1	3.55663	2.7164	2.72e-12	1.65507e-11
MIR31HG	3.52478	5.66858	2.74326e-12	1.66694e-11
AC106772.1	2.80608	2.72974	2.82368e-12	1.71464e-11
AL353770.4	-2.20377	3.97152	2.91468e-12	1.76628e-11
AL033397.1	5.66008	9.52256	2.98468e-12	1.80624e-11
AL606970.1	4.46806	5.22177	2.99774e-12	1.81291e-11
MIR548XHG	6.37974	5.04952	3.0174e-12	1.82356e-11
LINC00824	4.21052	6.1475	3.08002e-12	1.86014e-11
AL022313.2	2.81469	5.10957	3.21543e-12	1.93797e-11
LINC01804	5.00121	4.95804	3.27609e-12	1.9692e-11
AC079466.1	7.07286	6.16903	3.28695e-12	1.97439e-11
AC093515.1	4.45522	4	3.2948e-12	1.97777e-11
AC010735.1	2.73521	4.24065	3.33322e-12	1.99948e-11
AC244250.1	3.15196	2.7937	3.38336e-12	2.02819e-11
AC100826.1	5.08271	6.21104	3.56474e-12	2.13118e-11
AP000424.2	2.28884	3.3638	3.73751e-12	2.22698e-11
LINC00251	4.16092	2.99946	3.79153e-12	2.25615e-11
AL354861.2	2.43987	3.12843	4.07634e-12	2.42077e-11
LINC01687	4.5963	3.24435	4.11336e-12	2.44112e-11
LINC01194	6.21195	6.11073	4.31445e-12	2.55535e-11
LINC02466	5.18049	3.61239	4.94496e-12	2.9152e-11
HOXA10-AS	4.20357	3.87745	4.96258e-12	2.92365e-11
AC087379.1	3.8921	4.14207	5.02904e-12	2.95889e-11
AL590491.2	-2.25415	3.74938	5.06327e-12	2.97705e-11
MIR2052HG	3.68695	4.99068	5.15571e-12	3.02941e-11
AC008063.1	2.05566	5.70001	5.49072e-12	3.2114e-11
AC069277.1	4.16737	5.00069	5.55325e-12	3.24371e-11
AC023090.1	2.67169	4.64214	5.69538e-12	3.32019e-11
AL138720.1	2.11798	4.03992	5.98479e-12	3.47978e-11
MAGEA10-MAGEA5	3.3661	3.57768	6.05709e-12	3.51952e-11
LINC01980	6.24899	6.37125	6.12519e-12	3.55445e-11
AL121827.2	2.57033	5.88995	6.13321e-12	3.55678e-11
DSCAM-AS1	7.94641	10.5632	6.18952e-12	3.58691e-11
AC245100.6	2.93162	3.32943	6.19322e-12	3.58691e-11
PURPL	4.05029	5.9828	6.33135e-12	3.65738e-11
AC011632.1	4.90866	5.87416	6.35536e-12	3.66411e-11
AC005996.1	3.0837	3.85229	6.47758e-12	3.72975e-11
AP000525.1	2.00474	4.76434	6.51934e-12	3.74893e-11
AL136537.2	6.09286	5.28621	7.11147e-12	4.07102e-11
AC098936.1	2.11213	3.67775	7.51759e-12	4.2897e-11
AC005291.2	3.39118	4.57604	7.56688e-12	4.31506e-11
AL133320.1	-2.15596	5.53317	8.00758e-12	4.54598e-11
LINC02178	5.87115	4.28878	8.56362e-12	4.85544e-11
AL023755.1	3.42197	2.92679	8.73132e-12	4.94423e-11
LINC02293	4.40107	4.3186	8.90244e-12	5.03792e-11
MYCNOS	3.6264	4.5231	9.07713e-12	5.13025e-11
AC010735.2	2.08111	5.93236	9.23161e-12	5.21094e-11
AL121904.1	3.44605	4.92624	9.27467e-12	5.23193e-11
AC003092.1	5.27649	5.8816	9.8768e-12	5.56806e-11
LINC02109	4.52146	4.2756	1.00848e-11	5.67454e-11
AC007405.2	2.78928	3.24616	1.0346e-11	5.81048e-11
LHX1-DT	5.71993	4.98857	1.11481e-11	6.22556e-11
AC098798.1	4.43859	3.71847	1.14172e-11	6.36786e-11
AL162411.1	2.47002	4.77491	1.15694e-11	6.44868e-11
LINC02048	4.04112	3.95635	1.16287e-11	6.47769e-11
LINC01269	2.15419	5.8225	1.2084e-11	6.71871e-11
AC138305.1	3.44981	4.04716	1.21169e-11	6.73281e-11
AC114316.2	3.45531	4.8378	1.4467e-11	7.98872e-11
AC007848.1	3.50791	4.99489	1.46364e-11	8.06723e-11
AC117402.1	2.9997	6.71912	1.49594e-11	8.24016e-11
DSCR8	6.54789	6.05823	1.49986e-11	8.25668e-11
LINC02253	5.10161	6.04704	1.50168e-11	8.26156e-11
AC114296.1	3.06214	3.78382	1.54164e-11	8.45007e-11
AP005328.1	3.54965	4.1745	1.66017e-11	9.07177e-11
ERVK-28	3.28261	3.20336	1.68262e-11	9.18316e-11
AC109454.3	3.66738	4.23115	1.76931e-11	9.62679e-11
AL359313.1	3.33457	3.68022	1.94994e-11	1.05708e-10
SAMSN1-AS1	3.15697	4.11108	1.98909e-11	1.07633e-10
AC079384.1	3.60777	6.1569	2.00794e-11	1.08456e-10
LINC00659	3.79173	4.26702	2.0407e-11	1.10158e-10
Z99943.1	2.29164	4.41877	2.18132e-11	1.17464e-10
Z85994.1	3.01975	3.42401	2.47997e-11	1.32822e-10
AL611929.1	4.54955	4.02911	2.62251e-11	1.40035e-10
AC239584.1	3.86294	4.28782	2.6329e-11	1.40505e-10
H19	3.38216	13.5389	2.71218e-11	1.44304e-10
AC011700.1	3.1276	4.155	2.74889e-11	1.46082e-10
AC246787.2	2.08798	4.26849	2.76019e-11	1.46595e-10
LINC01811	-2.04083	3.21943	2.84109e-11	1.50622e-10
LINC02331	2.85372	4.51333	2.87248e-11	1.52195e-10
HOXB-AS4	4.13306	4.39505	2.8783e-11	1.52413e-10
LINC00898	4.54468	3.89111	2.88066e-11	1.52447e-10
AP003472.1	2.31102	4.0608	2.88269e-11	1.52464e-10
LINC01224	2.56243	7.48321	3.04994e-11	1.60356e-10
AC058791.1	2.52578	6.96802	3.127e-11	1.64117e-10
AC093520.1	2.10262	3.97901	3.14078e-11	1.64549e-10
AL589182.1	4.98813	3.47917	3.26746e-11	1.70984e-10
AC021594.1	2.91705	3.36833	3.28516e-11	1.7181e-10
AC117386.1	4.52925	3.48122	3.59607e-11	1.8723e-10
AL513548.1	5.00623	5.58451	3.72972e-11	1.93919e-10
AC068722.1	3.02839	3.08874	3.79795e-11	1.97236e-10
AL390115.1	2.16348	3.08724	3.97238e-11	2.06054e-10
AL365226.2	3.18024	9.00878	3.99171e-11	2.06936e-10
MIR194-2HG	2.92322	5.08109	4.07315e-11	2.10912e-10
AP003174.1	3.32301	3.09721	4.08675e-11	2.11493e-10
AC021683.2	3.15921	6.56266	4.24195e-11	2.19143e-10
AC125603.1	4.415	6.13761	4.39491e-11	2.2665e-10
AGBL1-AS1	-2.09265	2.82121	4.4988e-11	2.31739e-10
CASC19	4.46337	4.88159	4.52572e-11	2.32991e-10
AC097512.1	5.18263	3.7672	4.62865e-11	2.38152e-10
LINC00536	3.31093	2.80655	4.65862e-11	2.39555e-10
AC093904.3	3.17326	3.06183	4.67023e-11	2.40014e-10
LINC01629	3.35396	4.68691	4.67771e-11	2.40259e-10
TBC1D3P1-DHX40P1	4.71545	3.32518	4.79107e-11	2.45515e-10
PLUT	4.99485	3.81198	4.82061e-11	2.46886e-10
LINC01583	2.23441	3.68929	4.94262e-11	2.52844e-10
AC022028.2	2.65199	4.05252	5.0877e-11	2.60116e-10
AC073316.1	4.31136	3.57057	5.13816e-11	2.62394e-10
AP000527.1	4.64354	3.6495	5.18079e-11	2.6442e-10
LINC02525	5.64523	4.51413	5.1882e-11	2.64646e-10
LINC02223	3.65113	3.74501	5.44583e-11	2.7731e-10
LINC01299	4.97299	4.07591	5.47624e-11	2.78699e-10
AC126323.6	2.69503	4.75935	5.69513e-11	2.89178e-10
LINC00589	2.21611	5.58088	5.92077e-11	2.9995e-10
LINC01344	2.40522	3.91399	6.03261e-11	3.05094e-10
LINC02492	5.32344	4.01497	6.59802e-11	3.32555e-10
AC099329.2	2.40575	7.12233	6.95517e-11	3.49369e-10
AC073578.1	4.10858	3.62033	7.1648e-11	3.5929e-10
AC131097.3	2.1715	5.89475	7.33911e-11	3.67617e-10
LINC00184	2.0129	4.84538	7.43235e-11	3.72078e-10
AC108025.2	4.15371	3.25726	7.57657e-11	3.79084e-10
AL034345.2	2.65801	3.15655	8.04308e-11	4.01297e-10
AC099520.1	4.42391	3.24857	8.37308e-11	4.17294e-10
LINC01571	-2.06965	4.56841	9.17459e-11	4.54945e-10
SPATA3-AS1	2.31956	3.81033	9.28806e-11	4.60315e-10
AC090578.1	3.26712	3.67455	9.49752e-11	4.70434e-10
AC022240.1	2.86766	3.38897	9.70278e-11	4.80067e-10
AL390729.1	2.69245	4.41313	9.7481e-11	4.82041e-10
CHL1-AS1	2.37968	3.76695	9.89246e-11	4.88365e-10
AC137834.2	2.17238	3.02131	1.07124e-10	5.27089e-10
LINC00524	3.39861	4.64833	1.09996e-10	5.40918e-10
AP003721.1	2.06236	3.30856	1.12082e-10	5.50264e-10
AC084026.2	2.58257	4.24438	1.1268e-10	5.52894e-10
DEPDC1-AS1	2.18933	3.14219	1.14952e-10	5.63736e-10
AL596218.1	2.76866	5.59847	1.17689e-10	5.75888e-10
LINC01206	3.68272	4.67934	1.32489e-10	6.46175e-10
ST7-OT4	2.03406	5.05826	1.3418e-10	6.53704e-10
AC009139.1	3.16138	3.45221	1.39925e-10	6.79462e-10
LINC02477	2.89877	3.23096	1.42558e-10	6.91492e-10
AC025434.1	2.8898	2.85223	1.56254e-10	7.55863e-10
AL445072.1	3.72319	2.78769	1.57286e-10	7.60445e-10
C5orf66-AS1	4.03447	4.18953	1.58182e-10	7.63946e-10
AP000542.2	5.1261	3.80382	1.59622e-10	7.7048e-10
AC145146.1	2.37195	3.49147	1.59963e-10	7.71708e-10
CDKN2A-DT	2.77392	3.29916	1.62759e-10	7.84771e-10
ARNTL2-AS1	2.72685	3.22036	1.6546e-10	7.96933e-10
AC034223.2	4.4809	3.43992	1.68403e-10	8.09791e-10
AC069120.1	3.56672	4.21816	1.71136e-10	8.22042e-10
AC090709.1	2.95023	3.64053	1.72384e-10	8.27145e-10
KIF25-AS1	3.3346	7.31484	1.76067e-10	8.43e-10
HNF1A-AS1	2.64141	7.79098	1.81346e-10	8.66875e-10
AC009743.1	3.49982	3.73281	1.85603e-10	8.8532e-10
AC109588.1	5.86705	4.3194	1.89214e-10	9.00131e-10
AL109924.2	2.36639	3.00182	1.89505e-10	9.00552e-10
AC002378.1	3.97015	4.01645	1.90595e-10	9.05107e-10
AC107308.1	3.93816	3.12181	1.92943e-10	9.14451e-10
LINC01449	2.08443	2.94168	1.99286e-10	9.42001e-10
AC073284.1	2.9606	2.86661	2.01229e-10	9.48162e-10
LINC00958	2.54332	7.7969	2.0252e-10	9.5374e-10
AP003119.1	3.32149	5.24661	2.03553e-10	9.58098e-10
AL512488.1	2.47559	7.332	2.05189e-10	9.64779e-10
SOX21-AS1	2.28445	8.00565	2.05608e-10	9.66237e-10
AC090502.3	3.3294	2.82818	2.11484e-10	9.9228e-10
AC114291.1	-2.10474	4.4507	2.1656e-10	1.01556e-09
MEG3	2.04418	11.8522	2.23903e-10	1.04834e-09
LINC01510	3.67071	4.17406	2.2448e-10	1.05048e-09
AC024581.1	2.65146	2.9229	2.40998e-10	1.12424e-09
AC108136.1	3.63325	3.64145	2.43159e-10	1.13372e-09
G2E3-AS1	5.19749	4.36301	2.5208e-10	1.17409e-09
LINC00648	3.97862	7.14058	2.61595e-10	1.21585e-09
LINC01356	2.33388	4.93096	2.65849e-10	1.23498e-09
LINC02484	5.86665	4.12398	2.67111e-10	1.2402e-09
AC090833.1	3.21236	3.71214	2.72596e-10	1.26237e-09
ERVMER61-1	5.70785	4.21503	2.85336e-10	1.31794e-09
MANCR	3.13359	5.86197	2.94789e-10	1.35964e-09
AL122008.3	2.12751	3.98423	2.98385e-10	1.37464e-09
LINC01429	2.82504	3.1455	3.03056e-10	1.39472e-09
LINC02377	5.75256	4.02003	3.04771e-10	1.40189e-09
AL136298.1	2.99171	3.38165	3.15184e-10	1.44828e-09
LINC01967	4.16041	3.55152	3.261e-10	1.49381e-09
AC016723.1	4.44544	3.89369	3.47431e-10	1.58662e-09
SAMMSON	2.57728	3.45792	3.5804e-10	1.63256e-09
AC006946.3	2.04685	3.62275	3.67076e-10	1.67205e-09
LINC02263	3.97717	3.11666	3.78082e-10	1.7213e-09
AC008109.1	4.4305	5.14773	3.79487e-10	1.72681e-09
AC135782.1	2.91643	3.52037	4.0406e-10	1.83346e-09
AL445647.1	5.02077	3.80511	4.08041e-10	1.84918e-09
AC099487.1	3.73361	3.22002	4.23561e-10	1.91755e-09
ABCA9-AS1	3.18284	4.71529	4.28038e-10	1.93631e-09
LINC00355	4.38846	5.74986	4.3806e-10	1.97917e-09
AC148476.1	2.02253	5.04654	4.51831e-10	2.03622e-09
LINC01543	3.34936	3.00748	4.54117e-10	2.04447e-09
AC010307.4	2.85804	4.02949	4.54122e-10	2.04447e-09
ZFHX4-AS1	4.00231	4.25483	4.66932e-10	2.10002e-09
AL355075.4	6.11314	8.10301	4.85489e-10	2.17687e-09
AC064807.2	2.17576	3.93312	4.88034e-10	2.18718e-09
LINC01524	3.29168	3.57326	5.09889e-10	2.27938e-09
LINC00601	3.68181	3.72853	5.13492e-10	2.29434e-09
AC092675.1	2.50137	4.84821	5.18381e-10	2.31502e-09
AC139491.2	2.13578	6.56138	5.20418e-10	2.32295e-09
AC020658.4	2.1891	2.83708	5.22746e-10	2.331e-09
LINC00592	2.00328	4.92674	5.4676e-10	2.43564e-09
AC020934.1	3.12588	2.88681	5.61442e-10	2.49979e-09
LINC02208	2.80339	3.3799	5.69055e-10	2.53116e-09
AC091179.1	5.04595	4.13513	5.78501e-10	2.57189e-09
AL355512.1	2.08853	4.07203	5.81377e-10	2.58338e-09
AF274573.1	6.50363	4.98862	6.1097e-10	2.70811e-09
DPYD-AS1	2.88754	6.87718	6.11758e-10	2.71026e-09
AC009630.2	2.18511	2.7222	6.31389e-10	2.79167e-09
LINC01116	2.03601	8.00825	6.33363e-10	2.79901e-09
AL109914.1	2.39401	3.66821	6.48992e-10	2.86523e-09
AC026336.3	6.25648	6.34423	6.62656e-10	2.91867e-09
AC106771.1	5.41635	4.51411	6.62737e-10	2.91867e-09
LINC01419	7.29002	7.79302	6.72335e-10	2.95947e-09
AC005064.1	2.5737	5.33307	6.73475e-10	2.96009e-09
AC023794.3	2.61676	3.43539	7.20245e-10	3.15475e-09
FER1L6-AS2	4.27004	3.37987	7.3001e-10	3.19462e-09
AC129926.1	2.39785	5.07203	7.35733e-10	3.21784e-09
AL160271.1	6.91171	5.90295	7.62959e-10	3.332e-09
CERNA3	2.0229	2.87266	7.66196e-10	3.34285e-09
AC008115.2	3.315	3.3076	7.68821e-10	3.35266e-09
AC123768.1	2.29458	2.62706	7.85159e-10	3.42056e-09
AC055717.2	5.54752	4.06167	8.19251e-10	3.56569e-09
AL355483.1	2.57087	2.63831	8.19275e-10	3.56569e-09
DSCR4	5.91384	4.14033	8.21464e-10	3.57347e-09
LINC00221	5.21924	6.16607	8.24791e-10	3.58444e-09
AC010307.2	2.07639	4.1499	8.6276e-10	3.74396e-09
LINC02152	4.30408	3.5006	8.86133e-10	3.83977e-09
AP000842.3	2.91346	3.6352	9.04955e-10	3.9156e-09
KCNQ5-IT1	3.42512	3.62117	9.69856e-10	4.18421e-09
LINC01776	3.70927	3.39967	9.73687e-10	4.1987e-09
AC025244.1	4.06383	3.66769	9.79277e-10	4.21919e-09
AC019171.1	2.42364	6.43684	1.05198e-09	4.51881e-09
AC078850.2	2.91776	3.74078	1.09043e-09	4.67269e-09
ATP11AUN	3.78952	6.0027	1.10592e-09	4.73449e-09
AC005291.1	3.08352	4.14645	1.12542e-09	4.811e-09
AC040174.2	3.28243	3.03939	1.14286e-09	4.8809e-09
AC096734.1	2.12501	3.31457	1.1517e-09	4.91628e-09
LINC00668	3.99057	6.53573	1.16419e-09	4.96722e-09
LINC02192	3.46186	3.2526	1.1828e-09	5.04419e-09
AC131971.1	2.01026	5.18405	1.24806e-09	5.31484e-09
PRKCA-AS1	3.69913	4.32618	1.38319e-09	5.86504e-09
AP002478.1	2.87981	5.08142	1.4792e-09	6.24537e-09
TBL1XR1-AS1	2.72897	3.80963	1.48138e-09	6.25159e-09
AC087855.2	3.60049	2.73468	1.50554e-09	6.35056e-09
AC096759.2	4.59758	3.81039	1.51565e-09	6.39015e-09
ZBTB20-AS1	2.00333	4.50811	1.63158e-09	6.8562e-09
AL356133.2	4.69419	3.4802	1.64313e-09	6.90147e-09
AL691420.1	5.11215	3.6984	1.65959e-09	6.96401e-09
AC122694.1	3.61609	3.70491	1.67325e-09	7.01471e-09
LINC02335	5.21856	3.81311	1.7367e-09	7.26362e-09
AC090826.1	2.12801	4.50795	1.79307e-09	7.4853e-09
AL354993.1	2.07993	4.92716	1.82956e-09	7.62686e-09
MIR181A1HG	2.35556	5.08562	1.833e-09	7.63407e-09
PINCR	4.6648	3.5923	1.87459e-09	7.79999e-09
AC080129.1	3.4822	3.03637	1.87615e-09	7.80283e-09
AC006206.2	3.09232	6.64933	1.88213e-09	7.82403e-09
MAGEA4-AS1	6.37549	4.73548	1.88426e-09	7.82922e-09
LINC02404	5.43554	4.95982	1.96521e-09	8.14656e-09
AC090809.1	5.53497	4.01571	2.03936e-09	8.4382e-09
HAR1B	2.26079	5.35763	2.04842e-09	8.47177e-09
AC083801.2	3.52089	3.1232	2.07796e-09	8.58194e-09
AC016550.2	4.07782	3.09446	2.10128e-09	8.66619e-09
LINC02476	5.69935	4.78849	2.12521e-09	8.74463e-09
AC008750.3	2.04867	3.10828	2.12677e-09	8.74698e-09
AC024230.1	4.10765	3.61063	2.14149e-09	8.80099e-09
AC084026.1	2.89388	3.17342	2.16076e-09	8.87449e-09
AC090673.2	3.34269	3.07572	2.17123e-09	8.91336e-09
AL136987.1	2.80188	3.09465	2.23972e-09	9.1776e-09
TMEM132D-AS1	5.70364	4.61807	2.27489e-09	9.30883e-09
AC104574.2	3.43123	3.56231	2.35227e-09	9.60781e-09
TTTY16	-2.15906	2.78892	2.35521e-09	9.611e-09
AC010547.2	2.4988	4.62599	2.43e-09	9.90708e-09
AP003472.2	2.07391	3.05032	2.45737e-09	1.00095e-08
AL589743.5	2.57165	3.25351	2.49597e-09	1.01621e-08
MIR4527HG	3.46434	4.31021	2.50263e-09	1.01845e-08
LINC00319	2.60893	3.36451	2.51257e-09	1.02203e-08
AC004888.1	2.93911	3.48181	2.56511e-09	1.0415e-08
AF121898.1	4.53681	3.75305	2.63322e-09	1.0672e-08
LINC01913	2.79013	5.35019	2.76162e-09	1.11721e-08
AC110015.1	3.87141	2.95998	2.78424e-09	1.12482e-08
AL442224.1	3.50319	5.53733	2.79052e-09	1.12634e-08
AC022424.1	2.04687	3.31864	2.84376e-09	1.14627e-08
AC015813.4	2.03712	3.02166	2.88189e-09	1.16111e-08
DSG1-AS1	4.72502	3.9682	2.89273e-09	1.16469e-08
AL023754.1	3.5485	3.07107	2.90619e-09	1.16931e-08
CPS1-IT1	4.67656	3.29336	2.92957e-09	1.17765e-08
AC243972.1	2.10385	2.9211	2.95358e-09	1.18677e-08
AC006065.4	3.74078	3.54045	3.01759e-09	1.2104e-08
LINC01667	5.81291	6.40862	3.0323e-09	1.21565e-08
TUSC8	3.8083	6.07549	3.04414e-09	1.21985e-08
AL133467.2	4.11946	4.34571	3.09531e-09	1.23868e-08
LINC01873	2.55769	2.9358	3.1455e-09	1.25764e-08
LINC02343	2.48483	3.0227	3.14977e-09	1.25878e-08
AC122710.1	5.32554	4.38533	3.18279e-09	1.2714e-08
AL589740.1	3.959	3.14588	3.31396e-09	1.32142e-08
AP005271.1	2.19656	3.36561	3.34775e-09	1.33311e-08
AL451137.1	3.62304	2.9416	3.51127e-09	1.39447e-08
LINC00645	4.52979	3.58041	3.59691e-09	1.42785e-08
AC008649.1	2.25684	3.85376	3.61434e-09	1.43413e-08
AL008721.1	2.8832	2.77525	3.90009e-09	1.54338e-08
LINC00393	4.81184	4.16082	3.96692e-09	1.56773e-08
AL772337.1	-2.00517	5.14726	4.12305e-09	1.62799e-08
AC099677.4	2.57387	2.64694	4.16649e-09	1.64223e-08
AC016831.5	2.69018	5.79123	4.28027e-09	1.68484e-08
AL079307.1	2.77093	3.57392	4.32713e-09	1.70178e-08
LINC02454	2.85459	4.70803	4.33846e-09	1.70548e-08
LINC02267	5.52651	4.37703	4.39461e-09	1.72596e-08
LINC01202	4.88076	3.42444	4.39639e-09	1.72596e-08
AC023154.1	2.05015	4.25014	4.4932e-09	1.76164e-08
AL592494.1	2.81331	2.60997	4.69079e-09	1.83104e-08
AL606970.3	3.18476	4.11601	4.80282e-09	1.87312e-08
AC006145.1	4.22409	3.71075	5.00678e-09	1.94669e-08
LINC01257	4.66411	5.3373	5.11534e-09	1.98456e-08
AC068858.1	2.05987	2.75266	5.39186e-09	2.0882e-08
LINC00543	2.03052	6.37652	5.47215e-09	2.11653e-08
LINC01249	4.80253	4.03278	5.59997e-09	2.16409e-08
LINC02468	2.37103	3.90688	5.71746e-09	2.20662e-08
AC123905.1	3.48974	3.0481	5.81111e-09	2.23985e-08
AC025419.1	3.91638	7.09483	5.94169e-09	2.28819e-08
AC099342.1	2.74217	2.78464	5.99527e-09	2.30783e-08
AC126323.3	3.17266	3.55545	6.03701e-09	2.32289e-08
AL109954.2	2.99895	3.07042	6.13675e-09	2.36025e-08
AC005090.1	4.9665	3.93864	6.2165e-09	2.38989e-08
LINC01446	4.46763	6.16212	6.53711e-09	2.50341e-08
LINC00330	2.14064	3.79204	6.62306e-09	2.53185e-08
AC004158.1	2.99818	3.14504	6.72873e-09	2.57015e-08
AL354824.2	2.87393	2.90429	6.89277e-09	2.63168e-08
LINC00383	4.76133	3.3405	7.08234e-09	2.69942e-08
LINC02188	3.00125	7.11709	7.12781e-09	2.71443e-08
GRM5-AS1	2.25665	3.48527	7.18319e-09	2.73435e-08
LINC01098	3.22104	3.54315	7.21461e-09	2.74513e-08
LINC01456	4.59123	3.70486	7.25539e-09	2.75829e-08
LINC01345	5.23625	4.10335	7.40129e-09	2.81015e-08
AC006357.1	3.85203	3.20409	7.42789e-09	2.81905e-08
AC005808.1	2.84237	2.78425	7.5057e-09	2.84494e-08
AC021127.1	2.34909	3.31346	7.53579e-09	2.85513e-08
AC084816.1	3.30582	3.99128	7.62348e-09	2.88712e-08
AC003986.2	2.33889	2.96378	7.82291e-09	2.9551e-08
LINC01924	4.53486	3.75295	8.57823e-09	3.22672e-08
AC092198.1	2.48628	5.30518	8.70898e-09	3.27313e-08
AC110741.1	3.02363	5.83784	8.85397e-09	3.32201e-08
AC011611.2	2.95279	2.67351	9.08567e-09	3.40321e-08
BX005019.1	3.49366	2.9065	9.4215e-09	3.52158e-08
MIR5689HG	3.07071	3.07655	9.66298e-09	3.60578e-08
AC012317.1	2.97774	3.93283	1.0122e-08	3.76741e-08
VCAN-AS1	2.52727	4.05308	1.013e-08	3.76741e-08
LINC00698	2.23562	2.79343	1.05218e-08	3.90821e-08
AC114812.2	3.22848	3.02264	1.06258e-08	3.94519e-08
AL353803.1	2.41109	2.83536	1.08802e-08	4.03627e-08
AL133467.4	4.1559	3.86039	1.12886e-08	4.18082e-08
AL359851.1	2.88692	3.03067	1.13022e-08	4.18413e-08
AC090023.2	4.55595	3.31973	1.15131e-08	4.26042e-08
AC021683.1	2.61537	6.0259	1.16483e-08	4.30867e-08
AC112178.1	4.12594	3.12139	1.18956e-08	4.39646e-08
AC008738.4	2.64006	2.95369	1.20458e-08	4.44462e-08
AL359636.2	2.13837	3.35757	1.22551e-08	4.51621e-08
AC048383.1	2.30569	3.06675	1.24295e-08	4.57478e-08
SLC8A1-AS1	2.01559	5.67811	1.30663e-08	4.79926e-08
AC025524.2	2.42358	3.17133	1.3123e-08	4.81809e-08
AC073323.1	2.31746	3.11467	1.32343e-08	4.85694e-08
AC113615.1	2.45458	2.90876	1.35063e-08	4.94861e-08
LINC00392	5.80952	4.04731	1.40145e-08	5.12636e-08
AC133540.1	2.16397	3.94746	1.43457e-08	5.24104e-08
LINC01659	2.03142	5.56174	1.45582e-08	5.31431e-08
AL157778.1	5.20437	3.98928	1.54121e-08	5.6122e-08
LINC02582	5.99801	5.56298	1.54817e-08	5.63524e-08
AC025154.2	2.16851	8.22302	1.54883e-08	5.63533e-08
AC022809.1	2.78952	2.68459	1.55768e-08	5.66521e-08
AC005307.1	3.93074	4.10025	1.56012e-08	5.6706e-08
AL513304.1	6.71438	4.81192	1.57784e-08	5.73152e-08
LINC02506	4.62797	5.33537	1.65106e-08	5.98524e-08
LINC01701	2.57653	2.88023	1.67569e-08	6.0696e-08
LINC00470	3.11256	6.11359	1.68751e-08	6.10744e-08
AC009264.1	3.57783	4.56675	1.69517e-08	6.13267e-08
FAM230C	5.34638	4.68589	1.73458e-08	6.26759e-08
AC016687.3	5.27546	4.12811	1.73885e-08	6.28047e-08
AC007848.2	3.01205	2.9255	1.7429e-08	6.29254e-08
AP003181.1	3.48882	2.7811	1.78129e-08	6.42072e-08
AC087857.1	4.09922	3.35834	1.85648e-08	6.67551e-08
AC022929.2	2.27976	2.94536	1.87774e-08	6.74924e-08
AC007785.1	2.70356	3.10704	1.89372e-08	6.79844e-08
AC131532.1	4.23158	4.6757	1.99717e-08	7.15538e-08
AC116666.1	3.67426	2.96961	2.0092e-08	7.18402e-08
AL160408.1	2.76232	5.98634	2.13795e-08	7.61988e-08
Z82173.1	3.33953	3.59213	2.16549e-08	7.71493e-08
AC083841.2	3.27334	2.85897	2.28079e-08	8.10946e-08
LINC02037	3.95749	4.89588	2.41732e-08	8.57092e-08
Z94160.1	2.19809	3.31896	2.4356e-08	8.62543e-08
PROX1-AS1	2.08155	6.19539	2.45511e-08	8.68417e-08
AC104794.3	3.96223	3.19465	2.47348e-08	8.7387e-08
AP006333.2	2.18607	2.7487	2.53436e-08	8.95024e-08
LINC00602	3.77556	3.71773	2.58455e-08	9.10221e-08
AL390718.1	2.57827	2.66027	2.64647e-08	9.31659e-08
AL138962.1	2.55936	2.93031	2.78376e-08	9.79214e-08
AC104793.1	4.92725	3.44025	2.82133e-08	9.92036e-08
AC027243.1	2.34231	3.0065	2.84806e-08	1.00064e-07
AC022639.1	4.15807	3.43457	2.84972e-08	1.00083e-07
AC010478.1	2.65592	5.65348	2.90962e-08	1.01986e-07
AP003351.1	2.25702	2.63522	2.93575e-08	1.0274e-07
AC069228.1	4.04393	3.95175	3.17078e-08	1.10548e-07
LINC02347	2.78926	3.70045	3.17129e-08	1.10548e-07
AL138759.1	2.32991	2.80741	3.26545e-08	1.13607e-07
AL157937.1	2.93546	2.92753	3.29791e-08	1.14602e-07
AL353753.1	2.15601	2.8474	3.3757e-08	1.17122e-07
LINC01956	3.76589	3.55232	3.43285e-08	1.19059e-07
AF279873.3	4.85592	4.24065	3.45729e-08	1.1986e-07
AC091043.1	2.94977	3.79081	3.49825e-08	1.21138e-07
GACAT3	4.87648	4.06239	3.62642e-08	1.25187e-07
LINC02448	4.54722	3.20247	3.79152e-08	1.30683e-07
AC126407.1	2.67123	3.02099	3.84356e-08	1.32374e-07
AC126696.2	2.16526	2.64141	3.91861e-08	1.34907e-07
RMRP	5.99063	6.42051	3.99431e-08	1.37194e-07
LINC02417	2.81581	3.61465	4.09272e-08	1.40412e-07
AC069542.1	2.21918	4.03758	4.16555e-08	1.42745e-07
LSAMP-AS1	3.06327	3.70776	4.66767e-08	1.59094e-07
AC069061.2	4.93752	3.72901	4.70381e-08	1.60203e-07
SMILR	2.90113	3.95899	4.73728e-08	1.6122e-07
LINC01096	2.59634	3.56615	4.8677e-08	1.65532e-07
AL117190.1	2.23627	4.27379	4.95449e-08	1.68354e-07
LINC00871	3.70338	4.1983	5.29829e-08	1.79831e-07
LINC01731	2.35241	2.96847	5.50209e-08	1.86392e-07
AC100774.1	2.12343	3.69114	5.51637e-08	1.86805e-07
AC068580.2	2.61209	3.0417	5.59792e-08	1.89422e-07
AC073578.2	3.55529	3.26047	5.92808e-08	2.00289e-07
AL356055.1	2.02361	3.5509	5.97721e-08	2.01796e-07
AL160408.4	3.70664	2.97331	6.03874e-08	2.03796e-07
LINC02433	2.46367	3.13915	6.25475e-08	2.10766e-07
AL391152.1	2.13093	4.84278	6.31962e-08	2.1271e-07
AC083967.1	2.55123	3.98823	6.44162e-08	2.16526e-07
AP005137.2	3.10117	3.33738	6.56419e-08	2.20442e-07
AC027088.3	3.36458	2.90688	6.58955e-08	2.21127e-07
LINC02438	3.77359	3.62676	6.64156e-08	2.22788e-07
ST8SIA6-AS1	3.25363	7.1512	6.89886e-08	2.31157e-07
LINC00473	3.65633	9.20558	7.04309e-08	2.35812e-07
AC090515.4	2.1405	5.65467	7.13233e-08	2.3871e-07
LINC01981	3.206	2.5851	7.29452e-08	2.4368e-07
AC021534.1	4.09582	2.95864	7.31641e-08	2.44228e-07
AL391811.1	3.21	3.37924	7.39119e-08	2.46539e-07
AL355607.2	2.53601	2.8203	7.3947e-08	2.46564e-07
AL359853.1	2.51694	3.73658	7.54495e-08	2.51258e-07
AP005328.2	2.93452	3.77825	7.54677e-08	2.51258e-07
AC007389.3	2.22426	2.75437	7.89932e-08	2.62112e-07
LINC01740	3.4533	5.02517	7.94691e-08	2.63593e-07
AC015712.4	2.61541	3.27344	7.95038e-08	2.6361e-07
AL136018.1	2.51924	3.71764	8.08083e-08	2.67736e-07
AC112176.1	2.93783	3.33403	8.73017e-08	2.88284e-07
AC145207.1	2.06944	2.66214	8.7612e-08	2.89201e-07
LINC01681	3.62558	3.13902	8.77708e-08	2.89618e-07
AC008392.1	2.32781	3.4537	9.25491e-08	3.05158e-07
AL121956.1	2.85418	4.23978	9.33068e-08	3.07543e-07
AC006206.1	3.03833	2.70637	9.48919e-08	3.12073e-07
LINC01910	2.5765	3.26309	9.51408e-08	3.12699e-07
LINC02105	3.41566	2.92049	9.51523e-08	3.12699e-07
AL445209.1	2.97489	2.86659	9.68288e-08	3.17738e-07
CASC20	3.52894	4.46712	9.70508e-08	3.18271e-07
OVAAL	3.08806	3.85814	9.74041e-08	3.19273e-07
LINC01812	2.59611	2.77905	9.98336e-08	3.26635e-07
AC087473.1	2.25735	2.69182	1.03207e-07	3.37425e-07
LINC02167	3.11245	2.65763	1.0607e-07	3.45893e-07
AC068985.1	3.59077	3.00145	1.07941e-07	3.51738e-07
LINC02111	2.82799	2.94369	1.08454e-07	3.53151e-07
LINC01210	4.54709	3.72122	1.08614e-07	3.5354e-07
AL034376.1	2.77614	3.30301	1.08787e-07	3.53976e-07
AL161431.1	3.01484	8.8282	1.12502e-07	3.64995e-07
LINC00308	3.22466	2.5911	1.13646e-07	3.68438e-07
AC015923.1	2.24882	3.55375	1.19939e-07	3.87993e-07
LINC01608	5.23386	4.13518	1.2762e-07	4.1209e-07
ARHGAP26-AS1	2.04784	3.82226	1.27705e-07	4.12214e-07
AC131211.1	4.07253	2.99389	1.3015e-07	4.19346e-07
AL365356.1	2.08524	4.18707	1.30278e-07	4.19607e-07
LINC01079	3.32965	4.06696	1.30969e-07	4.21681e-07
AP003062.1	4.27323	4.02838	1.32371e-07	4.26038e-07
AC108865.1	2.83909	3.21442	1.32507e-07	4.26322e-07
AC004704.1	4.51139	5.00175	1.36714e-07	4.39539e-07
KC877982.1	4.43115	3.6829	1.37298e-07	4.41099e-07
LINC01204	2.50468	3.93838	1.39265e-07	4.46748e-07
LINC02196	3.65932	3.00607	1.39307e-07	4.46748e-07
AL590637.1	2.38823	3.49589	1.42619e-07	4.57039e-07
AC090503.2	3.37054	2.64335	1.48769e-07	4.7572e-07
AC008554.1	2.16281	3.52655	1.51685e-07	4.84348e-07
AL161729.2	2.5088	3.32358	1.62768e-07	5.17692e-07
AC092916.1	4.36133	3.1075	1.6808e-07	5.32871e-07
AC022031.2	3.65513	3.94701	1.7271e-07	5.46638e-07
FGF12-AS2	2.38315	3.28292	1.72729e-07	5.46638e-07
AC007383.4	4.77491	4.89786	1.73198e-07	5.47733e-07
AC053503.1	2.23969	2.74474	1.79817e-07	5.67857e-07
HOTTIP	3.54486	3.6973	1.82976e-07	5.77015e-07
AC027514.1	2.0078	3.6675	1.83385e-07	5.78097e-07
AC090164.2	2.28884	3.41866	1.83711e-07	5.7892e-07
AC019211.1	2.447	2.70943	1.84929e-07	5.82345e-07
AC106875.1	4.29752	5.27884	1.90051e-07	5.97631e-07
AL049775.2	3.86952	3.21555	1.90442e-07	5.98648e-07
AC124290.1	3.92013	2.89054	1.98782e-07	6.23543e-07
AC091868.2	2.00242	2.7834	2.00852e-07	6.28925e-07
AC131097.1	2.28693	3.40113	2.12995e-07	6.6531e-07
AC012594.1	2.28396	2.9365	2.16705e-07	6.76423e-07
AL391361.3	4.47692	3.35715	2.24587e-07	6.9931e-07
AC091173.1	2.82723	4.06486	2.27057e-07	7.06752e-07
CR392039.3	3.61053	3.13446	2.28944e-07	7.12127e-07
AC007159.1	4.5742	4.40317	2.29877e-07	7.1453e-07
AC007431.2	3.10101	2.6565	2.36748e-07	7.34604e-07
LINC01346	4.50483	4.19478	2.38509e-07	7.39633e-07
AC013724.1	3.0456	2.77367	2.53122e-07	7.82139e-07
SCHLAP1	4.01843	3.15298	2.55571e-07	7.8943e-07
CHODL-AS1	2.96209	2.86297	2.56378e-07	7.91649e-07
AL162413.1	3.16423	4.25229	2.58228e-07	7.96255e-07
FOXP1-IT1	2.33089	4.76094	2.61008e-07	8.04548e-07
AL354824.1	2.43917	2.68407	2.63111e-07	8.10469e-07
LINC01297	3.64076	3.27055	2.63514e-07	8.11431e-07
NHS-AS1	2.40605	2.78462	2.6367e-07	8.11628e-07
AC007431.1	2.28699	3.23527	2.74369e-07	8.43397e-07
C11orf44	2.3352	3.24255	2.79272e-07	8.57875e-07
LINC01992	4.28979	4.09409	2.85795e-07	8.77307e-07
AC012174.1	2.91119	4.4023	2.87358e-07	8.81799e-07
LINC01831	4.94827	3.42926	2.89263e-07	8.87339e-07
AC090541.1	2.93196	4.05946	2.92089e-07	8.95391e-07
AC073525.1	3.01924	3.38085	2.94568e-07	9.02056e-07
AC105999.2	4.94028	4.33058	3.09645e-07	9.46273e-07
AC011287.1	2.33023	3.30024	3.10052e-07	9.47193e-07
AC073365.1	4.82458	4.61063	3.13233e-07	9.55926e-07
AL022314.1	2.42644	3.09385	3.15594e-07	9.61811e-07
AC104088.1	3.00828	3.9905	3.27897e-07	9.98278e-07
LINC01896	5.07308	4.23108	3.30016e-07	1.00404e-06
AC091987.1	3.71126	3.05918	3.35002e-07	1.01817e-06
LINC01312	3.3162	3.31231	3.44603e-07	1.04663e-06
AC005550.2	2.96562	5.58068	3.50651e-07	1.06428e-06
LINC02141	3.909	3.54161	3.5087e-07	1.06458e-06
C3orf67-AS1	2.78338	2.60239	3.58353e-07	1.08617e-06
AL445531.1	2.14411	2.95363	3.91317e-07	1.17965e-06
AC103957.1	2.19182	2.69342	3.98932e-07	1.2022e-06
LINC01502	2.86856	5.05672	3.99851e-07	1.20456e-06
AL450345.1	3.2662	3.04484	4.18151e-07	1.25774e-06
CU104787.1	3.89956	2.86625	4.22056e-07	1.26888e-06
AC011287.2	2.81405	3.2418	4.31314e-07	1.2954e-06
LINC01391	3.42524	3.23374	4.48428e-07	1.34407e-06
AC006372.1	3.42854	3.44399	4.5595e-07	1.3634e-06
AC016710.1	3.94215	2.90115	4.61411e-07	1.37927e-06
LINC02327	4.04301	4.08286	4.72673e-07	1.41151e-06
LINC01221	3.49428	2.72525	5.26581e-07	1.56409e-06
AC005150.1	3.74976	2.78395	5.53015e-07	1.63715e-06
AC109830.1	4.22635	3.15222	5.71733e-07	1.68862e-06
AC010327.3	2.06001	3.35978	5.73366e-07	1.69288e-06
AL451047.1	2.59574	3.16216	5.76528e-07	1.70166e-06
AP000439.2	3.14248	4.5547	5.80124e-07	1.7117e-06
LINC01819	2.82161	6.54142	5.80987e-07	1.71311e-06
AC023824.5	5.34931	3.90627	6.26657e-07	1.84167e-06
GRM7-AS3	3.06117	2.54098	6.31418e-07	1.85444e-06
AC091182.2	2.09027	3.88248	6.31958e-07	1.8548e-06
AP000688.2	2.64422	5.7721	6.63026e-07	1.93895e-06
LINC01411	2.70597	3.07181	6.73784e-07	1.96653e-06
LINC02463	2.34259	2.91115	6.80729e-07	1.98485e-06
LINC01444	3.65809	3.97656	6.81593e-07	1.98671e-06
AP000851.2	2.54561	4.03546	7.01135e-07	2.04033e-06
AL391097.1	3.03733	2.76424	7.0855e-07	2.05989e-06
AC107419.1	2.78021	3.48478	7.31005e-07	2.1224e-06
AC073530.1	2.93269	2.5741	7.33926e-07	2.12949e-06
IL20RB-AS1	2.41609	2.77095	7.69138e-07	2.22368e-06
AC148477.4	3.19504	3.95858	7.71516e-07	2.22983e-06
AC008443.3	2.2996	3.96067	7.78907e-07	2.24973e-06
AC100800.1	3.21282	3.86429	7.96743e-07	2.299e-06
AC100782.1	2.30944	3.14361	8.16473e-07	2.35441e-06
AC108174.1	2.19993	2.96412	8.19462e-07	2.36226e-06
AC005722.2	2.26517	5.41837	8.29535e-07	2.3882e-06
TESC-AS1	2.20758	3.79015	8.31885e-07	2.39419e-06
RBAKDN	2.00642	4.10762	8.40815e-07	2.41911e-06
AC007529.1	2.51004	2.60461	8.4432e-07	2.42841e-06
OTX2-AS1	3.14285	3.43153	8.4856e-07	2.43981e-06
AC016868.1	3.28581	3.06066	8.50126e-07	2.44353e-06
BX324167.1	2.10583	3.6682	8.53065e-07	2.45118e-06
AC127029.2	2.97225	3.12158	8.78472e-07	2.52012e-06
AC112495.1	5.19572	4.11887	8.89952e-07	2.55058e-06
AL035401.1	2.34558	3.45655	9.00777e-07	2.57994e-06
LINC02505	3.4511	3.28011	9.47255e-07	2.70609e-06
LINC01885	3.15095	2.57084	9.50621e-07	2.71484e-06
AC132807.2	3.29032	3.96828	1.02562e-06	2.91684e-06
AC002511.2	2.43516	4.08375	1.04208e-06	2.95893e-06
AC006148.1	2.93637	3.37672	1.06574e-06	3.0242e-06
AL592043.1	3.1617	2.72436	1.09172e-06	3.09101e-06
AC091133.2	3.65491	2.81749	1.10097e-06	3.11521e-06
LINC01959	2.96017	2.59201	1.10822e-06	3.13373e-06
PAQR9-AS1	3.67057	3.76679	1.11683e-06	3.15508e-06
LINC00705	2.45737	3.06978	1.14516e-06	3.231e-06
LINC01143	2.49045	3.60332	1.20183e-06	3.38125e-06
ZBTB46-AS1	2.53725	3.47964	1.20536e-06	3.3901e-06
NAALADL2-AS3	3.18601	2.8499	1.26086e-06	3.53391e-06
AL136131.2	2.59109	3.05429	1.28387e-06	3.59048e-06
AP000904.1	2.36922	4.42565	1.31485e-06	3.6702e-06
LINC01854	3.55003	2.77818	1.34565e-06	3.74911e-06
AC092325.1	3.33367	2.6295	1.39421e-06	3.87589e-06
AL591926.2	2.10891	2.89883	1.43376e-06	3.97839e-06
AC073174.1	3.91898	3.32544	1.43623e-06	3.98277e-06
AC005186.1	3.67096	3.01399	1.46549e-06	4.0601e-06
AC139718.1	3.26345	2.81552	1.50992e-06	4.17928e-06
AC139792.1	2.41221	3.35687	1.56022e-06	4.31181e-06
LINC02411	3.45119	2.71351	1.56671e-06	4.32706e-06
E2F3-IT1	2.85422	2.89899	1.58098e-06	4.36375e-06
MACC1-AS1	2.248	3.95678	1.59549e-06	4.40109e-06
LINC02294	2.75405	2.87949	1.61583e-06	4.45094e-06
LINC00051	2.89768	3.49939	1.62878e-06	4.48457e-06
FGF12-AS3	2.39395	2.88899	1.64895e-06	4.52945e-06
AC074389.2	3.49625	3.60506	1.69294e-06	4.64398e-06
AL356364.1	4.22419	3.11072	1.70608e-06	4.67713e-06
AL391863.2	3.66123	3.40558	1.73303e-06	4.74809e-06
AC020551.1	3.45283	2.67188	1.76513e-06	4.8286e-06
AC009884.1	2.97183	3.02387	1.79142e-06	4.89815e-06
AC105460.1	4.61034	3.79482	1.79166e-06	4.89815e-06
LINC01697	2.401	4.71065	1.83466e-06	5.01418e-06
AC112236.1	2.6526	3.07464	1.84249e-06	5.03403e-06
AC012065.1	3.6076	2.73452	1.8791e-06	5.12776e-06
AC209154.2	3.97024	3.34835	1.89123e-06	5.15927e-06
IGF2-AS	2.56861	4.63785	1.89446e-06	5.1665e-06
AL359095.1	3.47882	3.57738	1.8953e-06	5.16722e-06
AC021818.1	2.09641	2.78164	1.91766e-06	5.22657e-06
AC090193.1	2.30948	2.56171	1.97899e-06	5.38548e-06
LINC02527	3.33054	3.39424	2.0267e-06	5.51024e-06
AC097716.1	2.67396	2.71774	2.10255e-06	5.70426e-06
AL359551.1	2.46691	3.14179	2.11927e-06	5.74261e-06
LINC01593	2.28916	2.71819	2.15732e-06	5.83862e-06
AC026320.1	3.16995	2.57869	2.16547e-06	5.85888e-06
LINC01665	3.34292	2.97525	2.16814e-06	5.86434e-06
PLCB1-IT1	3.50719	2.73871	2.20335e-06	5.94871e-06
AC087258.1	2.98113	3.01024	2.22157e-06	5.99608e-06
AP001025.1	2.20185	3.80202	2.25721e-06	6.08304e-06
AC093817.1	2.09817	2.9039	2.29414e-06	6.17508e-06
AC099788.1	2.66731	2.78183	2.34278e-06	6.30221e-06
AF178030.1	3.2495	3.34993	2.40471e-06	6.46099e-06
AC087612.1	3.10784	3.68472	2.46724e-06	6.619e-06
AF254983.1	3.81948	2.97642	2.52791e-06	6.7695e-06
AC006262.2	2.28092	2.6458	2.6099e-06	6.97018e-06
AC092803.1	2.25282	2.81358	2.71438e-06	7.2275e-06
GACAT2	2.02297	3.20445	2.71788e-06	7.23466e-06
AL008638.2	4.34544	3.19374	2.83094e-06	7.51538e-06
AL353746.1	2.33553	4.31499	2.88436e-06	7.64579e-06
LINC02300	2.49911	5.66867	2.88636e-06	7.64653e-06
AC133106.1	2.8472	2.68398	2.96777e-06	7.85519e-06
AC074237.1	3.49331	2.79099	3.02681e-06	8.00193e-06
RAPGEF4-AS1	2.38461	3.07552	3.23843e-06	8.54362e-06
AC148477.2	2.39095	3.95516	3.24292e-06	8.55292e-06
AC096721.1	2.79066	2.46705	3.43977e-06	9.0426e-06
LINC01433	2.242	4.13534	3.45043e-06	9.06526e-06
AL031767.1	4.31094	3.47265	3.52904e-06	9.2636e-06
AL583808.1	3.03151	3.9866	3.54386e-06	9.29976e-06
LINC02260	2.67942	2.86176	3.55688e-06	9.32568e-06
AC008060.1	3.52284	2.81382	3.56882e-06	9.35422e-06
AF131216.3	2.59002	3.77693	3.57879e-06	9.3694e-06
AC013391.3	2.64753	2.62843	3.57883e-06	9.3694e-06
AC090774.3	2.85161	3.09107	3.5868e-06	9.38753e-06
LINC01250	2.20402	2.84165	3.632e-06	9.49465e-06
AC023824.1	4.44456	4.43821	3.69693e-06	9.65871e-06
Z97206.2	2.08004	2.55714	3.83318e-06	9.99121e-06
AC004080.2	3.11246	2.77853	3.90803e-06	1.01744e-05
AL356311.1	2.58121	2.58664	4.1162e-06	1.06976e-05
AC105760.1	2.21254	2.8381	4.16114e-06	1.08049e-05
AC009135.1	3.09229	2.56816	4.16951e-06	1.08234e-05
AC025183.1	3.46501	2.86297	4.18449e-06	1.08575e-05
AC022173.1	2.42232	3.74525	4.18507e-06	1.08575e-05
AF106564.1	2.29843	3.95362	4.19177e-06	1.08717e-05
AC008063.2	2.14301	3.14459	4.3029e-06	1.11502e-05
AC078950.1	2.32296	2.84538	4.40077e-06	1.13839e-05
MRGPRG-AS1	3.29709	2.81398	4.40475e-06	1.13909e-05
PCAT18	2.31777	4.88622	4.41776e-06	1.14146e-05
IDH2-DT	2.32797	3.36563	4.43379e-06	1.14527e-05
LINC02266	2.7778	4.51653	4.50668e-06	1.16274e-05
LINC02385	3.42639	3.88267	4.54497e-06	1.1716e-05
AF130417.1	2.8943	2.66924	4.64136e-06	1.19368e-05
AL353803.2	2.13141	3.92669	4.73867e-06	1.21797e-05
AL138974.1	3.55008	3.27794	4.78537e-06	1.22895e-05
AC093730.1	3.54802	3.00369	4.87858e-06	1.25072e-05
SNHG27	3.22794	3.3529	4.91043e-06	1.25816e-05
AC096577.1	2.52219	3.27721	4.92475e-06	1.26078e-05
AL133343.2	2.0396	2.983	4.98122e-06	1.27446e-05
AC010486.3	2.9474	2.52242	5.21459e-06	1.3311e-05
AC017048.3	2.16629	3.75606	5.29052e-06	1.34894e-05
AC005828.2	2.30453	3.0161	5.31478e-06	1.35474e-05
AC025575.1	2.51534	2.66304	5.57602e-06	1.41767e-05
LINC02303	3.61391	4.02663	5.61606e-06	1.42663e-05
LINC00879	4.1802	3.189	5.63566e-06	1.42979e-05
LINC00456	2.46433	2.54643	5.63654e-06	1.42979e-05
LINC01886	3.83884	4.25237	5.68131e-06	1.44032e-05
LINC02443	2.33633	2.71954	5.82594e-06	1.47489e-05
AC139722.1	2.91183	2.70124	5.8373e-06	1.47711e-05
AC034223.1	2.87254	2.80945	5.87703e-06	1.48613e-05
LINC02348	2.1715	2.88697	5.89123e-06	1.48887e-05
AC092801.1	2.16688	3.91559	5.97338e-06	1.50835e-05
LINC01322	2.90645	4.62464	6.04942e-06	1.52582e-05
LINC01448	3.16096	2.71031	6.07843e-06	1.5327e-05
TDRG1	2.76856	2.79053	6.209e-06	1.56268e-05
AC093702.1	2.13078	3.46599	6.20963e-06	1.56268e-05
LINC01744	2.41025	2.63658	6.22606e-06	1.56593e-05
AP001547.1	2.51185	2.8975	6.24371e-06	1.56948e-05
AL078601.2	2.2192	4.62592	6.25411e-06	1.57165e-05
LINC02078	2.05652	3.89009	6.25842e-06	1.57176e-05
AC015818.2	2.02284	2.62356	6.25984e-06	1.57176e-05
AC008456.1	2.14562	2.52149	6.57025e-06	1.64506e-05
AP002833.2	3.10044	2.78792	6.61596e-06	1.65464e-05
AC117465.1	2.60077	2.82105	6.64005e-06	1.65973e-05
AC037487.2	2.52361	3.66455	6.64988e-06	1.66172e-05
AL513324.1	2.81883	2.59874	6.85627e-06	1.71041e-05
LINC02470	2.94409	4.16076	6.90023e-06	1.7209e-05
AL132709.1	3.40758	2.84522	7.09806e-06	1.76825e-05
LINC02533	2.428	3.76856	7.22918e-06	1.7974e-05
LINC00867	2.14226	3.30509	7.24092e-06	1.79981e-05
AC002463.1	3.32739	2.93777	7.43967e-06	1.84612e-05
CYMP-AS1	2.80765	4.49435	7.47965e-06	1.85552e-05
AC068535.1	3.883	2.82084	7.63875e-06	1.89442e-05
AL133372.2	3.09828	2.98682	7.65553e-06	1.89704e-05
AC091151.1	3.05593	2.78618	7.86692e-06	1.94508e-05
AC106744.1	4.13638	3.20214	7.9266e-06	1.95848e-05
AL162584.1	2.45644	3.05919	7.96446e-06	1.96701e-05
AC114912.1	2.80357	2.60286	7.97861e-06	1.96996e-05
AL513164.1	2.3185	2.93323	8.21973e-06	2.02388e-05
LINC01087	2.63164	3.21229	8.26681e-06	2.03491e-05
LINC02046	3.38589	3.13572	8.69289e-06	2.13506e-05
AC011483.1	2.62829	2.82615	8.75087e-06	2.14812e-05
AC040963.1	2.89333	2.90672	8.7716e-06	2.15261e-05
MIR7-3HG	2.98542	4.10925	8.92326e-06	2.18923e-05
AC018541.1	4.52717	3.38426	8.92686e-06	2.1895e-05
FP236383.1	2.55076	3.23969	9.03896e-06	2.21632e-05
AC007993.2	2.97551	3.86524	9.05948e-06	2.2202e-05
AC093001.1	3.7972	5.26349	9.54892e-06	2.32732e-05
AC015574.1	3.94801	3.46645	9.73378e-06	2.36913e-05
AC004009.1	3.43111	2.73062	9.93393e-06	2.41322e-05
AC025211.1	2.1585	2.88555	1.00017e-05	2.42836e-05
AL033504.1	2.74607	4.30825	1.00822e-05	2.44657e-05
EPHA5-AS1	2.9996	3.36518	1.03111e-05	2.50006e-05
AP000997.1	2.35342	2.53906	1.04002e-05	2.51962e-05
LINC02315	2.11962	6.02772	1.07941e-05	2.61221e-05
AC007494.2	2.00985	3.45683	1.09591e-05	2.65068e-05
AC106744.2	3.67386	2.96129	1.1081e-05	2.67798e-05
AC099673.1	2.94937	2.51422	1.11712e-05	2.69758e-05
AL512363.1	2.20723	3.24648	1.13071e-05	2.72671e-05
AC008277.1	2.03147	4.18867	1.15964e-05	2.79193e-05
AC108865.2	2.24987	2.58536	1.18597e-05	2.84991e-05
AC131182.1	2.27662	3.62785	1.19418e-05	2.86795e-05
LINC02307	3.21775	2.83504	1.19525e-05	2.86912e-05
AL161938.1	2.89252	2.72108	1.20262e-05	2.8852e-05
AC010145.1	3.74593	2.79154	1.21023e-05	2.90037e-05
AC068389.4	2.34263	3.06091	1.25667e-05	3.00611e-05
LINC02522	3.2105	3.18267	1.28452e-05	3.06686e-05
AC109439.2	2.92774	2.97291	1.37801e-05	3.27951e-05
AC096669.1	2.93289	2.58402	1.41512e-05	3.36421e-05
MIR4300HG	2.58895	2.81893	1.43345e-05	3.40506e-05
LINC01788	2.92265	2.86933	1.45634e-05	3.45391e-05
AC103853.1	2.43075	2.85764	1.54767e-05	3.6588e-05
AC112493.1	2.36348	3.15552	1.60361e-05	3.78301e-05
AC073651.1	2.4772	3.76484	1.6897e-05	3.97239e-05
AC239800.2	2.00644	4.29953	1.73572e-05	4.07628e-05
AF127577.2	2.06522	3.80107	1.74372e-05	4.09399e-05
AC025254.1	3.31456	2.72915	1.77598e-05	4.16424e-05
AC084819.1	2.58677	2.66423	1.91725e-05	4.47074e-05
DPYD-AS2	2.671	3.74614	1.92253e-05	4.48071e-05
AL358394.1	2.2306	3.59168	2.02875e-05	4.71098e-05
AL161668.1	3.61731	3.07709	2.04735e-05	4.7492e-05
LINC02282	3.01224	2.60344	2.11003e-05	4.88061e-05
CACNA1C-IT3	3.00841	2.62388	2.11089e-05	4.88134e-05
ZBTB20-AS5	2.52295	4.06278	2.12501e-05	4.90888e-05
SOX1-OT	3.10956	2.8778	2.17011e-05	5.00136e-05
AC063926.1	2.49783	2.77893	2.23414e-05	5.14362e-05
B3GALT5-AS1	2.1754	5.86552	2.25424e-05	5.1872e-05
LINC01551	2.92	3.00016	2.26137e-05	5.20226e-05
AC020687.1	3.00474	2.7025	2.40056e-05	5.50255e-05
AC003958.2	2.39499	2.87551	2.42011e-05	5.54592e-05
AC007368.2	2.24529	2.66124	2.54817e-05	5.81841e-05
LINC02584	2.02264	3.12114	2.58811e-05	5.90355e-05
AC131902.1	2.13157	3.77014	2.6565e-05	6.04251e-05
PHACTR2-AS1	2.11977	3.59782	2.66101e-05	6.05122e-05
AC046158.1	2.06493	3.22263	2.66841e-05	6.06493e-05
DIO2-AS1	2.20462	2.54551	2.72998e-05	6.19539e-05
AL391863.1	2.47588	3.30581	2.8399e-05	6.42844e-05
AL139120.1	2.95867	3.20152	2.99212e-05	6.74726e-05
AL162582.1	3.8773	3.13762	3.0798e-05	6.93443e-05
AP000997.2	2.11103	2.7357	3.16897e-05	7.12798e-05
LINC01940	2.1673	4.0356	3.34086e-05	7.48246e-05
AC005722.3	2.218	3.65155	3.37184e-05	7.54234e-05
LINC01976	2.19847	2.65566	3.5027e-05	7.82128e-05
AC010857.1	2.83249	2.73924	3.59083e-05	8.00602e-05
AC092800.1	2.10503	2.72845	3.64481e-05	8.12229e-05
EGLN3-AS1	2.22557	2.63238	3.66416e-05	8.15725e-05
AC104232.2	2.84688	2.92718	3.67162e-05	8.1718e-05
AC111000.4	2.57235	3.61	3.81015e-05	8.45687e-05
FER1L6-AS1	3.32798	3.19707	3.82436e-05	8.48417e-05
AC010609.1	2.11645	2.70599	4.01785e-05	8.88683e-05
AC012506.3	2.60058	2.63983	4.08135e-05	9.02055e-05
AC116096.1	2.02353	2.65387	4.27296e-05	9.42062e-05
AC007533.1	2.0121	3.16606	4.45116e-05	9.80137e-05
C10orf71-AS1	2.14965	3.25384	4.50206e-05	9.90854e-05
AL591501.1	2.71716	3.49353	4.56297e-05	0.000100302
AL034349.1	2.64123	3.1957	4.61884e-05	0.000101405
AC002351.1	2.3711	3.30989	4.67142e-05	0.000102508
AC010099.4	2.05769	3.42422	4.74218e-05	0.00010401
AC110813.1	2.74848	3.85489	4.78322e-05	0.000104858
AL360091.2	2.25535	3.05094	4.95922e-05	0.000108556
AC087482.1	2.10944	3.36736	4.97383e-05	0.000108849
AC012339.1	3.16218	2.76325	5.01369e-05	0.000109667
AC000061.1	2.31457	4.2225	5.10477e-05	0.000111523
LINC01470	2.11802	2.79811	5.11499e-05	0.000111664
LINC02128	2.41445	3.13701	5.16645e-05	0.000112732
LINC00200	3.33731	4.86362	5.2187e-05	0.000113788
AC138761.3	2.21687	2.62052	5.33936e-05	0.000116191
DSCR10	2.5398	2.62752	5.43377e-05	0.000118072
AC007731.1	2.24409	2.87065	5.46553e-05	0.000118704
ASTN2-AS1	2.29205	2.90716	5.72178e-05	0.000123967
DANT1	2.51953	2.76771	5.73977e-05	0.000124327
AC117500.1	2.2309	3.05027	6.13018e-05	0.000132076
LINC00488	2.95164	3.07368	6.29872e-05	0.000135576
LINC00440	2.4773	2.86538	6.68397e-05	0.00014359
AC100801.1	2.32624	3.35365	6.86824e-05	0.000147264
LINC01179	2.19463	2.80779	6.93998e-05	0.000148659
AC018442.2	2.25612	2.67023	6.94886e-05	0.000148813
LINC01192	2.7443	2.9253	6.96304e-05	0.000149045
MTOR-AS1	2.02095	2.81212	7.18976e-05	0.000153566
AC012568.1	2.60135	3.024	7.48669e-05	0.000159334
LINC02310	2.3418	2.68038	7.50915e-05	0.000159736
AC012363.1	2.6904	2.6486	7.6372e-05	0.000162265
AC245128.1	3.52093	3.31357	7.85303e-05	0.000166533
LINC01574	2.18591	2.70012	8.1624e-05	0.000172641
LINC02228	2.22121	3.45443	8.17924e-05	0.000172915
LINC02312	2.28529	2.68866	8.38652e-05	0.000177086
LINC01425	3.08167	2.9601	8.40734e-05	0.000177479
AC110921.1	2.13834	2.70424	8.63841e-05	0.000181887
ARHGEF3-AS1	2.47741	2.57365	8.83612e-05	0.000185874
AC009646.2	2.54369	3.51346	8.86827e-05	0.000186462
FP236383.3	3.72561	4.41288	9.13786e-05	0.000191452
AC036222.1	2.55111	4.07051	9.1706e-05	0.000192047
AL139393.1	2.5508	3.67933	9.43233e-05	0.000197157
AC007448.2	2.16484	2.83523	9.45825e-05	0.000197652
LINC01443	2.31014	4.15795	9.58016e-05	0.000200012
AL021395.1	2.69373	4.17676	9.73388e-05	0.00020284
AC103409.1	2.72543	2.99142	0.000101547	0.000211017
AC079866.2	2.10196	2.87514	0.000101994	0.000211897
LINC00485	2.15239	2.91546	0.000103415	0.000214548
AC010967.1	2.32431	2.74559	0.000103675	0.00021501
AP001803.2	2.22424	3.21539	0.000103686	0.00021501
LINC02055	2.02521	4.90396	0.000111127	0.000229744
AC113398.2	3.05294	2.83709	0.000111285	0.000230017
AC104982.1	2.05134	3.08532	0.0001117	0.000230821
MIR124-2HG	2.81553	2.48945	0.000112544	0.000232456
AP000844.2	2.15336	4.83388	0.000116406	0.000239933
AC092447.5	2.36366	3.85873	0.000117224	0.000241395
LINC01580	2.67571	2.60697	0.000117442	0.000241731
AL365258.1	2.6028	2.78585	0.000121733	0.000250101
AC060834.2	2.70823	2.71589	0.000127765	0.000261587
FP671120.3	2.0447	3.15519	0.000130292	0.000266392
MIR3976HG	3.31494	2.89073	0.00013489	0.000275478
AL157402.2	2.83014	3.62415	0.000137175	0.000280079
AC130895.1	2.51723	3.48995	0.00014263	0.000290419
AC106873.1	2.06068	3.35378	0.000143929	0.000292929
AL079304.1	2.52692	2.57381	0.000144997	0.0002949
AC009686.1	2.05812	2.76848	0.000147046	0.000298771
AL445223.1	2.19864	3.53601	0.00014799	0.00030037
AC090220.1	2.41525	3.31925	0.000149028	0.000302338
AC105031.2	3.19754	2.9204	0.000150428	0.000305039
MIR670HG	2.73628	3.05541	0.000157521	0.000318768
AC016716.2	2.60429	2.485	0.00016359	0.000329626
AC008517.1	2.95685	2.70877	0.000166538	0.00033511
AP000462.2	3.00049	3.43039	0.000178692	0.000357465
AP003108.1	2.20087	3.85032	0.000181774	0.000363221
AL390774.2	2.13491	2.87596	0.000187472	0.000373768
AL596442.1	2.42345	2.76085	0.000188912	0.000376385
LINC02027	2.00643	2.76641	0.000202863	0.000401968
LINC01475	2.70132	2.87841	0.000216705	0.000426883
AC023905.1	2.25991	2.57154	0.00021818	0.000429408
AL513188.1	2.14	2.66108	0.000222764	0.000437675
AC125616.1	2.06693	2.68848	0.000240533	0.000471133
LINC02437	2.91661	3.04441	0.000255239	0.000497722
AC096741.1	2.54743	3.79488	0.000257421	0.000501757
LPP-AS1	2.55154	3.22944	0.000267987	0.000520868
LINC01040	2.9134	2.59502	0.000276712	0.000535835
AL121900.1	2.19934	2.75732	0.000278363	0.000538564
AC093903.1	2.41252	4.07368	0.000283448	0.000547449
AC015522.1	2.48816	2.61973	0.000283714	0.000547845
AC022201.1	2.34158	2.69511	0.000287061	0.000554187
LINC01878	2.17102	2.46091	0.000311258	0.000598174
LINC02241	2.59861	5.73205	0.000336404	0.000642807
AC106876.1	2.34783	4.63564	0.000345587	0.000659165
AC098868.1	2.4063	2.66671	0.000347945	0.000662809
AC009313.1	2.18588	2.61043	0.000363073	0.000689855
AC144521.1	2.46279	2.73876	0.000370635	0.000703171
BIRC6-AS1	2.24745	3.04019	0.00037386	0.000708988
LINC01158	2.93449	3.38175	0.000374804	0.000710625
LINC02008	2.5302	2.86488	0.0004431	0.00083108
AC107886.1	2.15704	2.76708	0.00044697	0.000838041
AL022313.4	2.79364	3.08984	0.00046112	0.000862515
ATG10-AS1	2.4659	2.56069	0.000487393	0.000907271
AC023824.3	2.36417	2.78851	0.000557261	0.00102744
AC008060.4	2.44467	2.83701	0.00059181	0.00108551
AP000462.1	2.19002	3.48868	0.000597998	0.00109596
AC090116.1	2.13557	2.72243	0.000610507	0.00111729
AL139002.1	2.67814	3.25482	0.000619423	0.00113219
LINC01205	2.29553	3.08898	0.000650359	0.00118533
LINC02050	2.13378	3.0429	0.000667943	0.00121563
AL035634.1	2.09303	2.95365	0.000708915	0.00128416
HECW1-IT1	2.1246	2.46514	0.000718303	0.00130064
MAGI1-AS1	2.02374	3.44682	0.000756681	0.00136623
AL357033.2	2.1713	2.84788	0.000781395	0.00140771
SLC9A9-AS1	2.07054	2.50392	0.000804296	0.00144575
AL031658.2	2.56255	3.07665	0.000874751	0.00156292
AC099313.1	2.14785	2.45401	0.000887457	0.00158335
AC100763.1	2.37954	2.95034	0.000888217	0.0015838
AC016493.1	2.30527	2.89444	0.000903981	0.00161062
AC023347.1	2.22458	3.05256	0.000911298	0.00162268
AC105150.1	2.04993	2.64644	0.000947153	0.00168282
AC068643.1	2.2723	5.1176	0.000969119	0.00171807
AL117341.1	2.22532	2.53067	0.00102189	0.00180372
AC090753.1	2.39488	2.74344	0.00104904	0.00184908
AC008568.1	2.51194	2.91325	0.00110712	0.00194451
AP001970.1	2.10035	2.51141	0.00112784	0.00197895
AC103770.1	2.27176	3.28478	0.00113831	0.00199653
LINC01793	2.67379	3.3924	0.001148	0.00201273
AC090802.1	2.27271	2.70331	0.00117284	0.00205265
AP000897.1	2.15494	2.73547	0.00117537	0.00205667
AC090707.1	2.08874	2.73767	0.00139116	0.00240867
AC104137.1	2.175	2.65825	0.00140438	0.00242967
AC013437.1	2.26616	2.59965	0.00168101	0.00287693
AC016576.1	2.08189	2.62009	0.00183216	0.00311642
AC055733.2	2.17236	2.46309	0.00186271	0.00316535
CACNA1C-AS4	2.14157	3.14938	0.00203832	0.00343881
AL391095.2	2.1775	2.75674	0.00221863	0.00371834
ZBTB20-AS3	2.20544	2.85253	0.00225661	0.00377914
AL139042.1	2.01822	3.02066	0.00254759	0.00422824
AC012404.1	2.06569	2.89822	0.00290472	0.00477199
AC022537.1	2.38993	2.76995	0.0030488	0.00498844
AL589863.1	2.2412	3.14736	0.00306566	0.00501418
AC069079.1	2.15188	2.70313	0.00340747	0.00553357
AC013286.1	2.02355	2.5393	0.00442961	0.00704853
LINC02106	2.37342	3.37991	0.00525015	0.00824373
AC008808.2	2.05712	3.56226	0.00547565	0.00858199

## Sheet: Table S2 LUSC
lncRNA	logFC	logCPM	PValue	FDR
AC093110.1	-3.90903	7.63463	7.1744491490182e-315	6.3472351621364e-311
LANCL1-AS1	-4.22184	6.47518	7.19974e-290	3.18481e-286
AL606469.1	-5.49716	5.63179	6.9533e-204	2.05053e-200
AC027288.3	-4.23466	7.2413	8.55e-201	1.89105e-197
AC112206.2	-3.81853	5.65543	6.33119e-191	1.12024e-187
AC116407.1	-4.12758	6.91271	2.76286e-188	4.07384e-185
LINC00968	-4.43569	7.10998	1.05252e-180	1.33023e-177
AL445307.1	-4.23646	3.3523	1.44154e-180	1.59416e-177
ADAMTS9-AS2	-3.64197	6.10129	1.0611e-179	1.04307e-176
AL590226.1	-4.45037	5.59459	2.70662e-178	2.39454e-175
AP001189.1	-4.03987	6.19295	3.54933e-172	2.85463e-169
AP000866.2	-3.19426	5.97647	1.97762e-170	1.458e-167
AC104984.4	-4.67364	3.89258	2.04453e-167	1.39138e-164
HID1-AS1	-4.08148	4.53311	1.35621e-164	8.5703e-162
MIR3945HG	-4.30968	6.44155	1.83597e-155	1.08286e-152
AC135012.3	-5.11412	4.64573	1.85077e-148	1.02336e-145
LINC01082	-4.56331	3.8192	3.63501e-145	1.8917e-142
AC005884.1	-3.9355	3.53339	1.22118e-142	6.00208e-140
LINC02016	-6.38919	5.21597	2.73377e-142	1.27293e-139
ADAMTS9-AS1	-4.06048	6.67277	6.39739e-142	2.82989e-139
AC011511.5	-4.19729	7.60912	2.32385e-139	9.79006e-137
FENDRR	-4.13514	9.92186	9.613e-139	3.86574e-136
AC005856.1	-3.12357	3.82941	8.30228e-138	3.19349e-135
AC037459.2	-2.24909	6.63672	4.29668e-135	1.5407e-132
AC087521.1	-3.88834	5.69143	4.35373e-135	1.5407e-132
AC096921.2	-3.02473	6.41196	1.27131e-134	4.32589e-132
AC018647.1	-3.71605	4.97707	1.19111e-130	3.90287e-128
AL133355.1	-2.44789	8.40849	3.32029e-130	1.04909e-127
SFTA1P	-4.59843	9.95775	6.3391e-130	1.93386e-127
AL109741.3	-3.49861	3.59857	4.1289e-124	1.21761e-121
AC112722.1	-3.23014	4.27206	9.12173e-120	2.60323e-117
AC104211.2	-4.20676	3.21958	2.57043e-119	7.10643e-117
AC105206.1	-4.49057	3.45055	7.94771e-119	2.13071e-116
GATA6-AS1	-3.30214	5.82578	4.21854e-118	1.09769e-115
AC026369.3	-4.29615	6.36371	6.56267e-118	1.65885e-115
AL355388.1	-4.33117	3.96055	8.85835e-116	2.17694e-113
AL109741.1	-3.17004	4.89181	3.5599e-114	8.51201e-112
AC079630.1	-3.8757	8.77713	7.94478e-112	1.84967e-109
SMIM25	-3.05655	10.3439	1.05832e-111	2.40075e-109
PCAT19	-3.00351	9.29485	7.83579e-111	1.73308e-108
AC236972.3	-5.34375	5.35218	2.2535e-110	4.86261e-108
KCNMB2-AS1	7.39253	9.98365	4.87731e-109	1.02737e-106
AC006273.1	-3.04215	4.49639	9.0094e-109	1.85363e-106
ACOXL-AS1	-2.74836	4.95337	5.85422e-108	1.1771e-105
AP001189.3	-3.28844	6.20314	1.39967e-107	2.75175e-105
LINC01645	-4.00286	3.54433	1.90134e-107	3.65678e-105
AL049555.1	6.55765	11.464	1.9432e-107	3.65776e-105
LINC00607	-3.08015	6.2754	2.68483e-107	4.94848e-105
AC026992.2	-3.81109	5.79442	9.20474e-107	1.66192e-104
LINC01936	-3.5028	8.18541	6.87336e-105	1.20461e-102
LINC00891	-3.49545	4.64784	6.94418e-105	1.20461e-102
LHFPL3-AS2	-4.31048	8.63302	3.8815e-103	6.60378e-101
LDLRAD4-AS1	-3.83794	3.20009	4.40705e-103	7.35645e-101
AC011899.2	-3.06784	8.16871	1.2674e-100	2.07642e-98
AC083837.1	-3.37032	6.93351	5.16495e-99	8.30805e-97
MIR497HG	-2.16342	6.43947	6.08097e-99	9.60684e-97
LINC01290	-2.46237	4.82344	1.11927e-97	1.73722e-95
LINC01572	3.20743	6.9644	1.55606e-97	2.37352e-95
PACRG-AS3	-4.54893	3.55507	1.38393e-96	2.07519e-94
AL162511.1	-4.35723	6.35117	1.40923e-95	2.07791e-93
AC008268.1	-6.43562	7.93054	3.61629e-95	5.2448e-93
LINC00702	-3.15088	7.38418	8.16284e-95	1.16478e-92
AC093278.2	-2.48905	8.18302	5.53673e-94	7.77516e-92
AC119424.1	-4.22244	3.38902	2.34125e-93	3.23642e-91
AC010976.2	-3.64749	5.18537	3.29173e-93	4.4803e-91
AL135960.1	-3.36645	4.63462	5.6691e-93	7.59916e-91
AC079160.1	7.75979	7.34801	2.1549e-91	2.84543e-89
BBOX1-AS1	6.77881	9.46712	2.31706e-91	3.01456e-89
AC025271.4	-3.63278	4.14733	6.84424e-91	8.77551e-89
AC007128.1	6.37295	7.1724	3.54507e-90	4.48046e-88
AC003991.1	-3.6477	5.03055	7.43567e-90	9.26527e-88
AC147067.2	-3.01288	4.34127	6.27681e-89	7.60698e-87
AL049544.1	-4.35877	3.22745	1.0581e-88	1.265e-86
RBPMS-AS1	-2.86536	7.22042	2.20453e-86	2.60047e-84
MED4-AS1	-2.40439	4.33473	6.93603e-86	8.07408e-84
LINC01197	-2.73305	6.19028	1.1421e-85	1.31223e-83
AL445493.3	-3.74125	3.53213	1.41141e-85	1.60087e-83
CASC9	7.48312	10.4594	6.5031e-85	7.28264e-83
AL445423.1	-3.03848	3.8896	8.93337e-84	9.87919e-82
PGM5-AS1	-3.96395	3.26753	4.82625e-83	5.27134e-81
AC008669.1	-2.18943	6.94266	3.6035e-82	3.88782e-80
LINC01996	-4.98196	5.56427	7.6733e-82	8.17899e-80
AP002856.2	-5.73428	5.15073	2.62038e-81	2.75982e-79
TBX5-AS1	-2.72061	9.10582	7.09363e-81	7.38322e-79
AC127521.1	-2.81847	5.491	1.17679e-80	1.21059e-78
AC015914.1	-2.9117	4.21017	2.46608e-80	2.50775e-78
AC007128.2	7.12853	5.7486	3.31399e-80	3.33169e-78
AC023509.2	-2.96562	3.69853	3.45664e-80	3.43606e-78
AC004947.1	-4.11303	5.36861	1.31586e-79	1.29349e-77
AL136369.1	-5.07402	3.34303	1.01063e-78	9.82529e-77
AP001528.2	-2.6061	5.35949	5.37511e-78	5.16887e-76
LINC01352	-2.87896	4.60685	7.16324e-78	6.81432e-76
AC133785.1	7.42447	6.96619	1.89912e-77	1.78739e-75
AC091588.3	-3.04573	4.19481	2.31492e-77	2.1558e-75
AC018529.1	-2.88895	3.54	2.86573e-77	2.64095e-75
AC022031.2	7.5261	7.59961	3.6288e-77	3.30969e-75
LINC00511	4.00764	12.1727	4.96479e-77	4.48199e-75
AC009806.1	-2.78861	3.71301	7.29632e-77	6.52026e-75
C5orf64	-2.92795	3.24787	1.57455e-76	1.37921e-74
LINC00656	-3.4581	4.41256	2.82173e-76	2.44744e-74
AC010776.3	-4.44804	2.60065	2.93187e-76	2.51828e-74
AC019193.2	-2.85026	3.56908	5.89637e-76	5.01588e-74
AL354714.3	-4.17672	3.61695	1.15775e-75	9.75488e-74
AC013553.3	-2.54087	4.56087	1.18498e-74	9.89012e-73
MIR22HG	-2.00329	11.2575	1.34793e-74	1.1145e-72
AC095050.1	-4.90062	3.76821	1.54289e-74	1.26388e-72
AC027288.1	-3.98453	5.28721	1.88539e-74	1.53028e-72
AC010998.1	-3.93107	3.87501	4.1041e-74	3.30081e-72
AC024257.1	-3.66024	3.01033	4.38971e-73	3.49872e-71
LINC01863	-4.70967	3.9174	4.50867e-73	3.56145e-71
VIPR1-AS1	-2.52409	6.013	8.58421e-73	6.72076e-71
AP000438.1	-3.25716	3.67785	9.09162e-73	7.05558e-71
AC105053.1	-3.71675	3.58696	1.19503e-72	9.19341e-71
LINC01748	5.67306	8.16052	2.39184e-72	1.82419e-70
AL035409.1	-2.69295	4.45079	2.52968e-72	1.91283e-70
LINC02555	-3.98051	6.94961	2.2875e-71	1.71504e-69
PGM5P4-AS1	-3.42567	3.39661	5.55005e-71	4.12616e-69
MAGI2-AS3	-2.29697	10.2426	2.17635e-70	1.60451e-68
LINC02163	7.38423	5.97445	4.42563e-70	3.23583e-68
AC026992.1	-3.13452	3.65286	4.69613e-70	3.40547e-68
AP001972.1	-3.20928	3.25653	6.28823e-70	4.52292e-68
AC104984.1	-3.598	3.4005	8.77986e-70	6.26415e-68
AC099850.3	3.07519	8.57122	9.33578e-70	6.60749e-68
MIR205HG	6.08637	13.441	1.49299e-69	1.04829e-67
AC105914.2	-4.63662	2.9381	2.25077e-69	1.56792e-67
AC091948.1	-2.08572	4.86934	4.64498e-69	3.21048e-67
AC106900.2	5.61708	5.78413	7.63229e-69	5.23433e-67
APOA1-AS	-2.03528	3.74461	8.50245e-69	5.78625e-67
TFAP2A-AS1	3.28823	6.82043	8.87618e-69	5.99447e-67
AC005180.2	-2.61501	3.99301	1.16575e-68	7.81319e-67
AL117329.1	8.03017	6.94273	2.99643e-68	1.99319e-66
AL731557.1	-3.08501	3.2831	7.1394e-68	4.7136e-66
AL445470.1	-3.31302	3.17687	1.73855e-67	1.13933e-65
LINC01633	6.88833	5.08385	2.93381e-67	1.90848e-65
AC005180.1	-2.85895	3.56915	5.15548e-67	3.32924e-65
AL390036.1	-2.87657	4.10725	1.1313e-66	7.2526e-65
CARMN	-2.05643	7.03463	2.22919e-66	1.41882e-64
MIR4713HG	5.44959	5.75228	3.82042e-66	2.41423e-64
POU6F2-AS2	7.28382	6.54464	6.00572e-66	3.76827e-64
LINC01980	8.85748	9.0342	6.36426e-66	3.96511e-64
AC005740.4	-2.10974	4.34302	6.70017e-66	4.1452e-64
ADAMTSL4-AS1	-2.09366	5.74114	8.25966e-66	5.07453e-64
AC116049.2	7.25596	5.56806	2.31558e-65	1.40315e-63
LINC00491	7.2541	7.61387	3.44033e-65	2.07052e-63
AC004982.1	-2.29934	5.50489	1.0556e-64	6.26771e-63
AC243960.3	-2.56557	5.00286	1.70566e-64	1.006e-62
AL133215.2	3.0532	6.29627	2.01125e-64	1.17838e-62
LINC01836	-2.68236	6.37422	8.05686e-64	4.68941e-62
TMPO-AS1	2.39036	8.96282	8.14826e-64	4.71161e-62
MAMDC2-AS1	-2.04292	5.66846	8.41281e-64	4.833e-62
AL033519.3	-3.6217	5.02194	8.83722e-64	5.04406e-62
AC013457.1	-4.91111	7.15909	1.25774e-63	7.13281e-62
LINC02428	7.00966	6.66573	2.02044e-63	1.13852e-61
AC005537.1	5.11152	7.75079	2.3172e-63	1.29749e-61
STARD13-AS	-2.8774	4.05941	2.33231e-63	1.29773e-61
AP002761.3	-2.24195	5.41124	3.32884e-63	1.82921e-61
AC093895.1	5.3035	8.04866	4.02411e-63	2.19761e-61
AC090559.1	-2.38972	7.59067	4.53497e-63	2.44831e-61
AC002398.2	-3.38117	2.87282	4.53853e-63	2.44831e-61
AC025280.1	-3.30578	2.75815	7.49355e-63	4.0179e-61
AC096564.1	-2.47907	3.60768	8.0975e-63	4.31558e-61
AC084398.2	-3.3248	3.41073	1.07938e-62	5.71811e-61
AC010168.1	4.80232	7.12198	1.21468e-62	6.39659e-61
AP005230.1	5.90746	7.45674	1.48031e-62	7.7493e-61
AL139041.1	-2.32114	4.36934	1.57216e-62	8.18172e-61
CALML3-AS1	6.053	9.30865	2.39894e-62	1.24113e-60
AC020891.2	6.5147	5.40763	3.06196e-62	1.57495e-60
BCRP3	-2.39078	6.43632	3.83832e-62	1.95159e-60
LINC02038	-3.15558	5.73389	5.07053e-62	2.56337e-60
ZEB2-AS1	-2.11303	4.77934	1.30526e-61	6.56115e-60
AC013652.1	3.69715	8.25951	2.82245e-61	1.41075e-59
AC010595.1	7.65961	5.95749	5.73246e-61	2.84916e-59
AC096531.2	-4.03132	5.88581	6.78711e-61	3.3545e-59
AP000821.1	-3.89475	2.63809	1.49259e-60	7.3361e-59
AC007405.1	-2.81199	5.95116	1.65308e-60	8.07998e-59
AL357054.4	-2.40522	6.93382	2.79463e-60	1.35104e-58
LINC00163	-3.75888	4.26754	3.46398e-60	1.66554e-58
PCAT6	3.05952	9.37465	6.90622e-60	3.30267e-58
AC002066.1	-2.77685	5.10765	7.15491e-60	3.4032e-58
DDX11-AS1	2.86859	7.0901	8.30763e-60	3.90945e-58
LINC02489	-3.88018	5.13813	9.41839e-60	4.4087e-58
AL135999.3	-4.0711	5.82836	1.01242e-59	4.71414e-58
AL512363.1	6.92427	7.50918	1.08073e-59	5.00588e-58
AC093772.1	-3.35953	3.92528	1.25215e-59	5.76968e-58
AC027277.2	-2.84896	4.17938	1.37018e-59	6.28081e-58
AC079467.1	-4.21703	6.36643	2.34124e-59	1.06768e-57
AP003548.1	-3.19369	2.86917	2.82858e-59	1.28331e-57
CADM3-AS1	-3.30748	5.73288	6.39031e-59	2.88444e-57
AP003390.1	4.54252	7.2811	6.94375e-59	3.11834e-57
AC011899.3	-2.72968	4.36512	7.34276e-59	3.28088e-57
BX248123.1	-2.74931	2.77672	1.34155e-58	5.96417e-57
LINC00844	-3.80617	2.87978	1.44625e-58	6.39748e-57
MELTF-AS1	2.93682	9.13119	3.26163e-58	1.4356e-56
FOXD3-AS1	7.22585	7.42944	4.17309e-58	1.82769e-56
G2E3-AS1	8.26658	7.47137	4.30993e-58	1.87832e-56
VPS9D1-AS1	3.66126	10.2311	8.55938e-58	3.712e-56
AC092652.2	-3.1386	2.69508	8.69487e-58	3.75236e-56
AC092384.1	-2.4272	3.45697	1.13233e-57	4.86299e-56
LINC01985	-3.41388	2.84216	4.71625e-57	2.006e-55
LINC02185	-3.23268	5.57165	7.14503e-57	3.0101e-55
AL031058.1	3.19167	8.52006	9.67545e-57	4.05681e-55
AP000251.1	4.65213	6.26724	1.22218e-56	5.10029e-55
AC010275.1	6.56701	7.14936	1.52954e-56	6.35296e-55
AL355304.1	-2.34895	4.06988	2.55397e-56	1.05584e-54
AC093510.2	-2.50051	3.56836	3.50086e-56	1.44056e-54
DLX6-AS1	6.96478	9.56302	8.62271e-56	3.49932e-54
SFTPD-AS1	-2.70122	3.74018	1.97557e-55	7.9445e-54
HHIP-AS1	-2.74358	7.84444	2.92831e-55	1.17225e-53
AC005736.1	-2.60609	5.76789	3.59125e-55	1.42474e-53
AC108134.3	-2.17821	6.71485	4.93221e-55	1.948e-53
AC024337.2	-2.3087	4.77067	9.49303e-55	3.71614e-53
LINC01412	-2.88587	2.91505	1.02876e-54	4.00943e-53
AF127577.3	7.72818	6.15675	1.40561e-54	5.45413e-53
AC037198.2	-2.7534	4.40387	1.46789e-54	5.67094e-53
AC106028.4	-2.36409	4.07135	1.48828e-54	5.7247e-53
AP001189.5	-2.84219	2.78286	2.47555e-54	9.48104e-53
LINC00315	-2.0643	3.82467	8.82426e-54	3.36501e-52
AL049871.1	-2.33656	3.54271	1.41201e-53	5.3614e-52
AC091057.1	2.10787	9.77842	1.69519e-53	6.40911e-52
HLX-AS1	-2.7758	3.27121	3.4961e-53	1.31617e-51
AC007998.3	-2.19445	5.79826	4.19695e-53	1.57332e-51
AC090796.1	-3.8645	4.00265	7.92939e-53	2.95997e-51
AC068831.6	4.86755	5.42032	1.36392e-52	5.06999e-51
AC007671.1	-2.5851	4.10789	1.38862e-52	5.14023e-51
AC093567.1	-2.46157	3.60117	1.9937e-52	7.31879e-51
AC111152.2	-2.08427	3.6788	2.81751e-52	1.02578e-50
AC092071.1	-3.81153	5.22705	7.80021e-52	2.82822e-50
LINC00982	-2.6984	6.68328	7.90534e-52	2.85464e-50
LINC00472	-2.2678	6.25633	1.05809e-51	3.80527e-50
AL354714.1	-3.39549	5.23575	2.10323e-51	7.53329e-50
AC135178.1	-2.9851	2.8731	2.1801e-51	7.77714e-50
Z83851.1	2.54146	8.47306	2.85104e-51	1.01298e-49
AL157895.1	-2.48328	5.84658	3.507e-51	1.24106e-49
AC006206.2	4.70857	8.44993	3.70575e-51	1.30617e-49
AL161740.1	-4.3753	2.56188	5.3946e-51	1.89389e-49
AP001094.2	-2.22313	5.00893	1.32537e-50	4.6346e-49
AL354993.2	3.66435	5.52009	1.88263e-50	6.55733e-49
AC026401.3	2.31383	10.5966	2.0609e-50	7.15012e-49
AC105384.1	-2.62481	3.8356	2.11208e-50	7.29906e-49
AC006159.1	-3.03016	2.96054	3.08073e-50	1.05641e-48
LINC02033	-2.10863	3.71161	3.90441e-50	1.33368e-48
SLC2A1-AS1	3.31729	7.90379	4.75167e-50	1.61685e-48
AC016205.1	4.71405	7.84348	5.15257e-50	1.74654e-48
HOXC13-AS	7.98122	7.45321	7.11927e-50	2.40398e-48
LINC00670	-3.54086	2.95978	7.47931e-50	2.51595e-48
AC092691.1	-4.09953	4.03616	1.48445e-49	4.95581e-48
AC009264.1	7.76439	8.10166	2.4935e-49	8.26217e-48
AC006238.1	-2.21936	4.00876	2.81349e-49	9.28765e-48
AC104836.1	-2.01798	3.92799	2.93341e-49	9.64755e-48
AC024909.2	-2.32959	5.8913	7.25759e-49	2.37807e-47
AC022164.1	-2.55747	5.17199	7.81484e-49	2.55122e-47
LINC01105	-3.89527	4.78389	8.39872e-49	2.73175e-47
SLC14A2-AS1	-2.83238	2.91955	8.68958e-49	2.816e-47
AC005358.2	-2.85996	2.81741	9.2495e-49	2.98651e-47
OGFRP1	2.5649	7.36168	1.08644e-48	3.49518e-47
AC104237.3	-2.85369	3.75217	1.22446e-48	3.91941e-47
AC131532.1	6.51646	7.03165	1.22717e-48	3.91941e-47
AC106799.2	7.53626	6.24324	1.65911e-48	5.27991e-47
AC079210.1	-2.53689	4.20509	2.21701e-48	7.03006e-47
AL513123.1	7.3332	5.49435	2.29738e-48	7.25889e-47
AC130456.2	-3.23297	5.76287	2.33559e-48	7.35335e-47
LINC00671	-2.42719	3.43353	2.44866e-48	7.68203e-47
AC027228.2	3.2626	7.02898	3.22242e-48	1.00738e-46
AC011444.3	-2.55623	2.66444	3.84822e-48	1.19877e-46
LINC00519	5.96065	9.0834	3.96375e-48	1.23043e-46
AC011632.1	7.77909	8.90291	4.39937e-48	1.36088e-46
AL445426.1	-2.36028	3.58404	4.61384e-48	1.42225e-46
AC226101.1	-3.04844	2.65868	4.71069e-48	1.44707e-46
AC091806.1	-2.59317	4.14629	5.59129e-48	1.71163e-46
MEF2C-AS1	-2.30587	5.11889	8.22262e-48	2.49985e-46
LINC00924	-2.46724	5.61545	1.71094e-47	5.1838e-46
SNHG4	2.55507	8.82907	1.82075e-47	5.49766e-46
PVT1	2.38157	10.843	2.10352e-47	6.32988e-46
AC005277.2	-2.54241	2.80535	2.27728e-47	6.82951e-46
AC104237.2	-3.01119	3.41093	4.494e-47	1.33867e-45
FP325330.3	6.58451	5.18203	1.2492e-46	3.69621e-45
AC020907.1	6.46208	7.72874	2.10444e-46	6.206e-45
AC011944.1	-2.6801	5.9058	3.16599e-46	9.30548e-45
AC069277.1	5.32214	6.39452	3.64636e-46	1.06819e-44
AC022075.1	4.08831	10.2891	3.65931e-46	1.06845e-44
LINC00958	5.72144	11.117	6.42957e-46	1.87113e-44
AC123595.1	-2.24151	4.80255	1.05745e-45	3.06729e-44
DARS-AS1	2.14635	8.21486	1.58816e-45	4.59165e-44
AL355338.1	2.29076	9.92095	2.83452e-45	8.16841e-44
AC012409.3	-2.45751	3.53239	2.84399e-45	8.1691e-44
AC009262.1	5.44185	4.01837	4.44174e-45	1.27172e-43
AC129507.2	-2.97798	4.39677	4.74797e-45	1.35501e-43
HAGLROS	4.47142	8.18378	7.76433e-45	2.20163e-43
AC004921.1	-2.055	5.38785	1.2903e-44	3.6448e-43
NPSR1-AS1	6.52599	5.76167	1.29362e-44	3.6448e-43
AC023449.2	-2.32089	6.28524	1.40313e-44	3.9408e-43
LINC01108	-3.24528	5.42395	1.49363e-44	4.1777e-43
AC024581.1	5.01567	4.88998	1.49693e-44	4.1777e-43
AC018755.4	-2.36962	5.79133	1.70391e-44	4.74039e-43
AC092809.2	-2.77629	4.31306	2.01964e-44	5.60117e-43
AL583808.1	5.64834	6.65606	3.1151e-44	8.58544e-43
AC004540.1	-2.02923	6.60752	3.70929e-44	1.01598e-42
LINC01096	6.17498	5.73911	4.32722e-44	1.17794e-42
PCAT7	3.93561	7.50286	5.90063e-44	1.59642e-42
CASC8	4.66025	8.01474	1.31944e-43	3.54805e-42
MIR2052HG	4.82427	6.24805	1.65293e-43	4.43135e-42
AL365361.1	-2.36473	9.11965	1.92691e-43	5.15027e-42
AC124319.3	-2.02824	3.61208	2.08141e-43	5.54647e-42
HOXC-AS2	5.63808	6.70726	3.24932e-43	8.63264e-42
DSG1-AS1	6.83017	6.79114	4.50804e-43	1.19053e-41
PARAL1	-3.56754	6.79506	5.35053e-43	1.40881e-41
LINC01165	-2.74609	3.20787	8.61648e-43	2.26202e-41
AL031599.1	-2.61502	3.16432	8.7598e-43	2.29284e-41
LINC02104	-2.50381	3.91294	1.00125e-42	2.613e-41
MIR29B2CHG	-2.09523	8.59289	1.30669e-42	3.40008e-41
AC022217.2	-2.54133	2.82472	1.47936e-42	3.826e-41
Z82246.1	-3.48122	3.02621	1.48335e-42	3.826e-41
LINC02471	-3.51945	6.12813	1.87936e-42	4.83333e-41
AC084880.3	-3.2616	3.29068	2.16192e-42	5.5279e-41
LINC02147	-2.73076	3.2269	2.34737e-42	5.98477e-41
AC105339.2	2.28588	6.489	2.47917e-42	6.30266e-41
LINC00668	7.06001	9.95818	3.11212e-42	7.8891e-41
AC010776.2	-3.92611	4.35222	3.83798e-42	9.70133e-41
LINC00551	-2.72446	5.3885	5.15353e-42	1.29895e-40
AP003119.2	3.15042	6.25822	6.26726e-42	1.57518e-40
AC015908.3	-2.0013	4.25228	8.10438e-42	2.03115e-40
LINC00898	7.32309	6.58188	9.15247e-42	2.28734e-40
AC023906.2	6.74705	5.39271	9.46947e-42	2.35327e-40
AL136162.1	2.56488	6.39391	1.04345e-41	2.58583e-40
AC068700.1	-2.27759	5.4588	1.09108e-41	2.6963e-40
AC083973.1	4.3793	6.50545	1.34456e-41	3.30426e-40
AC104041.1	4.24748	6.40628	1.42557e-41	3.49364e-40
AC099487.1	5.49011	4.46667	2.0631e-41	5.02816e-40
AC105389.2	-2.52257	3.44291	2.31473e-41	5.5952e-40
AC110048.2	-2.0714	3.83865	3.06661e-41	7.35238e-40
TMEM108-AS1	-3.09876	2.58163	3.17892e-41	7.60106e-40
MYO16-AS1	-3.13881	5.65852	3.22792e-41	7.68609e-40
LINC01703	2.97173	7.1106	3.23186e-41	7.68609e-40
AL445430.2	-3.3549	2.61803	3.32468e-41	7.88564e-40
LINC01967	6.19009	5.23194	3.77813e-41	8.93719e-40
AP001453.2	3.62294	7.87138	3.80734e-41	8.98227e-40
LINC02289	-2.30855	5.70921	3.91005e-41	9.20005e-40
AL031665.1	-2.01672	3.00216	4.05433e-41	9.51424e-40
AC013731.1	2.44776	5.46915	6.74205e-41	1.57796e-39
AC128689.1	5.58805	7.12437	1.1311e-40	2.63337e-39
AL391152.1	3.673	5.54356	1.31537e-40	3.05436e-39
AC092802.1	-2.02987	4.7275	1.68527e-40	3.90304e-39
AC006305.1	4.88089	8.13856	2.09668e-40	4.84317e-39
AC116366.2	-2.15001	3.53882	2.12102e-40	4.88664e-39
AL512328.1	-2.34638	3.56535	2.14246e-40	4.9232e-39
AL034399.2	5.15358	5.63583	2.2492e-40	5.1551e-39
AC130456.1	-2.89472	2.97822	2.39676e-40	5.4791e-39
AC009123.1	4.37384	6.37189	2.80667e-40	6.39964e-39
AC011287.1	6.96277	7.00028	3.38763e-40	7.6847e-39
AC109361.2	-2.38302	3.88497	4.20951e-40	9.52469e-39
AC114956.2	4.22604	7.14117	5.93918e-40	1.34041e-38
AC078778.1	2.40667	6.14907	6.21469e-40	1.39902e-38
AC009974.1	-2.21273	4.1281	7.89467e-40	1.77269e-38
ELN-AS1	-2.76306	6.31578	9.28162e-40	2.0736e-38
AC106799.1	6.14204	4.82394	9.98181e-40	2.22441e-38
LINC02126	-2.52352	4.30312	1.444e-39	3.19376e-38
AL138902.1	3.93231	4.78076	1.4595e-39	3.21999e-38
LINC00940	-3.07016	2.93452	1.54754e-39	3.40574e-38
AC006042.4	-2.06525	3.67999	1.98509e-39	4.35783e-38
AC011374.1	5.38706	8.67885	2.09114e-39	4.57929e-38
AC114489.1	5.91792	5.44025	2.54385e-39	5.5569e-38
AC097358.2	3.56813	3.97155	2.9852e-39	6.50493e-38
AL021578.1	-2.04594	5.41041	3.74266e-39	8.13546e-38
AC021504.1	4.94644	8.81038	3.75352e-39	8.13906e-38
AP003064.2	-2.89416	4.15653	4.8073e-39	1.03986e-37
LINC02562	3.42833	9.53182	5.807e-39	1.25304e-37
TARID	-2.68461	6.51774	6.81898e-39	1.46782e-37
FIRRE	3.74673	8.01142	7.79336e-39	1.67349e-37
AL162408.1	-3.35116	2.51377	1.06024e-38	2.27117e-37
AL359513.1	2.66747	6.82225	1.10179e-38	2.35449e-37
AC036176.3	5.91749	4.64926	1.3137e-38	2.79382e-37
AL034397.3	-2.31289	7.56082	1.33952e-38	2.84191e-37
AC114291.1	-3.91816	4.16076	1.66422e-38	3.52232e-37
Z83851.2	2.42106	7.08255	1.97881e-38	4.17817e-37
HOXA11-AS	5.82913	7.00407	3.87871e-38	8.1315e-37
AC084864.1	3.96149	4.51525	4.40211e-38	9.18524e-37
FEZF1-AS1	5.85974	9.54065	4.61837e-38	9.61382e-37
AC004540.2	-2.51706	5.94765	6.05153e-38	1.25381e-36
AL033397.2	4.39841	6.95052	6.3121e-38	1.30475e-36
AC012511.1	-2.17413	4.14795	6.54052e-38	1.34881e-36
AC104088.1	4.75381	5.55963	7.59248e-38	1.56211e-36
AC009121.1	3.13487	5.10683	7.66102e-38	1.57255e-36
AC025575.2	6.37495	8.16897	8.87354e-38	1.81303e-36
AC002451.1	-2.64525	3.59397	1.06324e-37	2.15746e-36
AL118505.1	3.0749	7.52686	1.30649e-37	2.64496e-36
LINC01807	7.20137	6.74883	1.43234e-37	2.89313e-36
TRPM2-AS	4.63066	8.20989	1.53098e-37	3.08532e-36
AC129507.3	-2.73143	3.91954	1.57154e-37	3.15986e-36
LINC01873	4.87246	4.71735	1.58369e-37	3.16989e-36
AC016910.1	-2.14336	2.66471	1.90568e-37	3.80578e-36
KDM4A-AS1	2.66656	8.21605	2.32778e-37	4.63826e-36
AC134312.1	-2.52864	4.32651	2.65166e-37	5.27175e-36
AL109659.2	-2.10884	4.24893	2.67268e-37	5.30162e-36
AC025166.1	3.84098	3.80194	3.12673e-37	6.17459e-36
LINC01031	-2.37445	3.33551	4.02e-37	7.90332e-36
AC080037.1	4.70086	6.73358	4.23397e-37	8.30552e-36
AC022639.1	7.1268	5.93223	6.85055e-37	1.3379e-35
LINC02466	6.28236	5.27192	7.55704e-37	1.46939e-35
CYP4A22-AS1	2.91691	5.58935	9.51509e-37	1.84605e-35
AP003469.2	2.93877	5.81275	9.58828e-37	1.85618e-35
AC106028.2	-2.00566	3.83547	1.0014e-36	1.93437e-35
AC005993.1	5.21368	6.09009	1.3815e-36	2.65121e-35
AC105219.4	2.45375	6.55797	1.45579e-36	2.78775e-35
AL132857.1	-3.67993	3.72559	1.53681e-36	2.93653e-35
LINC01305	6.6351	6.72484	1.70151e-36	3.24425e-35
AC046195.1	-3.40883	6.3655	1.89051e-36	3.59686e-35
AC022031.1	5.73453	3.94312	1.90528e-36	3.61717e-35
AC026250.1	2.68026	7.02302	2.52372e-36	4.76062e-35
AC009271.1	4.8911	7.14455	2.66772e-36	5.02155e-35
AC012213.4	6.2221	5.26821	2.80671e-36	5.27197e-35
AP002954.1	-2.31308	5.03087	2.89253e-36	5.42166e-35
DUXAP8	3.36629	9.49382	3.00999e-36	5.61801e-35
AC010148.1	2.9918	6.3938	3.27633e-36	6.10226e-35
AL133304.2	-4.041	3.4226	3.74898e-36	6.95329e-35
PTCSC3	-2.64648	4.51266	3.77342e-36	6.98398e-35
LINC00261	-3.46309	9.06673	4.24581e-36	7.8419e-35
LINC02435	-2.49281	2.61638	4.99371e-36	9.20404e-35
AC234772.2	3.31809	5.62306	6.50943e-36	1.19232e-34
AL023803.2	2.65772	5.61822	6.93536e-36	1.26622e-34
AC245884.11	-2.23174	3.56922	1.00847e-35	1.83201e-34
LMO7DN-IT1	-2.42527	3.17526	1.04787e-35	1.89969e-34
AL078645.1	-2.23493	2.90929	1.09952e-35	1.98926e-34
SOX21-AS1	4.07258	10.038	1.32225e-35	2.38734e-34
AGAP1-IT1	-2.02709	4.82797	1.34796e-35	2.4288e-34
AL033384.1	4.81531	8.63314	1.35917e-35	2.44401e-34
AC010491.1	2.3166	6.05356	1.48437e-35	2.66373e-34
LINC02156	3.51087	3.83157	1.57361e-35	2.81817e-34
AC017083.1	2.43548	5.62616	1.65511e-35	2.95812e-34
AL365356.5	6.27706	6.8555	1.89587e-35	3.36128e-34
LINC01977	3.79259	5.87548	2.49964e-35	4.42286e-34
LINC00211	-2.70775	3.52017	2.53073e-35	4.46894e-34
AL591178.1	-3.28075	3.82304	2.67047e-35	4.7063e-34
FRMD6-AS1	2.31974	6.68644	3.25497e-35	5.72499e-34
LINC01234	7.1232	9.37899	5.92502e-35	1.03799e-33
AC012213.1	5.72854	5.83282	6.30309e-35	1.10204e-33
AL590226.2	4.16585	8.84691	6.54596e-35	1.14225e-33
C8orf34-AS1	-3.00712	8.52744	6.59901e-35	1.14924e-33
AC040174.1	5.80761	5.89813	8.78104e-35	1.52624e-33
AC010175.1	-2.05617	3.32208	1.2449e-34	2.1553e-33
SMAD9-IT1	-2.15769	3.15077	1.6375e-34	2.82949e-33
AC091057.4	2.36361	5.43949	1.6802e-34	2.89761e-33
AC106799.3	6.44004	6.14245	2.9145e-34	4.97772e-33
AC105137.2	2.09758	4.89394	3.4553e-34	5.85615e-33
AC078942.1	-2.77035	2.96055	3.47659e-34	5.86973e-33
AC007743.1	-2.22375	7.55802	3.65825e-34	6.16468e-33
LINC01150	-2.0396	4.43858	3.96785e-34	6.67368e-33
HOXA10-AS	5.49238	5.75436	4.03226e-34	6.76914e-33
LINC01698	6.74973	4.7737	4.18629e-34	7.01441e-33
AP003680.1	3.00143	4.6322	4.34703e-34	7.26998e-33
AC025183.1	7.88052	5.79681	4.38242e-34	7.31533e-33
LINC01624	-2.36788	4.04652	4.73911e-34	7.89583e-33
AL122125.1	2.66528	5.41932	5.1719e-34	8.60072e-33
AP001189.6	-2.30515	2.7136	5.5902e-34	9.2789e-33
AC100803.3	-2.01401	6.1612	5.91349e-34	9.79712e-33
AC027449.1	-2.19209	3.07888	6.42658e-34	1.06273e-32
AL161785.1	-2.078	6.70799	6.46641e-34	1.06732e-32
AL139385.1	2.87881	7.4757	6.87288e-34	1.1323e-32
AC002076.1	3.55462	4.56496	7.00672e-34	1.1522e-32
AC073195.1	2.00587	6.21232	7.85255e-34	1.2889e-32
C5orf66-AS1	7.7533	7.49614	8.12855e-34	1.33173e-32
AC124312.2	-2.09461	3.8404	1.02848e-33	1.67878e-32
LINC01981	5.20349	3.81961	1.13498e-33	1.8492e-32
AC012640.2	2.2451	8.29191	1.34759e-33	2.19157e-32
AC073529.1	2.05653	6.0238	1.60803e-33	2.61032e-32
DEPDC1-AS1	3.52744	4.01032	1.79265e-33	2.90468e-32
AC245128.3	-2.21397	5.91855	2.22009e-33	3.58414e-32
AL445531.1	4.72759	4.5099	2.33997e-33	3.77081e-32
LINC02265	-2.47374	4.17672	2.62638e-33	4.22466e-32
AC103949.1	-2.48009	3.3967	2.91424e-33	4.67917e-32
MIR2117HG	5.47188	6.09053	2.94965e-33	4.72746e-32
AC010280.1	7.00947	6.46584	2.96304e-33	4.74033e-32
AL590617.2	2.09962	8.85101	3.35424e-33	5.34684e-32
LINC00640	3.54188	7.11808	3.37086e-33	5.36367e-32
AP003774.3	-2.05166	3.14374	3.52783e-33	5.60099e-32
AC083949.1	-2.01576	5.08776	3.86116e-33	6.11085e-32
AL358334.2	4.66673	6.74783	3.89587e-33	6.15478e-32
PGM5P3-AS1	-3.06113	3.64119	4.38344e-33	6.91271e-32
LINC01331	-3.22145	2.62558	4.70175e-33	7.40149e-32
FAM83A-AS1	6.36586	8.38291	5.00859e-33	7.87051e-32
FO393415.1	-2.48397	4.04731	5.31047e-33	8.3301e-32
ZFPM2-AS1	5.15474	8.90813	5.66776e-33	8.87481e-32
AC114812.2	5.57154	5.17831	6.1129e-33	9.55492e-32
AC025259.3	-2.17362	5.99694	7.12962e-33	1.11245e-31
AC138305.1	5.50805	5.99581	8.74636e-33	1.35753e-31
AL139023.1	7.15314	5.50061	1.14028e-32	1.76674e-31
AC008406.3	5.52171	5.21376	1.15512e-32	1.78659e-31
AC020891.3	4.25691	3.18009	1.32275e-32	2.03873e-31
GHET1	2.04641	6.6513	1.45379e-32	2.23682e-31
RUNDC3A-AS1	3.25576	7.30977	1.48389e-32	2.27916e-31
AL359815.1	-2.58866	2.5273	1.62113e-32	2.48564e-31
AL683887.1	6.13872	4.7016	1.66e-32	2.54084e-31
LINC02253	6.4874	7.78107	1.75254e-32	2.67785e-31
RMST	-3.47776	4.57728	1.86365e-32	2.84271e-31
AL121832.3	2.05079	6.56081	1.87818e-32	2.85994e-31
LINC02356	-2.02248	3.71506	2.36371e-32	3.58692e-31
Z93403.1	3.97295	5.4134	2.66787e-32	4.03465e-31
AC010329.1	-2.89665	7.34519	4.18215e-32	6.30315e-31
AC114803.1	5.33688	3.87845	4.26687e-32	6.4199e-31
LINC00887	4.0034	6.24942	4.98223e-32	7.45817e-31
AC023034.1	3.25821	4.39931	5.10269e-32	7.6256e-31
AC013264.1	-2.8473	6.08998	5.91527e-32	8.82503e-31
LINC01752	4.23873	7.00014	7.37212e-32	1.098e-30
AC007848.1	4.00771	6.11299	9.67833e-32	1.43665e-30
AC130456.3	-2.34506	4.08517	1.26239e-31	1.86762e-30
AC011005.4	3.1472	5.13569	1.30942e-31	1.93397e-30
AC009118.2	3.16812	5.28135	1.34146e-31	1.97799e-30
AC009097.2	3.19454	4.06179	1.68093e-31	2.4703e-30
AC106798.1	4.68053	5.882	2.14743e-31	3.14022e-30
AC005901.1	-2.40246	2.63454	2.5939e-31	3.78683e-30
AC114956.1	3.28357	6.14892	2.71894e-31	3.96285e-30
AL592114.3	-2.7863	2.88137	3.84866e-31	5.56358e-30
AC083801.2	6.45825	6.24899	4.28378e-31	6.17241e-30
AC004816.1	2.41575	8.27438	5.40167e-31	7.75789e-30
NAV2-AS2	-2.5977	4.12057	5.45063e-31	7.81552e-30
LINC02541	3.27258	8.99516	5.63364e-31	8.05182e-30
SLC12A9-AS1	2.36165	6.01155	6.22659e-31	8.87063e-30
UMODL1-AS1	-3.08717	5.56551	7.0902e-31	1.00685e-29
CASC19	6.56488	7.22371	7.29533e-31	1.03432e-29
LINC00892	-2.15957	5.46994	7.3992e-31	1.04737e-29
AL121580.1	4.73522	3.50371	8.52162e-31	1.2024e-29
TTC39A-AS1	-2.18875	4.98789	8.78848e-31	1.23808e-29
AL356299.2	2.33388	5.27153	1.08303e-30	1.5233e-29
AL358115.1	2.09844	5.9785	1.16994e-30	1.64293e-29
AC007639.1	3.06854	4.05378	1.52883e-30	2.13674e-29
AC016888.1	2.57427	8.046	1.87001e-30	2.59756e-29
LINC01605	4.41076	8.82834	1.87029e-30	2.59756e-29
AL133264.2	-2.12758	3.37644	1.87373e-30	2.59826e-29
AC013275.1	-2.64594	5.21411	2.11505e-30	2.92373e-29
BARX1-DT	7.07521	5.42634	3.35893e-30	4.6072e-29
AL354993.1	3.00662	5.81311	3.89609e-30	5.33571e-29
LINC00626	7.64302	8.02631	4.4385e-30	6.05045e-29
AC096637.2	-2.47262	5.08891	4.7642e-30	6.47449e-29
AC233280.1	3.23928	5.12553	7.04995e-30	9.55144e-29
AL359504.2	2.06132	6.25703	7.15925e-30	9.68469e-29
AL138789.1	4.83111	4.93839	7.94206e-30	1.07272e-28
HHATL-AS1	-3.0957	3.52376	8.68189e-30	1.17086e-28
AC091891.2	-2.83797	3.16388	9.28284e-30	1.25e-28
LUARIS	4.65581	5.72107	1.16025e-29	1.55527e-28
AL049539.1	3.06569	4.4559	1.25236e-29	1.67366e-28
AL008628.1	-2.07743	3.16882	1.29142e-29	1.72325e-28
AL023754.1	6.29161	5.92764	1.31531e-29	1.75249e-28
LSAMP-AS1	4.79128	5.56318	1.31883e-29	1.75453e-28
LINC02043	4.46807	5.69625	1.32789e-29	1.76394e-28
HOTTIP	5.92326	4.75799	1.62137e-29	2.14414e-28
AC004832.1	-2.94682	5.76675	1.8156e-29	2.38671e-28
AP003119.3	2.57675	9.23643	2.03977e-29	2.67346e-28
AC013391.3	5.11948	4.15815	2.63999e-29	3.44484e-28
AL451069.2	-2.13003	3.32302	2.7022e-29	3.52082e-28
AP000679.1	3.37074	4.16509	2.7082e-29	3.52345e-28
AC091588.1	-2.32261	2.86892	3.02407e-29	3.91712e-28
AP003721.1	3.12338	4.81403	3.51764e-29	4.54979e-28
C2orf48	2.80086	6.49745	4.9362e-29	6.36598e-28
AC097347.1	3.05709	4.91004	5.64695e-29	7.26142e-28
LINC01468	7.40472	7.11145	5.93175e-29	7.60554e-28
AL133353.1	2.739	5.51973	6.79407e-29	8.69857e-28
AC025244.1	5.79548	5.25159	7.11344e-29	9.09431e-28
LINC01063	2.59307	6.05171	7.21144e-29	9.20629e-28
LINC00355	7.63846	6.66906	7.79813e-29	9.92663e-28
AC005753.1	-2.15076	3.33799	8.60391e-29	1.09209e-27
AC012640.1	2.94855	3.5119	1.04508e-28	1.32272e-27
AC010719.1	2.29841	6.39293	1.04954e-28	1.32647e-27
AC113346.1	4.61659	5.04389	1.17949e-28	1.48858e-27
AL139412.1	3.78068	5.36481	1.36264e-28	1.7124e-27
AC007663.2	-2.33156	3.75656	1.36719e-28	1.71568e-27
AL354707.1	2.94776	8.18983	1.46487e-28	1.83306e-27
LINC00840	-2.56664	3.7012	1.80172e-28	2.24505e-27
AC090844.3	-2.4697	3.21153	2.47475e-28	3.07502e-27
AC083880.1	2.11991	5.91309	3.40582e-28	4.21417e-27
AL513318.2	4.20775	9.54827	3.99039e-28	4.9237e-27
LINC02360	-3.31438	2.59169	4.11714e-28	5.06597e-27
ATP2A1-AS1	2.24187	6.4508	4.50948e-28	5.53334e-27
AL035530.1	-2.19175	3.4525	6.49794e-28	7.92928e-27
AC020763.1	-2.13131	3.07965	6.66568e-28	8.12276e-27
AC091182.2	4.65708	6.58221	7.29433e-28	8.87661e-27
LINC01747	-2.04404	3.47929	8.01723e-28	9.74292e-27
LINC00619	-2.32803	3.19875	8.75377e-28	1.06234e-26
AC023034.2	3.54732	5.05789	8.91981e-28	1.08101e-26
AC004221.1	3.55248	3.96144	9.43074e-28	1.13981e-26
HOXC-AS1	4.00891	5.73061	1.04738e-27	1.26242e-26
AC105118.1	4.96391	5.94628	1.11205e-27	1.33855e-26
LINC01564	4.09312	7.63453	1.20053e-27	1.44308e-26
SATB2-AS1	3.34665	5.01237	1.24309e-27	1.49222e-26
AC112236.1	5.17847	4.75701	1.33769e-27	1.6036e-26
AC011365.2	-2.22121	3.05182	1.34281e-27	1.60756e-26
MIR9-3HG	3.25373	9.6992	1.44636e-27	1.72685e-26
NAALADL2-AS2	5.90867	6.28737	1.70486e-27	2.02727e-26
AC025431.1	-2.74726	2.58065	1.83577e-27	2.17709e-26
LINC01099	-2.1196	3.22678	2.12078e-27	2.50501e-26
AP000526.1	4.38045	4.52576	2.16733e-27	2.55658e-26
AC003958.2	6.26148	5.73796	2.20841e-27	2.60157e-26
AC007996.1	2.271	9.6242	2.38654e-27	2.80395e-26
AC015849.5	3.51135	6.08186	2.42405e-27	2.84424e-26
AC080023.1	2.6172	5.45752	2.68234e-27	3.13897e-26
FAM83C-AS1	2.62595	4.07167	2.9927e-27	3.49754e-26
AC016737.1	2.04634	5.77192	3.17189e-27	3.6972e-26
AC108002.1	2.64532	6.91151	3.2031e-27	3.72376e-26
ABCA9-AS1	4.47019	6.45326	3.25884e-27	3.78359e-26
MYOSLID	3.29843	8.03997	3.32275e-27	3.85273e-26
AC021546.1	-2.3989	2.63063	3.93875e-27	4.56101e-26
AC091868.2	3.62416	4.09088	4.22992e-27	4.89177e-26
LINC01711	3.48632	5.11115	4.55985e-27	5.26644e-26
LINC01208	5.2416	4.24489	5.52646e-27	6.37452e-26
LINC01625	-2.30042	3.21065	5.55747e-27	6.40194e-26
AL357093.1	-2.5413	2.97737	5.82176e-27	6.69767e-26
AL365356.4	4.54787	5.35846	6.33378e-27	7.27727e-26
SRGAP3-AS2	-3.34774	7.58259	8.48169e-27	9.71988e-26
LINC01506	-2.28802	4.35181	8.96508e-27	1.02605e-25
LINC02443	3.9913	3.49344	9.36709e-27	1.0693e-25
AC005865.1	3.11361	5.34353	9.71242e-27	1.10729e-25
LINC00928	4.72183	3.36855	9.73565e-27	1.10851e-25
AC026785.3	7.27523	5.2379	1.0432e-26	1.18627e-25
AL445524.1	2.66272	10.1062	1.16207e-26	1.31974e-25
AC096759.2	5.89847	5.05283	1.18333e-26	1.34217e-25
AC034206.1	4.64643	5.2016	1.33726e-26	1.51094e-25
SOX2-OT	5.42458	11.3206	1.56543e-26	1.76425e-25
AC004080.2	4.74538	3.45526	1.61885e-26	1.81982e-25
C10orf91	3.09177	7.50541	1.66802e-26	1.87272e-25
LINC01385	5.50582	4.18036	1.81728e-26	2.03512e-25
LINC01249	8.26844	7.17863	1.83138e-26	2.04832e-25
AL356234.2	5.30073	6.01567	1.95554e-26	2.18167e-25
LEF1-AS1	2.05694	5.90011	1.96046e-26	2.1844e-25
LINC00858	4.37266	5.8464	2.12051e-26	2.35977e-25
AC019155.3	5.71462	5.82219	2.6084e-26	2.89542e-25
SLC9A3-AS1	2.69042	11.1384	2.73387e-26	3.03089e-25
LINC01765	-3.27646	4.71236	2.84142e-26	3.14226e-25
MAGEA10-MAGEA5	5.38365	4.72317	3.08609e-26	3.40008e-25
AC103702.2	5.39458	8.06357	3.26257e-26	3.58113e-25
KC877392.1	-2.18231	2.89991	3.39897e-26	3.72623e-25
AC019211.1	3.63156	3.37773	4.16254e-26	4.55768e-25
AC011337.1	2.22394	7.17605	6.01441e-26	6.54484e-25
LINC01206	9.36287	11.8381	6.05895e-26	6.5852e-25
LINC00592	2.98005	5.66804	6.13555e-26	6.66027e-25
MAGEA4-AS1	8.01798	7.7545	6.23754e-26	6.76268e-25
AC091153.3	2.51117	4.91884	6.26087e-26	6.77967e-25
LINC01968	3.4132	4.17166	6.33816e-26	6.85497e-25
AC003070.2	-2.07641	2.96164	7.97076e-26	8.56833e-25
AC116312.1	-2.24101	3.30212	1.06255e-25	1.13806e-24
AC020911.2	-2.49941	2.7357	1.29604e-25	1.38312e-24
AC246793.1	4.51716	4.91786	1.34175e-25	1.43017e-24
AC016717.2	-2.51295	6.8182	1.35605e-25	1.44368e-24
AL009179.1	2.02015	6.49218	1.66326e-25	1.76438e-24
AL023755.1	2.87455	3.58981	1.8754e-25	1.98228e-24
AC044810.2	-2.05651	5.23879	1.93083e-25	2.03843e-24
AL138737.1	-3.20984	3.10564	2.02181e-25	2.13193e-24
AC006262.1	3.49043	7.33848	2.30278e-25	2.42281e-24
LINC01524	4.65885	4.88437	2.35062e-25	2.46983e-24
ARNTL2-AS1	3.84236	3.93205	2.3762e-25	2.49374e-24
AC006329.1	3.00562	8.53998	2.38243e-25	2.49731e-24
DLX2-DT	5.47536	4.03734	2.4579e-25	2.57337e-24
AC011352.3	4.85402	4.26406	2.7611e-25	2.8874e-24
MAFA-AS1	4.87989	5.52564	2.81584e-25	2.94118e-24
AC007278.2	-2.34888	2.7812	2.82649e-25	2.94882e-24
LINC00393	7.77666	6.55075	2.86826e-25	2.98535e-24
AP002784.1	4.59745	6.48916	3.26791e-25	3.39334e-24
AC108136.1	4.62743	4.86191	3.81014e-25	3.94249e-24
FSIP2-AS1	2.78855	5.01895	4.0402e-25	4.17566e-24
AC011899.1	-3.18576	3.48083	4.48286e-25	4.61698e-24
AC092115.3	3.0324	5.37398	5.09986e-25	5.24024e-24
AC103923.1	2.3504	4.75788	5.80606e-25	5.95896e-24
AC117394.2	2.42053	4.24789	6.31323e-25	6.46448e-24
AC005908.2	-2.8724	2.6006	7.82594e-25	7.98571e-24
AL445072.1	4.95123	3.72697	8.09576e-25	8.25152e-24
AL662860.1	-2.31701	3.73665	8.43875e-25	8.59121e-24
AC104794.3	5.90135	4.99667	8.53048e-25	8.67462e-24
AL008733.1	-2.9376	3.66608	8.95191e-25	9.08229e-24
AL139327.2	6.16735	5.07185	9.80857e-25	9.92865e-24
AC027031.2	2.36134	8.68418	9.95959e-25	1.007e-23
AC091544.2	-2.45106	4.45438	1.0423e-24	1.05025e-23
AL645924.1	-2.59572	3.72782	1.22893e-24	1.2341e-23
AC027281.1	-3.27386	4.1942	1.34732e-24	1.35145e-23
AC010255.2	-2.35618	3.87667	1.41763e-24	1.42035e-23
LINC00930	-2.56701	5.21008	1.42228e-24	1.4234e-23
AL035258.1	7.24409	6.43285	1.44033e-24	1.43985e-23
LINC02457	6.07883	4.543	1.50398e-24	1.49892e-23
SATB1-AS1	2.23226	7.9024	1.50451e-24	1.49892e-23
HOXD-AS2	3.71843	6.27181	1.53401e-24	1.52659e-23
AC020658.4	3.4696	3.54795	1.68127e-24	1.67126e-23
AC090673.1	2.59743	6.47136	1.84621e-24	1.8311e-23
AC090282.1	4.97997	4.20662	2.0656e-24	2.04183e-23
AC012467.1	-2.24078	2.8288	2.06913e-24	2.04303e-23
LINC01671	-2.07498	7.35073	2.16702e-24	2.13492e-23
LINC01844	-2.18588	3.74969	2.52782e-24	2.48488e-23
AL157955.2	-2.33981	2.56664	2.52785e-24	2.48488e-23
SH3PXD2A-AS1	3.81532	9.01077	2.66585e-24	2.61472e-23
LINC01456	6.2422	5.80869	2.75151e-24	2.69277e-23
LINC02512	-3.09	2.76517	3.02705e-24	2.95588e-23
LINC01827	-2.84609	3.55324	3.20987e-24	3.13095e-23
AC067863.1	4.15247	3.4862	3.34574e-24	3.25988e-23
AC015908.2	-2.0774	2.97051	3.44932e-24	3.35342e-23
LINC02321	2.86142	5.21378	3.64108e-24	3.53596e-23
AC018616.1	4.38756	3.57909	4.095e-24	3.96807e-23
AC040174.2	4.44915	4.20692	4.34863e-24	4.20922e-23
GACAT2	4.2075	4.32498	4.5017e-24	4.35263e-23
LINC01518	8.21285	6.29139	4.52115e-24	4.36666e-23
AC091849.2	-2.4429	6.05811	4.68631e-24	4.52124e-23
AL353693.1	4.20651	4.31109	5.28356e-24	5.09191e-23
AC090709.1	3.26756	3.77248	5.44139e-24	5.2383e-23
AL589765.7	-2.61337	2.84192	5.84769e-24	5.61722e-23
AC008649.1	5.01511	5.99753	6.66847e-24	6.39869e-23
LINC02473	4.70427	4.01667	6.92088e-24	6.63369e-23
LINC02416	2.56972	4.45376	7.29395e-24	6.97617e-23
HOTAIR	6.57864	7.16079	8.32678e-24	7.92971e-23
AC107308.1	5.08421	3.92867	8.50949e-24	8.095e-23
LINC01876	2.29533	7.13622	8.81258e-24	8.37432e-23
AC090912.1	2.24367	5.51089	8.84994e-24	8.40079e-23
LINC02012	3.03193	7.24593	9.38093e-24	8.88577e-23
KCNQ1-AS1	-2.05675	2.69876	1.08014e-23	1.01985e-22
MIR1-1HG-AS1	-2.12062	3.83738	1.22866e-23	1.15638e-22
AL157400.2	3.78142	3.70352	1.31931e-23	1.23906e-22
LINC01612	-2.76766	5.02905	1.35483e-23	1.26972e-22
AC100791.2	4.28138	3.85509	1.38152e-23	1.29336e-22
AC018695.6	2.83496	5.6425	1.61215e-23	1.50479e-22
PKP4-AS1	2.91108	7.76113	1.73887e-23	1.61765e-22
AC090001.1	-2.56702	4.1348	1.97888e-23	1.83898e-22
AC023301.1	3.77928	5.96725	2.17192e-23	2.01415e-22
AL358332.1	2.90142	4.44547	2.28373e-23	2.11562e-22
LINC00885	2.72558	9.48516	2.33263e-23	2.15866e-22
HOXC-AS3	6.47444	5.57262	2.37509e-23	2.19565e-22
LINC02109	5.72989	5.80851	2.48802e-23	2.29766e-22
AC133794.1	-2.51055	4.80853	2.9594e-23	2.72727e-22
LINC02014	2.65599	6.23941	3.50552e-23	3.22384e-22
AC073365.1	7.74964	7.90298	4.3008e-23	3.93476e-22
LINC02323	3.16993	6.42622	5.04284e-23	4.5758e-22
LINC01905	3.67103	5.18476	6.50881e-23	5.89391e-22
AC090970.3	2.00471	6.12742	6.64342e-23	6.0035e-22
AC022075.2	3.54719	4.9589	6.8094e-23	6.14722e-22
AL133325.3	6.29499	5.64864	7.81494e-23	7.04778e-22
AC126768.1	5.12228	4.51086	8.44914e-23	7.60423e-22
AL451050.2	2.09972	4.9296	8.51737e-23	7.65784e-22
AC068631.1	3.01921	5.57389	9.07141e-23	8.13942e-22
LINC01561	3.8014	5.1717	9.58544e-23	8.59193e-22
AF131216.3	5.19015	6.0482	1.01053e-22	9.04875e-22
AC012501.1	5.97665	4.6745	1.07629e-22	9.60841e-22
LINC00941	3.74143	7.98173	1.17403e-22	1.04704e-21
AL445471.1	2.16216	4.9427	1.30862e-22	1.16356e-21
LINC01322	4.52913	5.6192	1.39078e-22	1.23412e-21
PARD3-AS1	2.37457	5.47247	1.47824e-22	1.3078e-21
KIF26B-AS1	-2.26138	3.83713	1.58598e-22	1.40031e-21
AL590644.1	5.27179	6.34253	1.59137e-22	1.40367e-21
AC106772.1	3.2914	3.44023	1.91422e-22	1.68007e-21
AL023803.3	3.00996	3.68646	1.98065e-22	1.73665e-21
AC092142.1	2.6737	6.95512	2.35396e-22	2.05786e-21
NKX2-1-AS1	-2.53265	7.08078	2.37088e-22	2.0706e-21
AL160408.4	5.40532	4.41682	2.5323e-22	2.20722e-21
AC113189.4	3.09668	3.37621	2.65347e-22	2.30829e-21
LINC00337	2.55747	5.96177	2.73507e-22	2.37694e-21
LINC01559	5.85478	8.55679	2.7969e-22	2.42828e-21
AC025211.1	2.94092	3.98109	2.85278e-22	2.47437e-21
LINC01833	6.84478	7.02295	2.883e-22	2.49568e-21
AC131157.1	6.51195	5.07248	2.88779e-22	2.49739e-21
LINC01732	-2.30795	2.88838	3.10901e-22	2.68607e-21
AC017100.1	2.02233	7.13571	3.26953e-22	2.822e-21
CYP4F26P	3.36744	6.73327	3.34122e-22	2.88107e-21
AC106738.2	-2.44765	2.92872	3.72278e-22	3.20383e-21
AP005328.1	4.08322	5.06838	3.82866e-22	3.29175e-21
AC019080.4	5.02773	7.5415	3.98312e-22	3.4146e-21
AC114296.1	4.162	4.78427	4.0858e-22	3.49923e-21
AC084816.1	5.69454	6.12277	4.15933e-22	3.55876e-21
LINC00942	7.05452	10.7408	4.18009e-22	3.57307e-21
AC112484.3	2.43406	6.68214	4.57073e-22	3.88487e-21
AL033397.1	7.77079	11.5735	4.60982e-22	3.91017e-21
AC012531.1	3.57193	5.45453	5.22942e-22	4.42301e-21
AC099066.2	3.13253	6.64614	5.69819e-22	4.79656e-21
LINC02076	2.8474	4.55388	5.80295e-22	4.8801e-21
LINC01901	4.82306	6.21214	5.96618e-22	5.01261e-21
AL359551.1	4.94386	5.09871	6.18747e-22	5.1936e-21
LINC01705	3.63786	5.88616	6.2683e-22	5.25646e-21
AL021877.2	6.04075	5.4727	6.63239e-22	5.55651e-21
LINC02542	2.3441	8.34915	6.69709e-22	5.60541e-21
AC005324.1	-3.22007	3.0101	6.92212e-22	5.78014e-21
MNX1-AS1	4.76984	7.08295	6.92546e-22	5.78014e-21
AC012409.1	-2.18422	2.65301	7.48694e-22	6.22528e-21
LINC01133	4.22833	10.9069	7.94553e-22	6.60039e-21
AC106795.2	2.24056	6.69652	8.0955e-22	6.71866e-21
KCNQ5-IT1	4.201	3.60964	8.69205e-22	7.20699e-21
AC137834.2	2.56358	3.55259	8.71682e-22	7.22076e-21
LINC01513	-2.53354	3.81663	8.86588e-22	7.33737e-21
AC073321.1	4.01308	3.46251	9.37772e-22	7.74647e-21
AC136489.1	-2.02007	2.63298	9.90358e-22	8.16561e-21
AC108676.1	4.861	8.4244	1.00962e-21	8.3167e-21
AL138720.1	2.8774	4.40172	1.05698e-21	8.69867e-21
AC131009.2	3.97341	4.14722	1.13096e-21	9.29028e-21
AL391807.1	-2.20499	4.78731	1.21628e-21	9.98182e-21
AL391427.1	3.84791	6.61921	1.25224e-21	1.02647e-20
CASC20	5.08695	6.33679	1.25306e-21	1.02647e-20
LINC01611	6.16932	5.04518	1.27918e-21	1.04601e-20
AC073352.1	2.18009	4.22901	1.27928e-21	1.04601e-20
AC093599.1	4.46389	4.10171	1.29807e-21	1.06039e-20
AC078802.1	2.37578	5.76489	1.30123e-21	1.06199e-20
AC097713.1	6.24719	6.32632	1.33085e-21	1.08517e-20
AL390719.2	2.11635	8.27851	1.40988e-21	1.14749e-20
AC068228.1	4.82384	4.11032	1.45513e-21	1.18323e-20
AC123023.1	-2.85113	3.66877	1.54133e-21	1.25217e-20
U47924.1	2.37907	3.79792	1.56415e-21	1.26954e-20
LINC00871	5.43082	5.91136	1.57842e-21	1.27995e-20
AC009501.1	2.43242	7.96423	1.78776e-21	1.44573e-20
AC005592.1	-2.08224	2.81998	1.85507e-21	1.4988e-20
PART1	4.50053	9.06116	1.87317e-21	1.51204e-20
AL512638.2	-2.6574	2.77385	1.88708e-21	1.52188e-20
IGFL2-AS1	5.25057	9.32771	1.89696e-21	1.52845e-20
AC087667.1	4.72074	4.91838	2.12771e-21	1.70971e-20
AL161431.1	5.37532	10.9882	2.231e-21	1.78945e-20
LINC01166	-2.85327	3.57092	2.3945e-21	1.91711e-20
AC117402.1	3.95952	7.69975	2.46916e-21	1.97511e-20
LINC01615	3.46767	7.27618	2.53746e-21	2.0279e-20
AC027243.2	3.67277	3.24346	3.0176e-21	2.3971e-20
AC011444.2	-2.51785	3.05783	3.01839e-21	2.3971e-20
AC243836.1	-2.01295	2.94768	3.03639e-21	2.40923e-20
AC036108.4	2.66191	4.88083	3.23178e-21	2.55739e-20
AP001094.3	-2.47936	2.94419	3.47583e-21	2.74805e-20
BLACAT1	2.75472	8.92065	3.71227e-21	2.92974e-20
SMILR	3.83861	5.07723	3.73324e-21	2.94367e-20
AL589986.2	4.02923	4.45685	3.75491e-21	2.95812e-20
AL079303.1	3.48318	7.12441	3.93218e-21	3.09502e-20
AC010731.2	4.58989	5.55545	4.09833e-21	3.21721e-20
AC007881.3	2.30031	4.53703	4.1879e-21	3.2817e-20
LINC01971	3.336	3.97591	4.23178e-21	3.31315e-20
AC091544.5	-2.02318	2.9516	4.31538e-21	3.36965e-20
AC005256.1	5.56911	4.33385	4.65726e-21	3.6302e-20
AC025470.2	-2.72555	2.79659	5.68186e-21	4.41717e-20
LINC02003	3.52287	3.63568	5.69652e-21	4.42468e-20
AP000525.1	2.55294	5.353	6.52244e-21	5.05289e-20
AP001360.2	7.82777	6.61099	6.55899e-21	5.07676e-20
LINC01393	2.16887	5.44775	7.24732e-21	5.59485e-20
AC113349.1	-3.12077	4.1419	7.80515e-21	6.01499e-20
AC011498.3	2.72781	3.57281	8.07164e-21	6.21496e-20
AC005863.1	5.61266	5.37803	8.24777e-21	6.34505e-20
AL161618.1	-3.0847	4.23119	9.10381e-21	6.99144e-20
AC010913.1	2.13731	4.98241	9.48567e-21	7.27838e-20
AC092669.1	4.46615	3.26953	9.78074e-21	7.49828e-20
AC087392.2	-2.42383	3.87105	9.84335e-21	7.53975e-20
AC093520.1	2.77137	4.91331	9.88062e-21	7.56175e-20
LINC01775	2.42687	3.86715	1.05891e-20	8.08297e-20
AC010255.1	-2.11443	3.80942	1.07216e-20	8.17706e-20
LINC02438	5.6644	4.30094	1.11482e-20	8.47323e-20
MLIP-IT1	3.37369	4.32862	1.12451e-20	8.53951e-20
AL357093.2	-2.51177	6.5126	1.17077e-20	8.87556e-20
LINC01361	2.86634	4.16383	1.18776e-20	8.99664e-20
AL035458.2	2.27889	4.84527	1.21154e-20	9.16893e-20
AL158847.1	-2.21012	3.38978	1.23994e-20	9.36784e-20
AP000696.1	4.84312	4.11308	1.27857e-20	9.64325e-20
AL592043.1	5.63784	4.03621	1.30068e-20	9.79332e-20
LINC01280	4.86451	3.52685	1.35911e-20	1.02245e-19
LINC01842	3.9957	6.0816	1.56681e-20	1.17571e-19
LINC01391	5.61308	4.69828	1.69746e-20	1.27158e-19
KC877982.1	7.54286	6.65326	1.78693e-20	1.33748e-19
AL122058.1	3.52329	5.25203	1.91152e-20	1.42952e-19
AC012625.1	3.40096	4.20676	2.08042e-20	1.55059e-19
AC122710.3	3.33119	4.79439	2.23382e-20	1.66352e-19
IL20RB-AS1	4.69434	3.98079	2.25718e-20	1.67809e-19
AL355472.4	2.9644	5.60534	2.3191e-20	1.72267e-19
AC105460.2	6.02852	4.89983	2.32612e-20	1.72644e-19
AF165147.1	3.69901	9.88997	2.4619e-20	1.82416e-19
AC010980.2	2.61997	7.66348	2.59339e-20	1.91837e-19
LINC01168	-2.63367	3.05862	3.12521e-20	2.2945e-19
AC122685.1	6.4503	6.92806	3.13325e-20	2.29849e-19
PTCSC2	4.49766	4.8861	3.54955e-20	2.59743e-19
AC010343.3	5.13388	5.61846	3.58718e-20	2.62279e-19
LINC01116	2.82676	8.81621	3.84666e-20	2.79864e-19
LINC02041	2.63865	7.04571	3.92784e-20	2.85535e-19
AL136018.1	5.29917	6.74241	4.07355e-20	2.95641e-19
LINC01202	5.69516	4.08825	4.65753e-20	3.37471e-19
AP000697.1	4.10997	3.12266	4.69875e-20	3.40179e-19
LINC01460	2.94357	6.42276	4.7811e-20	3.45858e-19
AL139819.1	-2.18286	2.55093	5.69493e-20	4.09952e-19
LINC02315	3.83156	7.48908	6.64881e-20	4.77064e-19
AC093083.1	3.5924	3.3574	6.88677e-20	4.93738e-19
AC068025.1	2.54743	4.87712	7.36361e-20	5.26218e-19
AC009630.2	3.1141	3.2228	7.52584e-20	5.37378e-19
AC015818.2	3.72178	3.66768	7.58477e-20	5.41149e-19
LINC00645	3.68413	3.49593	7.79581e-20	5.55758e-19
AC006064.3	2.04138	4.5119	7.81124e-20	5.5641e-19
LINC00896	2.39406	5.42949	7.99397e-20	5.6851e-19
AC012349.1	-2.39414	3.80263	8.89282e-20	6.31419e-19
AL138900.2	-2.87886	3.94	9.56579e-20	6.78114e-19
LINC00615	6.70744	5.24876	1.0022e-19	7.08751e-19
AC067930.5	2.77657	5.5066	1.11709e-19	7.86855e-19
AL160408.5	4.32326	3.58163	1.15615e-19	8.13071e-19
AC109454.3	5.68051	6.27951	1.16024e-19	8.153e-19
RAPGEF4-AS1	3.09494	3.36201	1.37123e-19	9.59752e-19
UCA1	4.73056	8.71692	1.40456e-19	9.82302e-19
ATP11A-AS1	-2.09857	2.57512	1.4662e-19	1.0246e-18
AC007182.1	-2.27612	4.10693	1.47825e-19	1.03221e-18
AC024230.1	5.29481	4.72263	1.50199e-19	1.04796e-18
AC025219.1	2.27023	4.55401	1.50899e-19	1.05201e-18
AC106779.1	2.22579	4.12516	1.58104e-19	1.10138e-18
KCNH1-IT1	5.11635	4.2477	1.58379e-19	1.10242e-18
AC092834.1	-2.51819	2.94193	1.86918e-19	1.29801e-18
LINC00466	4.34899	3.86606	2.30546e-19	1.59471e-18
AC107419.1	4.76623	4.83816	2.32365e-19	1.60604e-18
AC126768.2	3.21353	7.23315	2.33255e-19	1.61094e-18
AL139039.3	2.77086	4.87772	2.55276e-19	1.76164e-18
AC093904.2	3.42638	4.82325	2.66922e-19	1.83914e-18
AC009988.1	4.917	3.46725	2.79153e-19	1.92192e-18
AC100782.1	3.5128	3.47517	2.89693e-19	1.99294e-18
AP003559.1	2.6639	5.60628	3.74289e-19	2.56494e-18
AP005233.2	5.72566	5.9564	4.13188e-19	2.82931e-18
LINC02178	6.29479	5.64696	4.50022e-19	3.0744e-18
LINC00173	2.23466	7.12817	4.51184e-19	3.07996e-18
AL161937.2	2.15299	5.52651	4.83611e-19	3.2937e-18
AC007848.2	3.8748	3.46723	5.37911e-19	3.65788e-18
LINC01992	6.93596	5.95777	5.43093e-19	3.69028e-18
LINC02561	3.76661	7.59533	5.45616e-19	3.70457e-18
AC091544.4	-2.01732	5.90366	5.56697e-19	3.77692e-18
LINC02560	2.35583	6.87653	5.81691e-19	3.93743e-18
AC120498.4	5.05087	4.99858	6.47617e-19	4.38033e-18
AC027243.1	3.12116	3.51644	6.64594e-19	4.49172e-18
AP002478.1	3.85296	6.07319	6.88817e-19	4.64833e-18
AC010605.1	2.938	3.51138	7.19776e-19	4.85355e-18
STEAP2-AS1	2.6569	3.86357	7.94165e-19	5.33889e-18
AC138904.1	3.25405	6.65289	9.60916e-19	6.44032e-18
LINC00461	5.15918	5.44752	1.061e-18	7.09495e-18
AC115099.1	-2.00034	3.54173	1.06549e-18	7.1196e-18
AC012360.1	2.08494	3.94387	1.18984e-18	7.92656e-18
AC134312.5	2.4754	6.3376	1.20713e-18	8.03572e-18
AC093904.4	3.41728	6.35212	1.2422e-18	8.25054e-18
LINC01527	5.12404	6.29755	1.28032e-18	8.48462e-18
AP001790.1	4.51643	5.40742	1.29235e-18	8.55795e-18
LINC02465	3.7051	2.78028	1.35343e-18	8.95574e-18
AL138760.1	4.03468	4.64722	1.44873e-18	9.57913e-18
LINC02159	3.50375	7.29643	1.47578e-18	9.75073e-18
AP000553.2	2.24355	4.33153	1.48336e-18	9.79352e-18
F11-AS1	-2.40856	5.30044	1.49155e-18	9.84024e-18
LINC00392	9.32933	7.96202	1.51347e-18	9.97738e-18
U62317.1	4.32886	7.8641	1.61284e-18	1.06166e-17
AC005722.2	3.66051	6.98886	1.71523e-18	1.12823e-17
AL049794.1	2.22757	4.66887	1.78639e-18	1.17329e-17
AL136172.1	2.36134	3.73509	1.83115e-18	1.20179e-17
AL359378.1	-2.65317	2.96906	2.15115e-18	1.40348e-17
AL355483.1	3.32453	3.18202	2.18194e-18	1.42147e-17
AC010894.3	3.94336	7.53252	2.2497e-18	1.46131e-17
AL163953.1	6.33637	4.78929	2.25551e-18	1.46402e-17
AL354719.2	3.77574	8.37512	2.35006e-18	1.52426e-17
AL163952.1	4.45588	5.9731	2.35216e-18	1.52451e-17
LINC01614	2.84911	7.92043	2.51089e-18	1.62382e-17
AC026336.3	5.81618	5.94341	2.51506e-18	1.62533e-17
IGF2BP2-AS1	3.15017	5.32198	2.65554e-18	1.71361e-17
AL049649.1	5.69019	5.34658	2.74942e-18	1.7716e-17
AC004034.1	2.4177	5.42806	2.79867e-18	1.80071e-17
HOXB-AS4	5.03088	5.24432	2.86839e-18	1.84289e-17
AL445489.1	-2.49027	3.06096	3.288e-18	2.10637e-17
AC012447.1	2.00469	5.3124	3.32263e-18	2.12701e-17
AC069431.1	3.86776	4.72415	3.40309e-18	2.17695e-17
SALRNA1	2.32288	4.60035	3.43268e-18	2.19429e-17
AC097717.1	2.18987	4.03287	4.0643e-18	2.59055e-17
AC011352.1	3.68655	3.49847	4.14668e-18	2.64116e-17
AC037486.1	4.66204	3.53784	4.33367e-18	2.75827e-17
AL137804.1	3.64414	3.07863	4.41847e-18	2.8082e-17
AC007785.1	4.13035	5.70614	4.68695e-18	2.9767e-17
AC034223.2	5.045	3.91844	4.89238e-18	3.10494e-17
U62317.2	2.11528	8.52113	4.96567e-18	3.14919e-17
AC007966.1	2.596	5.11539	5.26001e-18	3.33109e-17
AC008556.1	2.17215	9.90454	5.31182e-18	3.36149e-17
LINC01416	3.52721	3.37142	6.22507e-18	3.92539e-17
AL109615.3	2.44812	8.50667	6.29334e-18	3.96561e-17
AC007389.3	4.05841	4.67228	6.42656e-18	4.04667e-17
AC019080.1	2.31393	10.3744	6.61945e-18	4.16221e-17
LINC00470	4.07378	7.70704	6.65883e-18	4.184e-17
LINC00536	5.69003	4.81899	6.98489e-18	4.38575e-17
LINC00462	5.0427	5.67781	7.67804e-18	4.81414e-17
AC007608.1	-2.02982	4.05445	8.55198e-18	5.35074e-17
LINC02137	3.51097	5.7545	8.89727e-18	5.56284e-17
LINC00443	-2.0022	3.19911	8.93443e-18	5.58213e-17
XXYLT1-AS1	2.8474	4.03753	8.9629e-18	5.59202e-17
AL451069.1	-2.24566	3.31022	9.12787e-18	5.69093e-17
LINC02310	4.39543	4.10115	1.04994e-17	6.52304e-17
AL078590.2	4.32822	8.67978	1.13924e-17	7.063e-17
AC090673.2	3.62874	3.55797	1.14692e-17	7.10563e-17
AL365181.3	3.76299	10.4186	1.17557e-17	7.27803e-17
AC055736.1	5.25801	4.25999	1.19728e-17	7.40722e-17
AC126407.1	3.66693	3.91785	1.19947e-17	7.41557e-17
AC008663.1	5.28434	4.65054	1.28725e-17	7.94165e-17
SMCR2	2.34802	3.40738	1.40814e-17	8.65729e-17
AP006545.2	2.36311	4.62453	1.41104e-17	8.66309e-17
AC079062.1	7.54139	8.67774	1.42993e-17	8.77298e-17
APCDD1L-DT	3.80325	6.70632	1.51945e-17	9.31571e-17
AL589182.1	5.90881	4.08189	1.52793e-17	9.3612e-17
AL512625.2	2.28565	5.06538	1.59071e-17	9.73238e-17
LINP1	4.20608	7.17802	1.61706e-17	9.88678e-17
AL133153.2	2.22311	3.6862	1.69802e-17	1.03674e-16
AC245100.6	3.62297	3.85562	1.82279e-17	1.11138e-16
AC099520.1	4.8241	3.30697	1.91164e-17	1.16315e-16
AL031848.1	3.0257	4.32323	2.00073e-17	1.21653e-16
LINC01592	3.70752	4.17602	2.07883e-17	1.26228e-16
AL355472.3	2.82093	5.03354	2.28667e-17	1.38658e-16
DGCR9	2.18148	6.79658	2.33918e-17	1.41745e-16
AC022201.1	5.36908	4.04192	2.5254e-17	1.52715e-16
AL590708.1	2.01733	4.61308	2.85924e-17	1.72431e-16
AC091729.1	2.85469	5.04671	3.94098e-17	2.36218e-16
AL160191.1	-2.47487	2.69024	4.00139e-17	2.39677e-16
AL356740.3	2.84901	5.23273	4.23666e-17	2.53255e-16
MIR31HG	4.21019	6.60621	4.27087e-17	2.55128e-16
TM4SF1-AS1	2.64276	7.1737	4.39606e-17	2.62429e-16
LINC01429	3.29789	3.38892	4.45978e-17	2.66053e-16
AC120498.2	-2.10945	4.54424	4.52975e-17	2.69863e-16
AC105219.2	2.75784	4.69401	4.61685e-17	2.74498e-16
DSCR9	2.25397	5.09608	4.93562e-17	2.93253e-16
LINC01697	4.62841	7.26969	5.05341e-17	3.0005e-16
AC103740.2	3.80466	4.02504	5.52341e-17	3.27298e-16
GDNF-AS1	3.64537	6.66929	5.83724e-17	3.4474e-16
ATP6V1B1-AS1	3.00297	4.16908	5.98652e-17	3.53085e-16
AC092746.1	-2.59025	2.69936	6.97967e-17	4.11113e-16
AC002351.1	6.07451	5.54002	7.15248e-17	4.20731e-16
AC015660.1	3.29923	5.1407	7.19495e-17	4.22948e-16
AC008687.2	2.45774	3.82262	7.49995e-17	4.40585e-16
AC124067.2	2.84396	7.53526	7.51451e-17	4.41147e-16
AC020658.3	2.5538	2.81892	7.95927e-17	4.66329e-16
TBL1XR1-AS1	2.48176	3.83569	8.03362e-17	4.70373e-16
AP000864.1	2.3817	3.75839	8.13001e-17	4.75388e-16
AL365199.1	-2.42833	3.13811	8.24914e-17	4.81717e-16
LINC01117	2.50102	5.33768	8.91607e-17	5.2032e-16
LINC02544	2.52499	5.89253	9.16727e-17	5.34626e-16
AC023310.4	5.19497	5.98153	1.0649e-16	6.17783e-16
AL355607.2	5.3148	5.08197	1.14439e-16	6.62158e-16
AL353770.4	-2.89515	3.42757	1.23702e-16	7.13891e-16
AC009955.2	3.34706	3.5152	1.30936e-16	7.5465e-16
AC073316.1	5.26014	4.843	1.3803e-16	7.93984e-16
LINC01811	-2.52924	3.12671	1.43161e-16	8.21899e-16
LHFPL3-AS1	-2.36748	3.94304	1.47147e-16	8.44233e-16
LINC00570	-2.01257	2.84539	1.57583e-16	9.02938e-16
LINC02141	5.3508	4.0411	1.6161e-16	9.25416e-16
AC089987.2	3.46473	3.69741	1.70753e-16	9.77134e-16
AL365356.3	4.7218	6.8212	1.71717e-16	9.82018e-16
AC093865.1	3.1876	4.61483	1.80714e-16	1.0328e-15
AL365181.2	4.27122	8.67053	1.97765e-16	1.12734e-15
MIR137HG	6.20611	5.94563	2.07502e-16	1.18208e-15
AL136221.1	2.72113	4.45809	2.11242e-16	1.20261e-15
AL022324.3	3.19245	3.57314	2.16079e-16	1.22865e-15
AC012174.1	3.2946	4.36828	2.36996e-16	1.34318e-15
LINC00665	2.17018	11.3331	2.40077e-16	1.35977e-15
AL590666.2	3.20215	7.87965	2.47948e-16	1.40345e-15
ELDR	4.81333	5.75216	2.5593e-16	1.44771e-15
AC125616.1	4.2754	3.84505	2.59895e-16	1.46826e-15
AP000880.1	2.23598	5.31076	2.61822e-16	1.4782e-15
LINC00492	3.00015	2.62394	2.65298e-16	1.49687e-15
AC084346.2	2.13947	3.62334	2.66328e-16	1.50172e-15
AC078860.1	3.53216	3.71013	2.72171e-16	1.53272e-15
AP000527.1	6.22428	4.50449	2.75267e-16	1.54916e-15
ATP13A4-AS1	-2.64005	5.65431	2.76362e-16	1.55434e-15
AC090568.2	2.95913	3.96709	3.19238e-16	1.78753e-15
AP000688.1	2.1705	6.2509	3.34952e-16	1.87197e-15
AP001208.2	3.43548	3.15823	3.39716e-16	1.89518e-15
AL008721.1	3.70475	3.11903	3.39748e-16	1.89518e-15
CASC11	3.04557	5.48212	3.53751e-16	1.97204e-15
AC068196.1	2.13698	3.2308	3.66538e-16	2.04204e-15
LINC01194	8.00628	6.75169	3.84532e-16	2.14094e-15
AL645608.3	2.87517	5.43833	4.1656e-16	2.31489e-15
AC120042.2	3.10037	2.85227	4.61617e-16	2.56206e-15
AC112178.1	5.97614	4.47813	4.65144e-16	2.5784e-15
AC034223.1	4.99273	3.7123	4.70631e-16	2.60718e-15
AP003063.1	3.83077	4.66942	5.02986e-16	2.78468e-15
WNT5A-AS1	2.21956	7.49038	5.04084e-16	2.78901e-15
AFAP1-AS1	4.60642	11.04	5.11405e-16	2.82775e-15
AL049830.3	2.64045	5.01499	5.49819e-16	3.03636e-15
LINC00184	2.62378	5.05735	5.6889e-16	3.13602e-15
SLC12A5-AS1	2.13307	6.05014	5.76661e-16	3.17468e-15
CU639417.4	2.72439	3.5361	5.97945e-16	3.28981e-15
AC093702.1	3.40585	4.45565	6.08719e-16	3.34701e-15
AL032819.1	2.45957	3.24481	6.20821e-16	3.40932e-15
AC005330.1	2.77367	5.42665	6.45863e-16	3.54244e-15
LINC01956	5.10757	5.04716	6.77321e-16	3.70808e-15
AL121772.1	2.07479	6.77193	6.92812e-16	3.79054e-15
AC009081.1	5.07266	3.64259	7.04572e-16	3.8525e-15
AC018781.1	2.61091	5.0243	7.81837e-16	4.24872e-15
AC002546.1	-2.15661	2.65542	7.99952e-16	4.34449e-15
AC090125.1	3.45488	4.08595	8.10378e-16	4.39571e-15
AL139393.1	3.97816	3.79235	8.2028e-16	4.4467e-15
AL391361.3	5.2305	3.7504	8.41972e-16	4.55871e-15
AC025575.1	3.30458	3.14892	8.44301e-16	4.56852e-15
LINC02527	3.79183	4.99393	8.45521e-16	4.57232e-15
AC097059.1	-2.37719	2.63349	8.5819e-16	4.638e-15
TEX41	2.15099	8.08558	9.23208e-16	4.98634e-15
AC092484.1	5.32244	4.90573	1.04235e-15	5.61509e-15
AC021087.4	4.28718	4.52902	1.04279e-15	5.61509e-15
AC096751.2	-2.02748	3.27298	1.04752e-15	5.63711e-15
MGAT3-AS1	-2.07188	3.90725	1.14892e-15	6.17153e-15
LINC01629	4.4839	6.24745	1.19299e-15	6.40438e-15
AC083841.2	4.17709	3.3904	1.28244e-15	6.87623e-15
AL353747.3	-2.87578	3.47684	1.28621e-15	6.89224e-15
AC008011.2	2.94243	6.83728	1.36171e-15	7.2792e-15
AC123905.1	3.38291	3.33193	1.36596e-15	7.29747e-15
TLR8-AS1	-2.21862	3.46674	1.37769e-15	7.35569e-15
AC110285.6	2.26507	4.22482	1.51756e-15	8.05876e-15
AC068305.2	2.50493	5.27598	1.59738e-15	8.47751e-15
AC004920.1	3.82717	2.87036	1.63196e-15	8.65587e-15
AC009652.1	-2.03134	3.44696	1.65541e-15	8.77494e-15
AC021683.3	4.97027	5.88121	1.70099e-15	9.00041e-15
LINC02081	2.32949	6.908	1.77891e-15	9.40145e-15
AC022784.3	2.0692	5.7141	1.8233e-15	9.62457e-15
LINC00469	-2.04681	3.27482	1.90464e-15	1.00479e-14
LINC00391	3.70046	3.39426	2.10258e-15	1.10789e-14
AL133320.1	-2.68955	4.69537	2.14814e-15	1.13122e-14
AC025183.2	4.66444	3.20948	2.19509e-15	1.15389e-14
AL157931.1	3.1399	4.83664	2.28276e-15	1.19855e-14
AC090578.1	3.28885	3.69737	2.33085e-15	1.22307e-14
AC068473.3	3.17479	8.04247	2.51295e-15	1.31551e-14
AC061975.6	6.41432	5.44233	2.55468e-15	1.33656e-14
AC068580.2	3.6965	3.60674	2.59016e-15	1.35352e-14
AC123768.1	2.63523	2.88477	2.85352e-15	1.48851e-14
AC122694.1	4.84475	4.64463	3.162e-15	1.64458e-14
AL445673.1	2.25807	5.43145	3.27495e-15	1.70032e-14
LINC02086	3.07936	6.86658	3.76697e-15	1.95234e-14
AC105460.1	7.77647	8.78238	3.78795e-15	1.96206e-14
ZFHX4-AS1	5.23344	5.73016	3.8858e-15	2.01156e-14
LINC01583	3.11347	4.51898	3.91584e-15	2.02593e-14
AL512785.1	5.72611	5.46782	3.95368e-15	2.04193e-14
AL079307.1	3.63074	4.92432	4.09279e-15	2.11254e-14
ELFN1-AS1	3.7485	6.51088	4.16479e-15	2.1472e-14
AC005042.2	4.28741	3.3101	4.21985e-15	2.17431e-14
AL354861.3	-2.5575	3.29569	4.26563e-15	2.19663e-14
AC006206.1	3.26729	2.74327	4.28799e-15	2.20686e-14
LINC01419	9.25156	7.90085	4.33193e-15	2.22817e-14
AC022784.8	2.54047	3.89751	4.46372e-15	2.29463e-14
LINC02588	5.18782	5.22622	4.49893e-15	2.31138e-14
AC022079.1	2.78792	5.37858	4.51663e-15	2.31913e-14
AC018716.2	4.91733	5.12929	4.52976e-15	2.32452e-14
LINC00520	3.33304	7.19977	4.59238e-15	2.35529e-14
AC020551.1	5.81017	4.14574	4.7202e-15	2.41804e-14
LINC01571	-2.83998	3.91541	4.84821e-15	2.48218e-14
AL109976.1	2.07818	8.92572	5.05445e-15	2.58179e-14
AC104564.2	2.43376	3.56902	5.068e-15	2.58573e-14
CU634019.6	2.32468	3.49995	5.194e-15	2.64849e-14
AC112176.1	4.54413	4.52216	5.26126e-15	2.68124e-14
WASIR2	2.4765	5.024	5.27571e-15	2.68706e-14
AC053503.2	2.15972	4.36751	5.52438e-15	2.81048e-14
AL355303.1	2.67526	3.79722	5.73012e-15	2.91347e-14
KIAA0087	-2.18406	3.19834	5.9888e-15	3.04325e-14
LINC00518	4.98415	4.45573	6.52361e-15	3.30552e-14
STEAP3-AS1	2.11582	6.60805	6.65352e-15	3.36749e-14
AC023511.1	4.88583	3.61229	6.92718e-15	3.50198e-14
AC003986.2	2.64619	3.69446	7.1767e-15	3.62192e-14
AC132807.2	5.06471	5.23501	7.18895e-15	3.62603e-14
AC016723.1	5.49867	5.25024	7.21851e-15	3.63887e-14
LINC01297	5.97139	4.4343	7.32178e-15	3.68883e-14
AP000439.1	-2.07164	2.82534	7.52872e-15	3.78877e-14
AC109462.1	3.39206	3.99981	7.58841e-15	3.81664e-14
AC010997.5	2.09909	3.34343	7.62399e-15	3.83235e-14
LINC02437	4.66451	3.55766	7.67364e-15	3.85512e-14
AC023794.1	2.00492	5.15233	8.0565e-15	4.04287e-14
MIR548XHG	7.67938	6.44203	8.13947e-15	4.07988e-14
AC021785.1	3.95078	3.10177	9.08861e-15	4.5402e-14
AC007193.2	-2.06008	2.9031	9.51179e-15	4.74089e-14
AC018953.1	4.31317	3.00545	1.01412e-14	5.04892e-14
AC090912.3	3.09599	4.6517	1.0494e-14	5.21871e-14
AC009275.1	2.16187	6.38972	1.23581e-14	6.12506e-14
CLEC12A-AS1	3.15582	5.5299	1.2417e-14	6.14737e-14
AC011601.1	4.12423	3.67378	1.24577e-14	6.16403e-14
AL139246.4	2.88236	4.52841	1.30994e-14	6.47431e-14
AC108174.1	5.13193	4.42474	1.32472e-14	6.53279e-14
LINC00992	2.66246	6.96501	1.34589e-14	6.63349e-14
AL591501.1	4.32647	5.12924	1.43366e-14	7.05034e-14
AC124276.1	3.05846	4.22381	1.45511e-14	7.15185e-14
FMR1-AS1	2.13174	3.31627	1.63991e-14	8.05123e-14
AL162413.1	4.00172	5.57884	1.67668e-14	8.22717e-14
AC108472.1	-2.13814	2.62198	1.69513e-14	8.3131e-14
FAM181A-AS1	-2.11203	5.16965	1.75117e-14	8.57839e-14
AC010307.2	2.44507	4.39823	1.78536e-14	8.73622e-14
LINC00862	2.14449	4.74711	1.85982e-14	9.09556e-14
LINC02387	3.14846	4.29058	1.88942e-14	9.2352e-14
AC062015.1	6.14695	4.98271	2.08972e-14	1.01917e-13
LINC01994	4.1618	3.91469	2.18745e-14	1.06566e-13
AC022509.1	4.19593	4.79505	2.39621e-14	1.16416e-13
AL356479.1	3.68621	4.20317	2.44321e-14	1.18569e-13
AC016573.1	2.68219	2.91818	2.47613e-14	1.201e-13
AL035425.3	5.72057	9.62056	2.53611e-14	1.22875e-13
AC087258.1	5.23349	4.4685	2.592e-14	1.25445e-13
AC116666.1	4.79334	3.7537	2.61419e-14	1.2645e-13
AC007249.1	2.59253	5.96172	2.63969e-14	1.27614e-13
AC008083.1	3.58609	4.89004	2.866e-14	1.38479e-13
LINC01287	6.55088	8.44702	2.89954e-14	1.40023e-13
AL390729.1	2.89223	4.4993	2.94556e-14	1.42168e-13
AC005722.3	4.55462	5.4413	3.04089e-14	1.46609e-13
LINC01908	-2.31226	3.72228	3.18942e-14	1.53603e-13
LINC02393	6.26211	5.7861	3.45596e-14	1.66077e-13
AC126696.3	2.55524	3.48006	3.46186e-14	1.66271e-13
AC093390.1	-2.34614	3.16294	3.57166e-14	1.71359e-13
LINC00332	-2.57223	3.17548	3.74499e-14	1.79285e-13
AC090502.1	5.55827	5.83078	3.78998e-14	1.81341e-13
AC007405.2	3.39101	3.23454	4.23873e-14	2.01804e-13
AP003119.1	4.17911	5.94711	4.30127e-14	2.04588e-13
LINC01854	7.10071	5.79301	4.31753e-14	2.05141e-13
AC034154.1	4.37131	3.96865	4.36424e-14	2.07249e-13
AC005162.2	3.04301	3.94846	4.48056e-14	2.12658e-13
AC008109.1	5.25466	5.61495	4.57815e-14	2.17173e-13
AC008403.3	2.15608	3.82356	4.80548e-14	2.27835e-13
POU6F2-AS1	3.97193	2.8296	4.90312e-14	2.32216e-13
AC087612.1	6.5524	6.60595	4.98944e-14	2.36146e-13
LINC01639	5.69251	4.0806	4.99143e-14	2.36146e-13
AL109610.1	4.18781	2.94031	5.05597e-14	2.39071e-13
AL035425.1	4.35191	6.75068	5.24637e-14	2.47941e-13
AC024560.1	2.9985	4.96692	5.49751e-14	2.59198e-13
AL033527.2	2.76485	3.86826	5.4992e-14	2.59198e-13
AC008115.2	2.97878	2.86941	5.54231e-14	2.61091e-13
AL133370.1	6.1683	5.85316	5.62511e-14	2.64709e-13
LINC02197	-2.66133	2.98312	5.63498e-14	2.65033e-13
AC011287.2	3.43168	3.54779	5.64614e-14	2.65417e-13
LINC01896	6.95554	5.48976	6.30249e-14	2.95329e-13
AL591222.1	3.45789	4.34149	6.30594e-14	2.95334e-13
LINC01918	2.95838	3.79681	6.35946e-14	2.97683e-13
ESRG	7.05955	9.205	7.519e-14	3.51032e-13
LINC02377	7.43308	5.38313	7.52659e-14	3.51201e-13
AC090809.1	6.59587	4.87443	7.60718e-14	3.54774e-13
AC015712.6	2.27338	6.63992	7.69328e-14	3.58224e-13
LINC01214	4.37615	3.98597	7.74875e-14	3.60616e-13
AC105254.1	-2.29041	2.69481	7.81207e-14	3.63181e-13
AL021807.1	2.005	6.2669	7.97274e-14	3.70067e-13
AC022784.1	3.39245	6.214	8.03893e-14	3.72944e-13
AC068985.1	4.30047	3.37586	8.35345e-14	3.87332e-13
SAMD12-AS1	2.22623	6.86379	8.66722e-14	4.0125e-13
LINC00629	2.05706	4.02339	9.31975e-14	4.31233e-13
AC145207.8	2.49201	6.74644	9.65422e-14	4.46243e-13
LINC02535	3.19907	5.24229	1.03482e-13	4.76081e-13
OVOL1-AS1	2.3171	4.05615	1.09892e-13	5.04785e-13
AC009065.5	2.05163	5.95024	1.10627e-13	5.07632e-13
AL109761.1	2.44795	4.49199	1.1074e-13	5.0789e-13
TMEM132D-AS1	7.59715	6.54699	1.18578e-13	5.4271e-13
AC008443.3	3.27715	5.18921	1.22622e-13	5.60348e-13
RRM1-AS1	2.17411	2.77757	1.29362e-13	5.90538e-13
AF212831.1	3.4368	2.66998	1.31815e-13	6.01425e-13
FAM222A-AS1	2.3411	5.34944	1.32223e-13	6.02978e-13
AC112721.2	2.44296	4.45908	1.32368e-13	6.03328e-13
AC069120.1	4.27756	4.66994	1.37292e-13	6.24483e-13
LINC02444	4.25134	3.44149	1.37432e-13	6.24799e-13
AC044839.2	5.03409	3.66568	1.42627e-13	6.47418e-13
AC114316.2	2.90017	4.37183	1.45562e-13	6.60066e-13
MANCR	2.99128	6.93147	1.52319e-13	6.89644e-13
AC100781.1	-2.71003	2.55114	1.52903e-13	6.91936e-13
AC126768.3	3.5508	3.58839	1.53013e-13	6.92078e-13
AC026310.2	3.11997	4.51993	1.53939e-13	6.9577e-13
AP003900.1	6.12594	4.51367	1.53986e-13	6.9577e-13
AC092167.1	3.04499	3.46236	1.55723e-13	7.02899e-13
AP003469.1	2.56589	2.81978	1.6031e-13	7.22865e-13
LINC01093	-2.10441	3.10344	1.6143e-13	7.27547e-13
AL589740.1	4.16216	3.54298	1.67321e-13	7.53325e-13
EWSAT1	3.17141	6.9625	1.70562e-13	7.6753e-13
LHX1-DT	6.11335	5.14196	1.72194e-13	7.74479e-13
AL139246.1	2.64418	4.49492	1.73596e-13	7.7999e-13
AL596330.1	4.48695	4.76922	1.84732e-13	8.28345e-13
AC113194.1	3.55872	3.28931	1.90695e-13	8.54531e-13
AP003390.2	2.73086	3.06333	1.93094e-13	8.64527e-13
LINC01549	4.78295	4.83467	1.9894e-13	8.90251e-13
AL121761.2	2.48543	7.37108	1.99707e-13	8.93232e-13
BX324167.1	2.72014	4.13253	2.07402e-13	9.2624e-13
GRM5-AS1	3.69065	3.63616	2.08511e-13	9.30727e-13
AL589743.5	2.89176	3.5507	2.09713e-13	9.35618e-13
MIAT	2.20242	11.8734	2.36379e-13	1.0493e-12
FGF10-AS1	-2.43871	3.00787	2.63393e-13	1.1657e-12
LINC02404	7.38815	6.14379	2.73334e-13	1.20909e-12
AC112907.1	3.56992	3.21129	2.79282e-13	1.23355e-12
AC011700.1	3.53563	4.349	2.81849e-13	1.24427e-12
AC009955.1	2.96059	2.72256	2.89425e-13	1.27708e-12
LINC00165	-2.60688	3.85282	3.06099e-13	1.34796e-12
LINC02068	2.24553	6.0568	3.20823e-13	1.4121e-12
LINC02254	3.07883	3.67354	3.35924e-13	1.47636e-12
LINC02031	3.69753	6.6934	3.3983e-13	1.49205e-12
UNC5B-AS1	2.00671	6.71654	3.45162e-13	1.51396e-12
LINC00557	3.93606	3.69442	3.52281e-13	1.54365e-12
AC079943.2	3.99486	2.84155	3.68058e-13	1.61039e-12
AC078906.1	2.2869	3.83479	3.73695e-13	1.63344e-12
AC006450.3	4.54768	3.37949	4.17896e-13	1.82304e-12
AC011298.1	4.87509	4.65748	4.55904e-13	1.98395e-12
SAMMSON	2.91423	3.64624	4.74332e-13	2.06111e-12
LINC02208	3.52186	4.02288	4.86278e-13	2.10991e-12
AL359851.1	3.14434	3.01957	4.99125e-13	2.16247e-12
AL391704.1	4.11014	3.52408	5.20771e-13	2.25184e-12
AC090503.2	4.01856	3.07679	5.33458e-13	2.30332e-12
LINC01448	4.86638	3.4726	5.40042e-13	2.33061e-12
AC104051.2	-2.04969	2.83125	5.49186e-13	2.36892e-12
AC007540.1	3.06385	2.57983	5.56506e-13	2.39932e-12
LINC01127	3.46816	9.14957	5.69048e-13	2.44981e-12
AC093515.1	5.08844	4.41398	5.75729e-13	2.47617e-12
LINC00501	4.46987	5.16637	5.83004e-13	2.50502e-12
AL590491.2	-2.6561	3.25443	6.58122e-13	2.81957e-12
LINC00707	3.01986	6.72538	6.94676e-13	2.96755e-12
AF121898.1	3.99115	3.04986	7.00028e-13	2.98897e-12
AL157714.2	-2.10195	3.7	7.06221e-13	3.01396e-12
AL590666.3	2.67742	3.1174	7.11468e-13	3.03489e-12
AC089983.1	3.43525	6.08534	7.272e-13	3.1005e-12
AC084819.1	4.46166	4.18005	7.64034e-13	3.25284e-12
AC092920.1	3.14684	3.25465	7.82677e-13	3.32901e-12
AC019068.1	3.82505	2.94048	8.02914e-13	3.41345e-12
LINC02313	3.25164	3.75739	8.09992e-13	3.43919e-12
LINC00601	3.96052	4.1116	8.10135e-13	3.43919e-12
AC093904.3	3.76761	3.53137	8.30682e-13	3.52472e-12
AC106771.1	6.14529	4.84814	8.5873e-13	3.64199e-12
AC122710.2	2.44575	3.9113	8.64985e-13	3.665e-12
LINC01356	2.5482	5.26588	8.76124e-13	3.70865e-12
LINC00504	2.71692	8.56145	9.7672e-13	4.12264e-12
AC005329.1	2.30063	4.69164	1.04318e-12	4.38849e-12
LINC00974	3.1025	3.03666	1.07381e-12	4.51304e-12
AC097512.1	5.56894	4.46712	1.14612e-12	4.81241e-12
LINC02454	3.28242	5.26664	1.16989e-12	4.90986e-12
AC116025.2	2.35002	3.38527	1.32922e-12	5.56011e-12
LINC01587	2.99391	4.87879	1.46478e-12	6.11847e-12
AC004053.1	2.3886	3.25979	1.53528e-12	6.40088e-12
TLX1NB	5.05354	3.72839	1.56741e-12	6.52252e-12
AC013652.2	2.41461	2.69847	1.5909e-12	6.61717e-12
AL133467.4	4.58687	4.63217	1.69718e-12	7.03935e-12
AL118508.1	3.31449	8.28303	1.71004e-12	7.08937e-12
AC022274.1	2.42121	2.7727	1.71588e-12	7.11025e-12
AC010501.1	2.04293	4.28859	1.74222e-12	7.21601e-12
AL133467.2	4.48197	5.27659	1.81031e-12	7.48753e-12
CHODL-AS1	3.24285	2.98795	1.82792e-12	7.55331e-12
AC084149.1	4.02993	3.00332	1.92968e-12	7.9552e-12
LINC01269	2.57401	6.10728	1.97416e-12	8.11966e-12
AL512604.2	2.45047	3.21856	2.12987e-12	8.75602e-12
AC020934.1	3.45227	2.74093	2.21582e-12	9.09668e-12
AC106785.2	5.23966	3.98427	2.26208e-12	9.27799e-12
CDKN2A-DT	3.15353	3.99132	2.2824e-12	9.35698e-12
LINC01979	2.50834	5.57173	2.46796e-12	1.0085e-11
AL133372.2	3.86166	3.40287	2.49167e-12	1.01725e-11
AC010789.1	4.83999	4.44794	2.49634e-12	1.01868e-11
AC244100.3	-2.36454	2.601	2.49916e-12	1.01937e-11
SPATA3-AS1	2.23441	3.98118	2.64155e-12	1.07645e-11
AC020928.2	2.72371	5.64437	2.67445e-12	1.08886e-11
AL138900.3	-2.2033	5.03394	2.82109e-12	1.14565e-11
AL122019.1	3.77559	4.10384	2.8217e-12	1.14565e-11
AC008464.1	4.99602	4.1176	2.823e-12	1.14565e-11
AC055758.1	5.01141	3.57089	2.88053e-12	1.16792e-11
AF233439.1	2.55216	4.31912	3.00234e-12	1.21508e-11
AC016877.3	2.16414	4.43698	3.00844e-12	1.21699e-11
AL161908.1	3.85876	3.95861	3.08175e-12	1.24494e-11
FAM230C	6.70017	5.04966	3.20132e-12	1.29148e-11
AC010099.4	2.85106	3.69358	3.20593e-12	1.29275e-11
AL355482.2	2.00116	4.50575	3.29898e-12	1.32905e-11
LINC01964	4.62157	4.41034	3.5922e-12	1.4439e-11
AC084211.1	3.41907	2.65064	3.63808e-12	1.46044e-11
OTX2-AS1	3.94881	4.39923	3.85325e-12	1.54322e-11
AC023824.3	5.74279	4.70334	3.88606e-12	1.55495e-11
AC117386.2	4.21046	4.35253	3.91721e-12	1.56671e-11
AC019080.3	2.12672	5.3737	3.92544e-12	1.56929e-11
AC243967.2	-2.00589	4.14418	4.25432e-12	1.6977e-11
TCF4-AS1	3.15184	4.94321	4.25836e-12	1.69854e-11
AC067956.1	2.23583	3.36471	4.47333e-12	1.78188e-11
LINC01995	4.17776	4.27779	4.5061e-12	1.79332e-11
AL645608.7	2.28721	4.0038	4.51631e-12	1.79657e-11
AC005291.1	3.21292	4.19789	4.53962e-12	1.80423e-11
AC069061.2	6.37762	4.57517	4.66444e-12	1.85217e-11
AC078923.1	2.86818	5.55081	4.72131e-12	1.87139e-11
AC018716.1	4.41327	3.51545	5.1212e-12	2.02717e-11
AC055758.2	4.90407	3.75558	5.36242e-12	2.11792e-11
AC013546.1	-2.05953	2.53271	5.5176e-12	2.17338e-11
BX005040.1	-2.52457	3.01344	5.76799e-12	2.26696e-11
AC019197.1	2.91195	7.5598	5.78763e-12	2.27267e-11
AP000851.1	4.2684	6.14054	6.04459e-12	2.37252e-11
LIVAR	2.65605	4.52486	6.19526e-12	2.4295e-11
TDRG1	5.38179	4.48715	7.08716e-12	2.77312e-11
LINC02128	3.69206	3.94788	7.17978e-12	2.80811e-11
MYHAS	2.08184	4.28042	7.55775e-12	2.95333e-11
LINC00659	3.22089	4.54443	8.22782e-12	3.2095e-11
LINC00302	4.66571	3.19373	8.31391e-12	3.24166e-11
LINC01250	3.2954	3.58364	8.5938e-12	3.34931e-11
AL359771.1	4.2819	4.67914	8.6805e-12	3.38161e-11
AC004704.1	4.95274	4.963	9.49923e-12	3.69405e-11
LINC01687	5.41855	3.87058	9.93605e-12	3.85714e-11
AP001360.1	5.08685	3.81858	9.942e-12	3.85776e-11
AL162384.1	3.20622	2.58902	1.01297e-11	3.92544e-11
AC010271.2	2.24263	3.26564	1.01357e-11	3.92602e-11
AL121827.2	2.58667	6.26754	1.03623e-11	4.0103e-11
KCNIP4-IT1	3.72338	2.81229	1.05028e-11	4.06288e-11
AP000424.1	2.90317	3.96759	1.06134e-11	4.1039e-11
AL031674.1	3.12007	3.31878	1.12546e-11	4.34231e-11
AC008114.1	2.10182	3.27753	1.16177e-11	4.47462e-11
AC090371.2	2.99333	2.89136	1.2292e-11	4.72199e-11
AJ003147.2	3.5801	2.97226	1.30577e-11	5.00526e-11
AL109924.2	2.6769	3.31374	1.33668e-11	5.11931e-11
AC115837.2	3.1978	2.69805	1.35555e-11	5.18934e-11
AC209154.2	6.55546	5.32159	1.36567e-11	5.2258e-11
AL160408.1	2.38039	5.52622	1.40102e-11	5.35643e-11
LINC01494	2.78	2.74169	1.41713e-11	5.41571e-11
LINC00051	4.64813	4.31483	1.45963e-11	5.57332e-11
LINC00525	2.18762	5.33149	1.57464e-11	5.9995e-11
AL355483.3	2.46069	2.86848	1.64266e-11	6.25328e-11
AC003985.2	-2.41488	3.84761	1.67569e-11	6.37351e-11
AL121578.3	4.49445	3.35457	1.6821e-11	6.39515e-11
SSTR5-AS1	4.10457	5.1456	1.6992e-11	6.45463e-11
AC006357.1	4.36135	3.64703	1.73163e-11	6.56653e-11
AC100839.2	4.45591	3.75556	1.75696e-11	6.65688e-11
AL139424.1	2.07451	2.89768	1.79014e-11	6.77388e-11
LINC01910	2.94989	3.81521	1.84033e-11	6.95192e-11
AC122134.1	4.41349	3.42807	1.93401e-11	7.29647e-11
AC009061.1	2.3376	2.64371	1.98955e-11	7.49961e-11
AL049874.3	3.65971	4.17545	2.03361e-11	7.66241e-11
TTTY16	-2.23865	3.29357	2.035e-11	7.66439e-11
AL445647.1	5.39747	3.96903	2.06443e-11	7.76201e-11
AP001025.1	3.48667	5.22818	2.11817e-11	7.96068e-11
AL132655.1	2.58888	3.91991	2.22863e-11	8.35808e-11
OSTM1-AS1	4.59678	3.8882	2.30815e-11	8.64897e-11
LINC01224	3.37306	8.20844	2.3383e-11	8.75825e-11
AL606970.1	3.95229	4.54428	2.45416e-11	9.16889e-11
LINC01491	4.42726	3.28385	2.4775e-11	9.2522e-11
LINC02475	3.45462	5.50271	2.58882e-11	9.65976e-11
C15orf59-AS1	3.39078	5.29697	2.60174e-11	9.70387e-11
LINC01192	4.19751	3.47367	2.7015e-11	1.0059e-10
AC099796.1	3.5269	3.93393	3.18439e-11	1.18024e-10
LINC02167	7.96258	6.51967	3.30703e-11	1.22415e-10
AC093627.1	4.15119	3.58397	3.36235e-11	1.24411e-10
LINC02476	6.18659	4.70113	3.42631e-11	1.26672e-10
LINC02269	3.52856	3.23777	3.42984e-11	1.26749e-10
AC004158.1	4.34452	4.34672	3.47731e-11	1.28343e-10
LINC02348	2.36511	2.87481	3.51908e-11	1.29776e-10
AC027627.1	2.40238	2.66857	3.59996e-11	1.32704e-10
AF279873.3	6.32234	5.62667	3.60447e-11	1.32759e-10
AL022316.1	2.16526	5.22408	3.65889e-11	1.34707e-10
AF015262.1	3.41179	3.23986	3.73568e-11	1.37477e-10
AC022405.1	2.16686	2.62467	3.8745e-11	1.42468e-10
LINC01546	2.29983	4.48889	3.92812e-11	1.44319e-10
AC096719.1	2.84201	4.51612	4.14179e-11	1.52043e-10
FER1L6-AS2	5.35665	4.63332	4.17785e-11	1.53303e-10
LINC00701	3.60807	2.77272	4.23802e-11	1.55447e-10
AC008750.3	2.5579	3.34599	4.28861e-11	1.57184e-10
AL157373.2	2.05888	5.5983	4.28894e-11	1.57184e-10
AC084024.3	2.57435	3.80884	4.35096e-11	1.5928e-10
MYCNOS	3.68595	4.7392	4.35496e-11	1.5934e-10
AL713965.1	-2.01622	3.2608	4.54852e-11	1.66284e-10
LINC00113	-2.19267	2.7607	4.58733e-11	1.67634e-10
AL021395.1	5.03335	5.81677	4.68198e-11	1.70881e-10
LINC01213	3.3746	3.86614	4.79157e-11	1.74808e-10
AL160412.1	3.51718	3.6675	4.86357e-11	1.77143e-10
AL513304.1	6.90881	5.21643	5.09798e-11	1.85528e-10
AC023796.1	-2.2401	2.85747	5.64054e-11	2.04684e-10
AC098936.1	2.93875	4.20542	5.89572e-11	2.13506e-10
LINC02522	3.57192	3.07313	6.0389e-11	2.18512e-10
AC092130.1	3.41995	2.58684	6.16284e-11	2.22906e-10
AL391097.2	2.3049	2.84563	6.25806e-11	2.26257e-10
LINC01370	7.52303	6.05728	6.28861e-11	2.27268e-10
Z99943.1	2.24334	4.59756	6.36494e-11	2.29745e-10
ERVMER61-1	5.90885	4.24763	6.5162e-11	2.35086e-10
AC109479.1	2.18763	3.47989	6.57069e-11	2.36882e-10
AC018695.2	2.09654	2.70891	6.89906e-11	2.48215e-10
LINC01616	-2.67906	3.16586	6.98269e-11	2.51019e-10
AC244230.1	2.44471	3.74017	7.21445e-11	2.59035e-10
AC100801.1	6.16346	6.02148	7.25648e-11	2.60333e-10
LINC02111	3.41223	3.24259	7.94528e-11	2.83778e-10
LINC02502	2.71764	3.58	9.08224e-11	3.23082e-10
AC096669.1	4.29002	3.00971	9.37349e-11	3.32907e-10
AC087318.1	2.43268	2.74994	9.42948e-11	3.34627e-10
AC105999.2	8.78031	7.19668	9.467e-11	3.35689e-10
AC087473.1	3.03898	3.18334	9.57638e-11	3.39296e-10
AC022762.1	2.49821	3.61319	9.95248e-11	3.52058e-10
LINC01511	4.97327	5.82263	1.06895e-10	3.77376e-10
AP001547.1	4.26584	3.95032	1.09326e-10	3.85647e-10
AP000851.2	4.00702	5.54178	1.10377e-10	3.89047e-10
LINC02223	3.5132	4.04889	1.10951e-10	3.90913e-10
LINC01920	3.57553	2.89453	1.15353e-10	4.05937e-10
AC023158.2	3.70003	3.04973	1.17225e-10	4.12033e-10
U95743.1	4.31947	3.14641	1.17833e-10	4.13844e-10
AL122034.1	3.4848	3.30986	1.20745e-10	4.23565e-10
AC007277.1	-2.01949	4.7162	1.23944e-10	4.34098e-10
AC008278.1	3.67261	3.38976	1.26189e-10	4.41437e-10
AL606970.4	4.12446	4.41645	1.26257e-10	4.415e-10
AC068134.2	-2.00864	2.7836	1.28606e-10	4.49181e-10
AC080129.1	4.06989	3.61394	1.29867e-10	4.53405e-10
AL109954.2	2.81949	3.09054	1.3233e-10	4.61825e-10
AC073957.1	3.49598	4.3885	1.34633e-10	4.69492e-10
AL451062.1	3.57945	4.86006	1.35968e-10	4.73773e-10
AL354824.2	3.16826	3.04235	1.39618e-10	4.85726e-10
FOXCUT	2.36242	4.41942	1.42024e-10	4.93708e-10
AJ003147.1	3.50705	2.97494	1.42951e-10	4.96735e-10
LINC02582	6.10719	7.01398	1.46962e-10	5.10072e-10
AP001783.1	3.24685	4.63637	1.4923e-10	5.17539e-10
AC003001.1	2.75121	2.62653	1.49721e-10	5.19038e-10
AP000842.3	2.26135	3.39566	1.50237e-10	5.2062e-10
AL122008.3	2.61472	4.5288	1.51034e-10	5.22985e-10
AC092916.1	6.64092	4.87296	1.52578e-10	5.28114e-10
Z97206.2	3.00241	3.01866	1.5741e-10	5.44201e-10
LNX1-AS1	3.18111	2.9265	1.73945e-10	5.99512e-10
LINC02306	3.52238	2.62966	1.80011e-10	6.19672e-10
AC010967.1	4.27513	3.19594	1.81969e-10	6.25926e-10
AL162574.2	3.15109	5.08886	1.82518e-10	6.27569e-10
AL590004.3	-2.15232	2.55559	1.86518e-10	6.40825e-10
AC023824.1	6.80337	5.04557	1.9408e-10	6.65515e-10
AL356310.1	-2.05479	2.906	1.98353e-10	6.79639e-10
SCHLAP1	5.8986	4.23235	2.00198e-10	6.85695e-10
AC091170.1	4.20328	4.47954	2.04303e-10	6.98944e-10
AL132655.2	2.09251	4.16711	2.08016e-10	7.11372e-10
AC006487.1	2.2993	3.77323	2.08592e-10	7.13066e-10
AL161636.1	3.66877	4.57709	2.08695e-10	7.1314e-10
LINC01143	3.08347	4.26585	2.13642e-10	7.2836e-10
AC023886.1	3.70832	3.15013	2.16444e-10	7.37342e-10
AC004888.1	2.87976	2.90697	2.27678e-10	7.73527e-10
AP005328.2	2.60801	3.76174	2.42294e-10	8.2035e-10
MIR5689HG	2.76595	2.85651	2.4343e-10	8.23883e-10
LINC02267	6.49723	5.11524	2.6835e-10	9.06142e-10
AL391069.4	2.15033	2.71575	2.73003e-10	9.21501e-10
AC078842.1	3.18467	2.64587	2.9761e-10	1.0015e-09
LINC02551	2.41668	5.21834	3.03686e-10	1.02079e-09
AC007221.1	-2.21731	2.60172	3.05663e-10	1.02704e-09
AL161757.5	3.69673	3.21173	3.09121e-10	1.03787e-09
RBAKDN	2.80079	4.4131	3.09888e-10	1.04005e-09
AC021534.1	4.94687	3.66351	3.11666e-10	1.04562e-09
B3GALT5-AS1	3.10512	6.34757	3.13535e-10	1.05149e-09
LINC01405	3.66088	3.38108	3.16855e-10	1.06223e-09
LINC01344	2.32683	4.15323	3.25169e-10	1.08969e-09
AC009139.1	3.33838	3.75681	3.31217e-10	1.10911e-09
LINC00381	2.62776	3.41441	3.36897e-10	1.12685e-09
H19	3.32737	14.0299	3.51076e-10	1.17295e-09
AC010745.2	4.12282	3.02317	3.56708e-10	1.19087e-09
AL645608.9	2.17752	4.47127	3.63693e-10	1.21327e-09
AC083809.1	2.89793	5.99993	3.64506e-10	1.21552e-09
AC087894.2	4.247	3.13969	3.72985e-10	1.24286e-09
LINC02071	2.6795	2.61694	3.75237e-10	1.24942e-09
AC092125.1	2.61298	2.5887	3.80811e-10	1.26703e-09
AL049775.2	3.21607	3.2733	3.81097e-10	1.26751e-09
AC092811.1	2.63158	5.40402	3.97487e-10	1.32003e-09
AC012363.1	4.74188	3.69101	4.27058e-10	1.41505e-09
LINC01120	2.83148	2.56684	4.28706e-10	1.41998e-09
DDR1-DT	2.11726	3.2181	4.31161e-10	1.42638e-09
AC099509.2	2.85386	2.82315	4.61619e-10	1.52159e-09
LINC02505	4.76797	3.99881	4.73197e-10	1.55743e-09
LINC00698	2.52744	3.17021	4.86312e-10	1.59881e-09
AL353747.2	-2.31263	2.76144	4.9051e-10	1.61201e-09
AC007250.1	2.4116	2.65293	5.20726e-10	1.70751e-09
AC006946.2	2.21151	6.32037	5.41827e-10	1.77276e-09
AC024592.2	2.09636	5.06331	5.47588e-10	1.79095e-09
AC007907.1	2.75221	3.15023	5.50403e-10	1.79949e-09
AL356270.1	2.15622	3.68231	5.67702e-10	1.85399e-09
AC104564.4	2.57525	2.71711	5.73698e-10	1.87288e-09
LINC02492	5.93786	4.09889	5.82778e-10	1.90112e-09
AC004990.1	2.46338	7.48733	6.02204e-10	1.96232e-09
AC017048.3	2.55534	3.79965	6.02768e-10	1.96343e-09
CYYR1-AS1	2.24593	4.58485	6.16473e-10	2.00439e-09
AF130359.1	2.88536	2.9124	6.27346e-10	2.03675e-09
LINC00319	2.54392	3.01747	6.34318e-10	2.05863e-09
AC093843.1	2.77822	2.87608	6.41642e-10	2.07978e-09
AC125494.3	2.38898	2.64953	6.41776e-10	2.07978e-09
AP005137.2	3.0046	3.23853	6.6407e-10	2.14966e-09
LINC01543	3.28186	3.54775	6.67459e-10	2.15984e-09
CLSTN2-AS1	2.42998	3.15215	6.81588e-10	2.20314e-09
LINC01205	4.93982	4.14523	7.67766e-10	2.47087e-09
AL512622.1	2.37137	3.55562	7.8786e-10	2.53278e-09
AC044839.4	4.6436	3.35127	8.22208e-10	2.63936e-09
AC087491.1	2.26573	6.72728	8.30655e-10	2.66454e-09
LINC00460	2.86461	7.04829	8.51112e-10	2.72917e-09
AC091133.2	4.34415	3.25038	8.68268e-10	2.78116e-09
AL136298.1	3.04494	3.40049	9.10763e-10	2.91201e-09
ATP13A5-AS1	3.00649	2.90554	9.82725e-10	3.13191e-09
AC018685.2	3.54352	2.95402	9.83665e-10	3.13377e-09
AC008060.1	4.54329	3.61451	9.99726e-10	3.18185e-09
AL161757.4	3.2116	2.60111	1.01861e-09	3.2381e-09
AC244502.3	2.4848	3.81444	1.07112e-09	3.39893e-09
AC106875.1	5.33575	5.84299	1.0859e-09	3.4446e-09
AC100791.1	2.96405	2.62123	1.08873e-09	3.45233e-09
AL138962.1	2.6834	3.3262	1.21364e-09	3.83057e-09
LINC00648	3.29225	7.28499	1.23668e-09	3.8991e-09
AC018558.1	4.67053	3.21683	1.24905e-09	3.93671e-09
AL157778.1	5.66262	4.3936	1.31269e-09	4.12994e-09
AC138761.3	6.48338	5.33347	1.31958e-09	4.15013e-09
AC004080.4	2.1453	2.89328	1.35994e-09	4.27402e-09
AL596223.1	3.79526	4.91377	1.36407e-09	4.28548e-09
AC069439.2	3.62723	4.51047	1.43551e-09	4.49714e-09
AL138759.1	2.06536	2.69642	1.44724e-09	4.5323e-09
AC114912.1	3.98486	2.91275	1.54378e-09	4.81929e-09
AC027088.2	3.74353	3.10314	1.56229e-09	4.87533e-09
AL354864.1	2.70582	2.84671	1.59531e-09	4.97486e-09
AC011369.1	2.77063	2.70003	1.60226e-09	4.99477e-09
LINC02301	4.25937	4.8088	1.6376e-09	5.10315e-09
LINC00682	5.10798	3.76149	1.6773e-09	5.21952e-09
AP003500.1	2.73465	3.82128	1.71289e-09	5.32838e-09
AC012354.1	3.06194	4.0064	1.72566e-09	5.36623e-09
TBX18-AS1	2.62134	3.39122	1.76485e-09	5.48038e-09
AC003092.1	4.06112	4.80166	1.77086e-09	5.49711e-09
AC073323.1	3.35666	3.71277	1.77155e-09	5.49734e-09
LINC01475	3.73965	3.67279	1.80165e-09	5.58682e-09
AC138356.3	3.70307	3.43782	1.8267e-09	5.65655e-09
AC008060.4	5.17108	3.67852	2.0024e-09	6.17685e-09
LINC00556	2.8395	2.8277	2.02673e-09	6.24756e-09
LINC02484	5.93209	4.19019	2.05158e-09	6.32196e-09
AC022140.1	3.23415	2.60141	2.05899e-09	6.34258e-09
LINC01139	2.81047	8.58785	2.08567e-09	6.42029e-09
DSCR8	6.98355	6.26388	2.17944e-09	6.69962e-09
MTUS2-AS1	2.06702	3.56916	2.28303e-09	7.01074e-09
LINC02225	2.66462	2.5444	2.28566e-09	7.01639e-09
AL356277.3	3.24446	3.61153	2.32396e-09	7.12901e-09
AC010395.1	2.01062	3.42069	2.35312e-09	7.21597e-09
CACNA2D3-AS1	2.51058	3.54159	2.36544e-09	7.25122e-09
LINC00308	4.0614	2.87977	2.36735e-09	7.25458e-09
LINC01850	3.06261	2.98077	2.37439e-09	7.27361e-09
AL161645.1	2.38176	4.22312	2.39428e-09	7.32949e-09
AC090192.2	2.92782	3.75067	2.43443e-09	7.44467e-09
AC008517.1	5.28363	3.95418	2.75942e-09	8.40654e-09
LINC01667	5.86192	5.96228	2.79259e-09	8.50466e-09
PLUT	3.99982	2.92354	2.86147e-09	8.70543e-09
AC090023.2	3.96116	3.04215	2.87914e-09	8.75617e-09
AP005203.1	2.80151	3.30626	2.88361e-09	8.76676e-09
LINC02293	3.80887	3.12357	2.94856e-09	8.955e-09
AC092803.1	2.81364	3.22932	2.96237e-09	8.99385e-09
AL079301.1	3.15616	2.84803	2.98054e-09	9.04591e-09
LINC01162	3.98434	2.90987	3.1955e-09	9.67178e-09
AC139718.1	3.81047	3.10348	3.28177e-09	9.91593e-09
AC019185.2	2.86763	2.8148	3.28988e-09	9.93702e-09
LHX5-AS1	3.37844	2.67291	3.2993e-09	9.96208e-09
LINC00383	5.5909	3.93386	3.35602e-09	1.01299e-08
LINC01929	2.13913	7.3286	3.49823e-09	1.05304e-08
PCAT5	3.13661	3.3196	3.51904e-09	1.05822e-08
AC092957.1	4.60001	3.3005	3.56137e-09	1.07023e-08
AC091946.1	3.78887	4.47809	3.58191e-09	1.07603e-08
LINC00705	2.37657	3.72589	3.59426e-09	1.07938e-08
AC129926.1	2.07029	4.60964	3.61905e-09	1.08645e-08
AP001574.1	2.00432	5.12923	3.64353e-09	1.09343e-08
AL157414.1	3.38588	3.05213	3.69276e-09	1.10708e-08
AC074389.2	4.86508	5.08169	3.72696e-09	1.11657e-08
PAUPAR	3.45272	2.6062	3.84815e-09	1.15093e-08
AC013509.1	4.21331	2.96508	3.95347e-09	1.18163e-08
AC011611.2	3.36743	2.73271	4.15782e-09	1.24103e-08
AC125603.4	2.58201	3.96544	4.21914e-09	1.25806e-08
AC022387.1	2.91941	3.28224	4.22128e-09	1.25828e-08
LINC01254	3.40954	4.02711	4.29646e-09	1.27982e-08
AC012355.1	5.20203	3.56305	4.49004e-09	1.33479e-08
LINC01289	2.83777	2.54925	4.68334e-09	1.39021e-08
LINC02525	6.11137	5.4161	4.75714e-09	1.41088e-08
AC016550.2	4.17251	2.92848	4.79902e-09	1.42282e-08
SLC7A11-AS1	2.2975	6.44995	4.90846e-09	1.45235e-08
LINC01470	2.75524	2.88043	5.18399e-09	1.5308e-08
AL035252.2	2.8535	4.12802	5.19755e-09	1.53429e-08
CR392039.3	3.80612	3.50068	5.44059e-09	1.60176e-08
AL162411.1	2.34261	4.79412	5.48215e-09	1.61346e-08
FGF12-AS3	2.7055	3.22403	5.88381e-09	1.7288e-08
LINC01608	5.95398	4.21706	5.93621e-09	1.74361e-08
AL592486.1	5.25153	3.60367	5.9489e-09	1.74676e-08
AC096543.2	2.68262	2.56289	6.00415e-09	1.76123e-08
MYCNUT	4.7064	3.37715	6.27864e-09	1.83688e-08
LINC01160	2.08353	6.87664	6.45729e-09	1.88852e-08
ADARB2-AS1	2.68602	4.29147	6.49895e-09	1.89944e-08
LINC02005	3.02688	4.28973	6.85613e-09	1.99922e-08
AC109588.1	5.33197	3.96222	7.1679e-09	2.08669e-08
AC007923.1	3.5471	2.64661	7.30698e-09	2.12648e-08
AC091987.1	4.48939	3.5194	7.53827e-09	2.19162e-08
AL356010.2	3.30629	2.63428	7.56565e-09	2.19886e-08
LINC02105	2.95216	2.93117	7.60689e-09	2.20939e-08
AL355607.1	2.27468	4.55685	7.62446e-09	2.21377e-08
AC015522.1	4.66413	3.65003	7.73526e-09	2.24447e-08
AC022929.2	2.17781	3.15822	8.07986e-09	2.34062e-08
EGLN3-AS1	3.36595	2.90898	8.73999e-09	2.52441e-08
AC122710.1	4.57937	3.45772	8.94581e-09	2.58302e-08
AL136088.1	3.23324	4.03059	9.29155e-09	2.67935e-08
AL136537.2	5.56832	5.11264	9.51542e-09	2.74122e-08
AC114485.1	5.03611	3.43822	9.70864e-09	2.79416e-08
AF106564.1	3.48396	5.26202	1.00926e-08	2.90089e-08
AP003063.2	2.94302	2.9657	1.01852e-08	2.92654e-08
AL391097.1	2.20407	2.58356	1.11739e-08	3.20544e-08
LINC02448	3.79127	2.91864	1.1285e-08	3.23519e-08
AL513283.1	3.60153	5.67902	1.13066e-08	3.24033e-08
AC005064.1	2.90431	5.97683	1.1328e-08	3.24543e-08
AC108025.2	3.62815	3.0207	1.13721e-08	3.25701e-08
AL731684.1	2.24734	2.95374	1.17749e-08	3.36582e-08
BCAR4	4.29606	4.52659	1.18296e-08	3.38037e-08
LINC01098	2.96385	3.21346	1.1956e-08	3.41429e-08
AC078820.1	2.28242	4.37029	1.21653e-08	3.47183e-08
AL512488.1	2.26047	7.30867	1.22398e-08	3.49083e-08
LINC02048	2.33946	3.28745	1.24636e-08	3.55122e-08
AC090116.1	3.6188	3.33798	1.25579e-08	3.57694e-08
AC004875.1	3.72517	2.72355	1.29254e-08	3.67805e-08
AL662890.1	2.03461	3.93354	1.3068e-08	3.71745e-08
AC108865.1	4.01897	4.54051	1.32654e-08	3.77238e-08
C3orf67-AS1	2.57189	2.50753	1.34075e-08	3.81157e-08
FGF12-AS2	2.4016	3.73666	1.35686e-08	3.85613e-08
BLACE	2.10668	2.55489	1.38326e-08	3.92738e-08
AP003500.2	2.62556	2.95957	1.41699e-08	4.01926e-08
LINC00973	3.80879	5.18168	1.70573e-08	4.81052e-08
AL135924.2	2.67389	2.65498	1.7092e-08	4.8185e-08
LINC01193	5.60002	4.0593	1.73145e-08	4.87685e-08
LINC02170	2.10817	5.26012	1.74436e-08	4.91008e-08
AC068633.1	3.90987	3.66144	1.77231e-08	4.98604e-08
AC011483.1	2.86379	3.00214	1.77247e-08	4.98604e-08
AC109830.1	5.11017	3.49013	1.77971e-08	5.00322e-08
AC104071.1	6.1356	5.83273	1.78062e-08	5.00416e-08
LINC01343	3.5405	3.51082	1.88136e-08	5.27891e-08
ELOVL2-AS1	2.76878	3.36489	1.89818e-08	5.32441e-08
AL358613.2	2.4558	3.23776	1.95443e-08	5.47351e-08
AC020611.2	2.04159	2.58412	1.97629e-08	5.53125e-08
AC128709.1	2.15892	6.17947	2.01495e-08	5.63054e-08
AC000032.1	3.85733	3.81923	2.10437e-08	5.87669e-08
AC003986.3	2.56737	2.77961	2.10757e-08	5.88377e-08
LINC01792	2.63274	3.24986	2.29343e-08	6.39056e-08
LINC01666	2.81411	3.70057	2.29719e-08	6.39899e-08
AC112493.1	2.93045	3.92732	2.31033e-08	6.43358e-08
AC138965.1	3.57624	2.73534	2.38452e-08	6.62766e-08
AC092818.1	2.31845	3.37097	2.38697e-08	6.63239e-08
AP005229.2	4.0081	3.82661	2.40903e-08	6.68737e-08
AC109439.2	3.92559	3.75592	2.47845e-08	6.8693e-08
LINC02382	3.57805	3.64146	2.54756e-08	7.05423e-08
AC131902.1	3.42717	4.82923	2.56486e-08	7.09902e-08
MIR3681HG	2.15933	4.92682	2.58061e-08	7.13904e-08
AC103409.1	4.14347	4.07288	2.6452e-08	7.30403e-08
LINC01087	3.58203	4.22237	2.65006e-08	7.31515e-08
LINC02477	2.75209	3.48183	2.6631e-08	7.34199e-08
LINC01887	2.11653	3.2906	2.89464e-08	7.95061e-08
AC093274.1	2.44601	2.96539	2.96121e-08	8.1284e-08
AL596442.1	3.33883	3.60748	2.97807e-08	8.17214e-08
AC026495.1	2.26168	3.86098	3.0419e-08	8.34213e-08
LINC02152	4.03267	4.00797	3.06044e-08	8.38666e-08
LINC01251	2.77856	3.692	3.13276e-08	8.57271e-08
AL359313.1	3.06942	3.66227	3.18835e-08	8.71942e-08
AL135787.1	2.0446	3.49547	3.30097e-08	9.01347e-08
AC016710.1	5.31823	3.72109	3.32034e-08	9.06078e-08
AC005291.2	2.31955	4.43918	3.37666e-08	9.20312e-08
LINC01602	3.98761	6.26573	3.41989e-08	9.31519e-08
AP005264.3	2.22129	2.9913	3.48573e-08	9.48577e-08
AC073174.1	4.67126	3.69518	3.70493e-08	1.00514e-07
LINC01258	2.59497	3.55803	3.82741e-08	1.03709e-07
LINC01707	2.63157	2.56526	3.92468e-08	1.0628e-07
LINC01812	2.427	2.93067	4.05757e-08	1.09711e-07
LINC02418	5.81295	5.88867	4.06217e-08	1.09802e-07
AC099506.1	2.23122	3.16499	4.22196e-08	1.13808e-07
AC111149.2	3.55519	6.71302	4.32374e-08	1.16445e-07
AL353746.1	2.50832	4.80837	4.35653e-08	1.17256e-07
AC133540.1	2.00413	3.67479	4.45443e-08	1.19746e-07
AC112693.1	2.50341	2.72357	4.46165e-08	1.19904e-07
KIRREL3-AS1	3.67247	3.86299	4.4815e-08	1.20344e-07
AC087857.1	3.54774	2.82626	4.68711e-08	1.25687e-07
LINC01805	2.57849	4.01589	4.80377e-08	1.28629e-07
LINC00851	3.28256	2.77674	4.88469e-08	1.30677e-07
PLCH1-AS2	2.06916	2.94703	4.91459e-08	1.31437e-07
TTLL11-IT1	2.03592	3.96425	4.98201e-08	1.3316e-07
AC138646.1	3.83971	2.95008	4.99788e-08	1.33532e-07
AC126696.1	2.07969	3.09726	4.99897e-08	1.33532e-07
MIR4300HG	3.18748	3.48722	5.03128e-08	1.34355e-07
LINC01885	3.69483	2.7076	5.06027e-08	1.35088e-07
AC010735.1	2.10894	3.97247	5.11398e-08	1.36481e-07
AC093496.1	3.54888	3.61676	5.21167e-08	1.39004e-07
AC016730.1	4.54965	3.39797	5.68611e-08	1.51384e-07
AP000721.2	2.01437	2.70813	5.78832e-08	1.53874e-07
DSCR4	5.66793	4.19897	5.87171e-08	1.55997e-07
LINC01647	3.72545	3.64993	5.941e-08	1.57743e-07
AC098828.3	2.35942	3.55138	6.15209e-08	1.63103e-07
NRG1-IT1	3.8005	2.85974	6.32857e-08	1.67481e-07
LINC02119	4.16461	3.26405	6.36084e-08	1.68285e-07
AC004870.2	3.37625	4.94838	6.41232e-08	1.69494e-07
LINC01173	2.68206	2.56368	6.50313e-08	1.71741e-07
AC110015.1	2.99654	3.08661	6.90817e-08	1.82057e-07
LINC02386	4.40561	3.16231	7.01901e-08	1.84758e-07
AL078590.1	3.25951	2.86193	7.09569e-08	1.86665e-07
LINC00628	2.60588	3.33651	7.14079e-08	1.8774e-07
AL353613.1	2.81031	3.26286	7.15055e-08	1.87932e-07
LINC02335	5.12136	3.58597	7.32881e-08	1.92341e-07
LINC02327	5.12065	4.97559	7.338e-08	1.92522e-07
ERVH48-1	2.9571	7.38798	7.92808e-08	2.07391e-07
AC135782.1	2.36387	3.27976	8.09196e-08	2.11366e-07
LINC01411	3.16641	2.96148	8.11317e-08	2.11857e-07
AC061975.1	2.14993	3.33255	8.37862e-08	2.18595e-07
AL136309.3	3.89417	3.55408	9.45821e-08	2.45386e-07
LINC02188	2.288	6.63341	9.71961e-08	2.51799e-07
AC073578.1	2.92147	3.02405	9.94364e-08	2.57377e-07
AL354766.2	2.40174	7.30864	1.0017e-07	2.59125e-07
AC092625.1	3.67219	2.77814	1.05976e-07	2.73184e-07
LINC02241	3.85454	6.55373	1.09308e-07	2.81528e-07
ST8SIA6-AS1	3.12801	6.9871	1.09529e-07	2.81932e-07
IDH2-DT	2.5726	3.11794	1.11695e-07	2.87174e-07
AL034397.2	2.46085	4.52158	1.17559e-07	3.00939e-07
AL355990.2	2.76755	2.60484	1.26161e-07	3.22493e-07
AC002463.1	4.12345	3.30743	1.31187e-07	3.34761e-07
AL357558.1	3.215	2.5895	1.35309e-07	3.44981e-07
AC004817.4	2.37371	3.38036	1.38923e-07	3.53582e-07
AC016687.3	4.39967	3.05419	1.39415e-07	3.54732e-07
LINC01326	4.51275	3.35273	1.39668e-07	3.55275e-07
AL354824.1	2.3161	2.60568	1.41235e-07	3.59158e-07
AP003174.1	3.72662	2.98437	1.46362e-07	3.72086e-07
LINC01446	4.17786	6.43433	1.47626e-07	3.75084e-07
AL158013.1	3.73156	2.72965	1.5199e-07	3.85398e-07
AC093802.2	5.58627	4.55294	1.52946e-07	3.87712e-07
AC104663.1	3.59292	2.76643	1.53844e-07	3.89876e-07
AC113355.1	5.90885	4.10518	1.54852e-07	3.92094e-07
PAQR9-AS1	2.48581	3.40069	1.56095e-07	3.95128e-07
AL390115.1	2.15543	2.87515	1.57009e-07	3.97328e-07
AL034376.2	3.4155	2.84494	1.62978e-07	4.11374e-07
AC092422.1	2.21763	3.2433	1.65558e-07	4.17648e-07
AF254983.1	4.46478	3.08404	1.67711e-07	4.22598e-07
BX005019.1	3.19461	2.80068	1.71469e-07	4.31574e-07
AL929601.1	3.84841	2.78601	1.73375e-07	4.3597e-07
AC083841.1	2.13593	4.13392	1.77564e-07	4.4628e-07
AL356361.2	2.36845	2.67347	1.77767e-07	4.46593e-07
AC068473.4	2.14635	3.89397	1.83254e-07	4.59797e-07
AC025524.2	2.23305	2.76325	1.8468e-07	4.62982e-07
AL136131.2	2.53793	2.94006	1.85211e-07	4.64181e-07
AC093833.1	2.12175	2.75819	1.97255e-07	4.93316e-07
AL445209.1	2.90836	2.65851	1.97282e-07	4.93316e-07
AC103952.1	2.25681	2.67061	1.98472e-07	4.96011e-07
AC010328.1	2.64854	4.23452	2.02241e-07	5.05003e-07
AC104793.1	5.52723	4.10833	2.03081e-07	5.06958e-07
AL513164.1	2.67853	3.11504	2.06616e-07	5.15491e-07
AC105177.1	4.40341	3.06737	2.09595e-07	5.2248e-07
LINC01077	2.86718	2.75235	2.13358e-07	5.31263e-07
LINC00221	5.54886	7.6801	2.16129e-07	5.37709e-07
AP001065.2	3.48459	4.35237	2.17801e-07	5.41565e-07
AC079070.1	2.44979	2.64273	2.1792e-07	5.41709e-07
AC019064.1	3.49419	2.61873	2.18108e-07	5.42022e-07
DIO2-AS1	3.03079	2.80688	2.19341e-07	5.4478e-07
AC090403.1	2.57292	3.14719	2.19556e-07	5.45163e-07
AC073062.1	3.77306	2.84336	2.2135e-07	5.49308e-07
AC092720.2	3.92843	3.13723	2.26532e-07	5.61382e-07
AC092810.3	3.01751	3.06818	2.28913e-07	5.66964e-07
LINC00303	3.06321	4.24792	2.30519e-07	5.70621e-07
LINC02196	3.21183	3.05643	2.38039e-07	5.88084e-07
AL133419.1	4.08112	2.86908	2.38924e-07	5.89613e-07
AC024475.4	3.57934	3.40606	2.50212e-07	6.1678e-07
AL592309.2	3.41073	2.58825	2.68462e-07	6.59197e-07
U91319.1	3.88362	3.64668	2.74533e-07	6.7373e-07
AC004835.1	3.2441	3.68299	2.81932e-07	6.90929e-07
LINC01731	2.668	3.33886	2.82567e-07	6.92293e-07
AC141930.2	2.25056	3.0082	2.85783e-07	6.99399e-07
AC090679.1	4.0311	3.24562	2.90067e-07	7.09686e-07
Z98257.1	2.49477	6.5211	2.9177e-07	7.13457e-07
AP003181.1	3.555	2.72694	2.92083e-07	7.14025e-07
AC087855.2	4.18451	3.03974	3.02197e-07	7.37935e-07
AP000439.3	3.71549	4.71572	3.11475e-07	7.59332e-07
EVX1-AS	2.73594	2.48952	3.22182e-07	7.83924e-07
AC010327.3	2.26824	3.67105	3.26003e-07	7.92565e-07
LINC01976	2.64592	2.88998	3.44891e-07	8.36189e-07
AC124290.1	3.69842	2.70073	3.50051e-07	8.48001e-07
LINC01574	2.91829	2.93399	3.62623e-07	8.77017e-07
CU104787.1	5.00922	3.56135	3.67303e-07	8.87849e-07
AL359924.1	3.83782	3.33529	3.69944e-07	8.93988e-07
IGF2-AS	2.44754	4.77878	3.74444e-07	9.0437e-07
AC083967.1	3.44221	4.74843	3.7687e-07	9.09733e-07
AC023481.1	2.23614	2.7277	3.89291e-07	9.37668e-07
AL355095.1	4.36171	3.03522	3.91844e-07	9.43562e-07
AC103855.3	3.52641	2.88692	3.94262e-07	9.49126e-07
AC090826.1	2.1442	4.77504	4.08331e-07	9.82193e-07
AC124254.1	2.33328	4.51232	4.14326e-07	9.96342e-07
AC005186.1	3.4727	2.99011	4.14582e-07	9.96688e-07
MAPT-IT1	3.35733	2.71164	4.19773e-07	1.00889e-06
AC090735.1	3.64577	3.3085	4.2006e-07	1.00931e-06
LINC01895	3.05106	2.52541	4.31863e-07	1.03682e-06
AC107373.1	2.76421	2.49313	4.39382e-07	1.0543e-06
LINC01033	2.68743	4.9787	4.40488e-07	1.05667e-06
AC026355.2	2.61004	2.88287	4.44452e-07	1.06502e-06
AC009292.1	2.17489	3.69442	4.46651e-07	1.07e-06
LINC02445	3.71162	2.70609	4.5237e-07	1.08253e-06
AL772337.2	-2.25745	3.63233	4.54638e-07	1.08767e-06
KCNAB1-AS2	2.69375	2.58503	4.73668e-07	1.13013e-06
AC121764.1	4.21262	6.28229	4.77211e-07	1.13797e-06
C12orf77	3.24272	4.10523	4.99768e-07	1.19013e-06
AC006262.3	3.39276	3.17963	5.18581e-07	1.23297e-06
FAM239A	2.04171	7.64876	5.24121e-07	1.24514e-06
KIRREL3-AS3	3.37617	2.65981	5.44137e-07	1.29096e-06
AC091179.1	4.11412	3.27524	5.53333e-07	1.31137e-06
AP001476.3	3.84762	2.87818	5.63607e-07	1.33465e-06
LINC02584	2.49954	3.44437	5.66772e-07	1.34178e-06
AC013640.1	2.88625	2.61953	5.73429e-07	1.35609e-06
LINC02008	4.22978	3.07063	5.76901e-07	1.36321e-06
AC245884.9	2.05398	3.26257	6.33792e-07	1.49285e-06
AC016642.1	3.40158	4.80817	6.3647e-07	1.49876e-06
LINC01749	2.40482	2.72594	6.43368e-07	1.5134e-06
AC100872.1	2.47602	3.31514	6.45676e-07	1.51842e-06
AL356364.1	4.33287	3.24806	6.58345e-07	1.54616e-06
LINC00408	4.36708	3.03874	6.8114e-07	1.59723e-06
AC007091.1	3.12005	2.94833	6.81173e-07	1.59723e-06
AC004852.2	3.89889	2.78874	6.84296e-07	1.6037e-06
AC006262.2	2.34996	3.74847	7.07614e-07	1.65528e-06
AC004147.4	2.08401	3.18031	7.12037e-07	1.66474e-06
AC087516.2	4.0115	3.66544	7.42535e-07	1.73239e-06
AC060834.2	4.94426	4.01446	7.73955e-07	1.80094e-06
AC092783.1	3.32569	2.55431	8.05629e-07	1.87366e-06
LINC01681	2.55573	2.74372	8.35805e-07	1.94231e-06
C11orf44	2.54463	3.24864	8.39532e-07	1.95046e-06
UPK1A-AS1	2.60489	4.44444	9.17716e-07	2.1254e-06
LINC00661	3.81097	3.42894	1.02156e-06	2.35665e-06
AP001476.1	2.2435	4.23955	1.04521e-06	2.4087e-06
AP000997.2	3.79137	2.97679	1.06295e-06	2.44831e-06
AC090371.1	-2.01212	3.24026	1.08271e-06	2.49057e-06
TCL6	2.10707	6.51472	1.09685e-06	2.52243e-06
AC007383.4	3.79611	4.56798	1.09827e-06	2.5248e-06
GPR50-AS1	3.03846	2.56596	1.09845e-06	2.5248e-06
LINC02042	2.1094	3.8409	1.12294e-06	2.57575e-06
AC016825.1	2.79303	2.76777	1.15256e-06	2.64094e-06
LINC02417	2.2579	3.01502	1.17635e-06	2.69152e-06
LINC01623	2.09109	3.1245	1.17646e-06	2.69152e-06
AC092335.1	3.54217	2.75823	1.18783e-06	2.71474e-06
AP000820.1	2.12517	2.81654	1.18942e-06	2.71766e-06
LINC00972	3.43655	2.76401	1.20194e-06	2.74485e-06
LINC00488	3.92936	3.47135	1.20398e-06	2.74881e-06
AC007126.1	3.14339	3.35957	1.21095e-06	2.76401e-06
AL160286.3	2.2858	2.67395	1.24606e-06	2.83828e-06
LINC01345	4.13651	3.10241	1.25373e-06	2.85502e-06
FTCD-AS1	2.8393	2.7176	1.27062e-06	2.892e-06
AC044839.3	2.7584	2.71618	1.30411e-06	2.96744e-06
LINC02065	2.36124	3.11007	1.31276e-06	2.98636e-06
FOXC2-AS1	2.36572	3.01292	1.32118e-06	3.00321e-06
AC106895.1	2.45448	3.14017	1.42103e-06	3.21942e-06
GATA3-AS1	2.16566	4.15579	1.4345e-06	3.24828e-06
AC006145.1	3.6547	3.3681	1.46012e-06	3.30376e-06
AC091138.1	2.30627	2.57746	1.48468e-06	3.35247e-06
AC148477.2	2.66087	3.87629	1.53415e-06	3.45712e-06
AL844175.1	3.49202	3.01006	1.54129e-06	3.47122e-06
LINC00534	2.16684	3.74143	1.54732e-06	3.48325e-06
PCAT18	3.00626	4.92078	1.57887e-06	3.55065e-06
AC120193.1	2.15671	4.74757	1.60067e-06	3.59785e-06
PSG8-AS1	2.64293	2.72112	1.64054e-06	3.68185e-06
AL691420.1	4.13786	3.23087	1.69466e-06	3.79849e-06
LINC01630	2.51059	3.45331	1.71737e-06	3.84648e-06
LINC02392	2.48708	2.66072	1.78446e-06	3.98967e-06
AC093281.2	2.05061	2.66829	1.83837e-06	4.10397e-06
LINC02501	5.16025	3.65905	1.85025e-06	4.12842e-06
LINC02261	2.41211	4.07791	1.86099e-06	4.14924e-06
LINC02499	3.13312	2.56628	1.8787e-06	4.18451e-06
AC108865.2	3.18915	3.09028	1.92157e-06	4.27677e-06
AC106744.2	3.96533	2.82194	1.94806e-06	4.33028e-06
OVAAL	3.0076	4.55318	2.07173e-06	4.59825e-06
LINC00237	2.83751	4.06087	2.08267e-06	4.62136e-06
LINC01228	3.31636	4.76015	2.20371e-06	4.87528e-06
AC015712.4	2.56755	3.11988	2.40967e-06	5.32425e-06
AC021683.2	2.0654	6.26443	2.42683e-06	5.35683e-06
LINC02506	3.25656	5.04596	2.55487e-06	5.63103e-06
AC093001.1	3.62227	4.30519	2.62045e-06	5.76408e-06
AC010478.1	2.18341	5.61264	2.68571e-06	5.89789e-06
LINC00052	2.97177	3.01527	2.71288e-06	5.95112e-06
AC016044.1	3.22942	3.19405	2.80544e-06	6.13742e-06
AC100839.1	2.17932	2.62701	2.81168e-06	6.14954e-06
AC073346.1	2.31814	2.57731	2.87252e-06	6.27022e-06
AC108868.2	5.29766	4.35301	2.97094e-06	6.47069e-06
LINC02046	3.33097	3.34655	2.99927e-06	6.52465e-06
LINC01467	5.01481	3.71697	3.01056e-06	6.54568e-06
AL358394.1	2.18618	4.83584	3.1162e-06	6.76872e-06
AC096736.3	4.59141	3.21376	3.19481e-06	6.93608e-06
AC090774.3	3.18608	3.65936	3.30096e-06	7.15949e-06
LINC02200	3.39917	2.88426	3.4394e-06	7.45063e-06
AC126177.4	2.23727	4.19014	3.44999e-06	7.47174e-06
AC104823.1	5.93699	5.91299	3.53245e-06	7.64659e-06
DPP10-AS1	2.58912	6.5804	3.62909e-06	7.85001e-06
LINC01425	4.36269	3.44067	3.68059e-06	7.95752e-06
AC022568.1	3.41816	4.7262	3.68971e-06	7.97529e-06
LINC00970	2.15109	4.20415	3.74786e-06	8.09703e-06
AC090502.3	3.47121	2.60119	3.77542e-06	8.15457e-06
AC010907.2	2.39301	2.66199	3.85275e-06	8.31552e-06
KAZN-AS1	2.73283	2.78562	3.87333e-06	8.35789e-06
AC073429.2	6.13562	5.52449	3.96625e-06	8.55005e-06
LINC01998	3.24629	4.33262	4.05692e-06	8.73913e-06
AC025254.1	4.14993	3.09956	4.08727e-06	8.80235e-06
LINC01179	3.07987	3.4916	4.18422e-06	9.00238e-06
AP001042.1	2.1484	2.7935	4.20494e-06	9.04256e-06
LINC00320	3.52845	2.65906	4.24143e-06	9.11439e-06
AC026116.1	3.37148	2.65542	4.24334e-06	9.11627e-06
LINC00867	2.47194	3.65164	4.35363e-06	9.34867e-06
MRGPRG-AS1	3.0948	2.83489	4.37772e-06	9.39812e-06
AC012506.3	2.51611	2.59341	4.40794e-06	9.46071e-06
DANT1	3.54616	3.00033	4.50829e-06	9.67139e-06
LINC01080	2.4309	2.58687	4.65804e-06	9.96848e-06
AC012339.1	3.65261	2.92096	4.69223e-06	1.00368e-05
LINC02002	3.58128	2.64549	4.78862e-06	1.02331e-05
AP000904.1	2.41684	4.4658	4.832e-06	1.03208e-05
LINC00939	2.02558	5.63769	4.99188e-06	1.06417e-05
AC063926.1	2.30678	2.52365	5.05006e-06	1.0758e-05
LINC00404	4.11397	3.57026	5.07936e-06	1.08178e-05
AC006372.1	2.66697	3.14426	5.19646e-06	1.10592e-05
LINC00836	4.15982	3.13605	5.39331e-06	1.14644e-05
AC079466.1	4.48777	5.68722	5.57505e-06	1.18251e-05
SOX1-OT	4.08869	4.08548	5.58108e-06	1.18351e-05
AL033381.2	2.03825	3.36419	5.6548e-06	1.19799e-05
LINC01153	2.94629	2.57237	5.90754e-06	1.25004e-05
AC093730.1	3.20623	2.58645	6.04109e-06	1.27738e-05
AC002511.1	2.0186	4.5432	6.18631e-06	1.30746e-05
AP001208.1	3.18129	2.56343	6.59697e-06	1.39093e-05
LINC01819	2.61451	6.55546	6.87041e-06	1.44651e-05
LINC01346	4.79644	4.63259	6.94313e-06	1.46078e-05
AL008638.2	5.15564	3.98797	7.2472e-06	1.52331e-05
AC116614.1	2.16827	5.01505	7.80728e-06	1.63341e-05
LINC01505	2.60635	2.99372	7.83428e-06	1.63853e-05
MIR7-3HG	3.39513	3.77297	8.00635e-06	1.67254e-05
AC055717.2	4.4095	3.06626	8.67075e-06	1.80537e-05
AC009646.2	2.25069	3.12182	8.76052e-06	1.82192e-05
AL138974.1	3.89165	3.73443	8.79506e-06	1.82781e-05
TTTY20	5.55681	3.82322	9.20143e-06	1.90589e-05
AL449403.2	3.03046	5.37861	9.36489e-06	1.93759e-05
AL354994.1	3.21111	2.52492	9.46835e-06	1.95808e-05
AC090791.1	3.62951	2.74104	9.77814e-06	2.01884e-05
AL357153.3	2.48439	2.78146	1.01501e-05	2.09369e-05
LINC01603	2.05097	2.71353	1.08592e-05	2.23474e-05
LINC02575	2.09219	8.1006	1.09305e-05	2.24783e-05
AL137026.2	3.28295	2.68241	1.11604e-05	2.29245e-05
AC126177.8	2.06896	3.63346	1.15969e-05	2.37755e-05
BX322234.2	2.17655	3.63612	1.16613e-05	2.38924e-05
LINC00911	3.06058	2.97042	1.17722e-05	2.40917e-05
AC108515.1	4.69376	3.33759	1.22766e-05	2.5076e-05
LINC02282	3.67647	2.80385	1.25783e-05	2.56584e-05
AC116609.3	2.68006	3.52278	1.26996e-05	2.5888e-05
AL161640.1	2.60417	3.03705	1.27298e-05	2.59435e-05
AL049536.1	2.37104	2.62282	1.31073e-05	2.67004e-05
AP005209.1	2.94644	2.76548	1.31777e-05	2.68192e-05
LINC01198	2.76112	3.56023	1.3478e-05	2.73926e-05
AP001011.1	2.1417	3.41092	1.37587e-05	2.79247e-05
LINC01159	4.16943	3.06392	1.4006e-05	2.84135e-05
LINC01804	4.1896	3.45664	1.42398e-05	2.88811e-05
AL589684.1	2.11246	2.61471	1.46568e-05	2.96521e-05
LINC01665	3.79656	3.36999	1.47228e-05	2.97787e-05
ROCR	2.88276	3.24997	1.47284e-05	2.97834e-05
AC099786.2	4.05563	3.18931	1.52472e-05	3.0755e-05
AC023824.5	3.79617	2.74957	1.56001e-05	3.1424e-05
AC025183.3	2.86222	2.90313	1.5742e-05	3.16953e-05
AC009118.1	2.34287	2.5883	1.60669e-05	3.23127e-05
AC021351.1	4.20799	3.45198	1.61838e-05	3.25256e-05
AC011453.1	2.68926	4.65645	1.61951e-05	3.25411e-05
AC007991.3	2.31659	3.43668	1.63805e-05	3.28837e-05
AP003071.2	3.98853	4.70311	1.66366e-05	3.33827e-05
AC074237.1	3.22441	2.64669	1.70965e-05	3.42402e-05
AC010969.1	2.2513	4.15926	1.7941e-05	3.58294e-05
AC020637.1	2.09119	2.98665	1.99428e-05	3.9649e-05
AC006065.4	3.10286	3.08077	1.99433e-05	3.9649e-05
AL117378.1	2.29017	2.52969	2.04194e-05	4.05319e-05
[truncated: 166 more rows]
