# Supplementary material for: Competing endogenous RNA (ceRNA) hypothetic model based on comprehensive analysis of long non-coding RNA expression in lung adenocarcinoma
Source: PeerJ. 2019 Nov 7;7:e8024. doi: 10.7717/peerj.8024 (PMC6842565; doi:10.7717/peerj.8024)
Supplement: Supplemental Information 4 [file peerj-07-8024-s004.xlsx]

## Sheet: tableS3
Names	Total	LncRNA
up-regulated lncRNAs in LUAD	1437	AC092115.3
		CASC20
		AC133785.1
		AC073578.1
		LINC02377
		KCNMB2-AS1
		PKP4-AS1
		AC006357.1
		AC005865.1
		FP236383.3
		AC099066.2
		AP003559.1
		AC093520.1
		AL589182.1
		AC012501.1
		BCAR4
		AL645608.7
		AC109588.1
		AL133153.2
		LINC01202
		LINC01731
		SALRNA1
		LINC00665
		AC080037.1
		AC108865.2
		AC022733.1
		LINC00698
		LINC00705
		AC009264.1
		BX005019.1
		LINC01346
		AC106875.1
		AL139023.1
		LINC02404
		LINC00460
		AC067930.5
		MAFA-AS1
		AL157931.1
		AC131009.2
		LINC02476
		LINC01701
		ST8SIA6-AS1
		AL353693.1
		LINC01429
		AC009275.1
		LINC02267
		AL391097.1
		LINC02152
		AC108174.1
		WASIR2
		LINC01574
		LINC01269
		LINC01876
		CU639417.4
		AP005233.2
		LINC02438
		CASC8
		AC141930.2
		LINC01971
		CDKN2A-DT
		DLX6-AS1
		FP325330.3
		AC117386.2
		LINC02588
		AC022201.1
		LINC01804
		AC002351.1
		AL157400.2
		AC008649.1
		U62317.2
		AC233280.1
		AC087855.2
		PAQR9-AS1
		RUNDC3A-AS1
		AL033397.1
		AL079303.1
		AL157778.1
		AL049555.1
		LINC02122
		AL592043.1
		AF127577.3
		AC005291.2
		AF279873.3
		TDRG1
		OTX2-AS1
		LINC01910
		MIR548XHG
		AC093904.4
		AC063926.1
		AC083967.1
		MNX1-AS1
		AC090809.1
		LINC01967
		AC023347.1
		AC073365.1
		FIRRE
		AC107419.1
		LINC01460
		AC087857.1
		AC012640.1
		AC100826.1
		ZFHX4-AS1
		AC025575.1
		AC112176.1
		LINC00682
		AC016550.2
		LINC00601
		AC007405.2
		MIR9-3HG
		AC087258.1
		AC060834.2
		CASC19
		AL583808.1
		AL109615.3
		AC027627.1
		LINC00629
		AL590666.3
		LINC01629
		AC022031.2
		UCA1
		AC099850.3
		AC021087.4
		AC093001.1
		AL355607.2
		LINC00887
		LINC02535
		AC006206.2
		AC005537.1
		LINC02506
		AC090578.1
		AC107308.1
		AC009262.1
		AC010307.2
		AL445072.1
		AC016723.1
		B3GALT5-AS1
		AC069277.1
		U47924.1
		AC103702.2
		AC024592.2
		LINC01206
		LINC01194
		CASC9
		AC036222.1
		LINC02560
		C11orf44
		AC022929.2
		AC016710.1
		AC074389.2
		AC008517.1
		LINC01345
		LINC01179
		AC073174.1
		AC093730.1
		AC026355.2
		AP003900.1
		AC084819.1
		AL160271.1
		AC019211.1
		AC021534.1
		AC023794.1
		LINC01456
		LINC00896
		AC005722.2
		AC011483.1
		FAM230C
		LINC01213
		AL390729.1
		AL121832.3
		LINC01205
		AL121904.1
		AC103740.2
		AC017048.3
		AF254983.1
		ZFPM2-AS1
		AP001574.1
		AC005330.1
		AC009139.1
		AP000525.1
		HOXC-AS3
		AC084816.1
		LINC01448
		AC023301.1
		AC105219.2
		TFAP2A-AS1
		AC015712.4
		MIR4527HG
		LINC02416
		SATB2-AS1
		AL512363.1
		LINC01776
		LINC02156
		AL033504.1
		AC015574.1
		C2orf48
		AL591501.1
		LINC01681
		AL365181.2
		AL390115.1
		LINC01098
		BBOX1-AS1
		AC131902.1
		AC005150.1
		AC010719.1
		AC006329.1
		AC007383.4
		NAALADL2-AS2
		AC004158.1
		AP003500.2
		HOTAIR
		AL049830.3
		LINC00536
		AC073316.1
		AL031058.1
		AC106772.1
		AC090502.1
		LINC01587
		AC007785.1
		Z97206.2
		AP001547.1
		AP003119.1
		DSCAM-AS1
		AC007731.1
		LINC02046
		AC083809.1
		LINC01393
		AC009646.2
		LINC01979
		AC099520.1
		BX324167.1
		AC092484.1
		LINC01468
		IGF2-AS
		AC079062.1
		AC091868.2
		AL133370.1
		AL513304.1
		AC007128.2
		AP001025.1
		LINC02525
		LINC02167
		AC125616.1
		AC090125.1
		AL049874.3
		LINC02313
		AC103409.1
		LINC02128
		AC061975.1
		MIR31HG
		AC090673.1
		AC122710.3
		AC078820.1
		LINC02428
		AL162411.1
		AC083841.2
		AC093904.3
		AC089983.1
		LINC01793
		LINC01968
		AC105999.2
		LINC00858
		AC122694.1
		AC025183.1
		AL596442.1
		AL691420.1
		AC003986.2
		LINC01615
		AC005064.1
		LINC01608
		LINC02448
		AL365356.4
		AC120498.4
		AC025211.1
		LINC00676
		AC025254.1
		AC108865.1
		AC024581.1
		AC087667.1
		AL136537.2
		DEPDC1-AS1
		AL133467.2
		FGF12-AS3
		LINC01833
		AL139393.1
		LINC02050
		AL022313.4
		LINC02223
		AL359313.1
		AL358394.1
		SOX1-OT
		TUSC8
		LINC00466
		LINC02065
		AC078923.1
		AC091987.1
		AC011352.3
		LINC02466
		LINC00659
		LINC02323
		AC005291.1
		AL023754.1
		AC027243.1
		BARX1-DT
		LINC01665
		LINC01687
		AC099487.1
		AP000527.1
		AC007848.1
		LINC01981
		AC008406.3
		AC109454.3
		LINC02505
		AC068305.2
		AL731684.1
		AC008109.1
		MANCR
		AL138789.1
		LSAMP-AS1
		AC006206.1
		AC097358.2
		DDX11-AS1
		AC080129.1
		AC133540.1
		AC139718.1
		AC113346.1
		LINC02584
		AC105118.1
		LINC01583
		LINC00184
		LINC02492
		LINC01192
		EPHA5-AS1
		AC016044.1
		LINC00456
		AC020907.1
		AC090673.2
		AC079160.1
		AC090503.2
		AL513164.1
		AL356364.1
		AL354707.1
		AL445524.1
		AC016205.1
		AC006372.1
		LINC01775
		SSTR5-AS1
		AC009065.5
		AC245100.6
		AC112178.1
		MIR4713HG
		LINC02522
		AL034399.2
		MRGPRG-AS1
		AC005256.1
		AC004080.2
		LINC01250
		PCAT7
		AC108025.2
		LINC01543
		AC068580.2
		MIR2052HG
		AP003390.1
		LINC02163
		AL365356.5
		AC105219.4
		EGLN3-AS1
		Z98257.1
		AC079466.1
		LINC01611
		AC112721.2
		AP000526.1
		LINC02473
		LINC01977
		LINC01158
		AC117402.1
		AC011298.1
		AL049539.1
		AP005328.1
		LINC01143
		AC111149.2
		AC106900.2
		RAPGEF4-AS1
		Z99943.1
		AC090023.2
		AP000851.2
		AL079307.1
		LINC01344
		PURPL
		LINC01885
		LINC00592
		STEAP2-AS1
		LINC01210
		PINCR
		LINC01980
		AC005722.3
		CLDN10-AS1
		LINC02348
		AC023824.5
		LINC00392
		LINC02293
		AP003174.1
		IL20RB-AS1
		U62317.1
		AC015522.1
		MIR137HG
		AC106785.2
		AL118505.1
		AL161431.1
		AC108676.1
		AL589740.1
		MAGEA10-MAGEA5
		ELFN1-AS1
		LHX1-DT
		LINC01257
		AL023755.1
		LINC00308
		KCNQ5-IT1
		AC010328.1
		AC104794.3
		AP003181.1
		AC061975.6
		AC004816.1
		AP000553.2
		SNHG4
		DGCR9
		POU6F2-AS1
		LINC00645
		LINC01419
		AFAP1-AS1
		DSCR8
		LINC00355
		AC004704.1
		AL136131.2
		AL049775.2
		AC034223.2
		FGF12-AS2
		LINC02418
		AC092803.1
		LINC02282
		MIR7-3HG
		AL138720.1
		AC019155.3
		DUXAP8
		AC012363.1
		LINC02043
		AC015818.2
		AC100791.2
		AL354719.2
		LINC01792
		G2E3-AS1
		AC134312.5
		AF131216.3
		AC093281.2
		CHODL-AS1
		CU104787.1
		LUARIS
		AC091133.2
		LINC00898
		AL356234.2
		ERVMER61-1
		LINC00941
		AC006262.2
		FAM83C-AS1
		SLC2A1-AS1
		LINC02303
		OVAAL
		AL121827.2
		AL008721.1
		LINC02109
		LINC00511
		AC009121.1
		LINC01385
		AC013652.1
		AC090192.2
		AC008060.1
		FAM83A-AS1
		AC053503.2
		LINC02477
		LINC02086
		MIR5689HG
		AC148477.4
		AC020551.1
		AC131532.1
		AL445209.1
		LINC01391
		AC090193.1
		MYOSLID
		AC020891.3
		AC006064.3
		LINC00958
		AL359551.1
		LINC02159
		LINC00337
		AC100782.1
		AC005307.1
		IGFL2-AS1
		AC026785.3
		AL353746.1
		AC106744.2
		LINC01116
		AC008115.2
		AC004221.1
		DPP10-AS1
		LINC02527
		LINC01564
		LINC01356
		HOXC-AS1
		LINC01703
		LINC01572
		AL162413.1
		AC114812.2
		NPSR1-AS1
		AC110285.6
		AC016687.3
		AC114912.1
		AL138962.1
		AC090774.3
		LINC00862
		LINC01214
		AC006946.2
		LINC02003
		LINC01614
		SPATA3-AS1
		AL160408.4
		LINC00626
		AC005186.1
		AL354993.1
		AC073323.1
		AC068228.1
		ARNTL2-AS1
		AL391361.3
		AC020934.1
		VPS9D1-AS1
		AP000904.1
		AC055717.2
		LINC00525
		AC022784.3
		AL133325.3
		LINC01322
		AC002378.1
		AL033397.2
		HOXA10-AS
		LINC01886
		AC003958.2
		AL606970.1
		SCHLAP1
		LINP1
		LINC02387
		LINC02437
		AP000439.2
		AL008638.2
		LINC00051
		AC010099.4
		MYCNOS
		PCAT6
		AC025166.1
		AC027228.2
		AC011287.2
		AL109761.1
		AC012213.1
		AP000997.2
		AP005328.2
		AC092920.1
		AC004888.1
		LINC01470
		AC010327.3
		LINC01976
		AL021395.1
		AC013731.1
		AC024560.1
		DIO2-AS1
		AC010595.1
		AL359851.1
		FAM222A-AS1
		HOXB-AS4
		LINC02544
		AC083973.1
		LINC01819
		TTLL11-IT1
		H19
		LINC01924
		AC021683.2
		TMEM132D-AS1
		AL391152.1
		LINC00393
		AC020928.2
		LINC01667
		AC040174.1
		AC010735.1
		HAGLROS
		LINC02188
		LINC02178
		AC109830.1
		SMILR
		AC006065.4
		AC007128.1
		LINC02327
		AC026250.1
		LINC02105
		AL133215.2
		AC123768.1
		AL022324.3
		AC116049.2
		AC040174.2
		LINC00488
		AC116666.1
		AC026462.3
		DANT1
		FEZF1-AS1
		AC114316.2
		AC112236.1
		AL589743.5
		LINC01425
		LINC01807
		AC011611.2
		AC034206.1
		AL109924.2
		LINC01249
		AC010894.3
		AC114489.1
		AC083801.2
		AL138974.1
		AC007848.2
		AC012531.1
		AL035252.2
		AC107886.1
		AC092916.1
		AC106771.1
		AL662890.1
		AC116025.2
		LINC01812
		AL136298.1
		DSG1-AS1
		AC024230.1
		AC005993.1
		AC007159.1
		LINC01511
		LINC01561
		AC023421.1
		AL133372.2
		AC091182.2
		LINC02253
		AP000251.1
		LINC00519
		LINC01559
		PLUT
		LINC02014
		AC106799.2
		LINC02310
		LINC00319
		AC006262.1
		LINC01711
		AL031658.2
		AC126696.3
		AC093515.1
		AC093702.1
		HOXC13-AS
		AC122710.1
		LINC01633
		AF106564.1
		AC002076.1
		AC007639.1
		AC008750.3
		AP000997.1
		AC090826.1
		AC006145.1
		LINC02141
		HOXA11-AS
		AC016877.3
		AP002478.1
		APCDD1L-DT
		AP003500.1
		AC093833.1
		AC090116.1
		LINC01305
		AC093904.2
		LINC01842
		AC098936.1
		AC004009.1
		LINC02443
		AC122134.1
		LINC01287
		RBAKDN
		LINC00200
		AL445647.1
		LINC02081
		BLACAT1
		AC011700.1
		AL133467.4
		C10orf91
		AL590644.1
		LINC01087
		AL596223.1
		AP001453.2
		AC034223.1
		LINC01524
		AC106744.1
		SNHG27
		AC128689.1
		AC004034.1
		LINC00867
		AL122008.3
		AC138904.1
		AL645608.9
		LINC00383
		AC137834.2
		AC022784.8
		AC020891.2
		LINC02335
		MIR4300HG
		LINC01518
		C5orf66-AS1
		AC087612.1
		AL512488.1
		LINC02111
		AL139385.1
		AC110015.1
		PCAT18
		AC002463.1
		AL160408.1
		AC092447.5
		AL138902.1
		AC004870.2
		AP000424.1
		AC123905.1
		AL354824.2
		LINC00491
		LINC00461
		LINC02562
		AC091057.4
		AC022639.1
		LINC01096
		AC090502.3
		AC015849.5
		GRM5-AS1
		AL136221.1
		LINC00942
		LINC02008
		AC022784.1
		AC138305.1
		AC087473.1
		LINC01411
		AL117329.1
		AC135782.1
		AC009097.2
		LINC00221
		AL391427.1
		AC097512.1
		AC100801.1
		AC112493.1
		AC069061.2
		LINC02321
		AC138761.3
		SOX21-AS1
		AP000842.3
		FER1L6-AS2
		AL109954.2
		LINC01475
		LINC01697
		AC011287.1
		LINC01208
		SLC12A9-AS1
		AL138760.1
		AC104088.1
		LINC00707
		AC007389.3
		AP005230.1
		MIR124-2HG
		AL513123.1
		LINC02475
		AL645608.3
		CALML3-AS1
		AC105460.1
		HOXC-AS2
		LINC00501
		AC246793.1
		DSCR4
		ABCA9-AS1
		AC025575.2
		AC010478.1
		LINC01992
		CR392039.3
		AC109439.2
		AC012213.4
		AC012174.1
		AC020658.4
		AC093895.1
		AC010343.3
		AC108136.1
		AL122019.1
		LINC02055
		GACAT2
		LINC02048
		LINC02454
		LINC00668
		AC148477.2
		AC012339.1
		AC091179.1
		AL121772.1
		LINC01705
		LINC02196
		AC010168.1
		CYP4A22-AS1
		AC090709.1
		LINC01854
		POU6F2-AS2
		AC114296.1
		AC023824.3
		LINC00518
		AP003469.2
		LINC01446
		LINC02241
		AL139042.1
		AL354824.1
		AC114803.1
		AL590666.2
		AC008083.1
		AC011352.1
		LINC01551
		AC069120.1
		LINC01748
		AC010275.1
		AL139412.1
		AL163953.1
		LINC00628
		LINC02484
		AC124290.1
		AL139002.1
		AC104793.1
		LINC01297
		AP003721.1
		LINC01896
		AC084864.1
		AC023824.1
		AC096669.1
		LINC01234
		IDH2-DT
		LINC00648
		SAMMSON
		AL354993.2
		KC877982.1
		AC011632.1
		LINC02582
		AC009630.2
		AC008443.3
		AC015712.6
		C3orf67-AS1
		LINC02417
		AC025524.2
		AF015262.1
		AC013391.3
		TBL1XR1-AS1
		AC090627.1
		PVT1
		FOXD3-AS1
		AL136018.1
		AC026336.3
		AC106799.3
		TRPM2-AS
		AC106799.1
		AC003092.1
		AC008060.4
		LINC01224
		AC010789.1
		AL365181.3
		AC209154.2
		LINC00871
		AC132807.2
		AP000696.1
		LINC01873
		LINC01956
		LINC00973
		AF121898.1
		AC068985.1
		AL355483.1
		AC012506.3
		AL445531.1
		HOTTIP
		AC074237.1
		AP005137.2
		LINC02307
		AC096759.2
		LINC00470
		MAGEA4-AS1
		AL445471.1
		LINC02208
		AC125603.2
		AC010967.1
		AL138759.1
		AC129926.1
		ERVH48-1
		AC126407.1
		AC025244.1
		LINC02315
		AL590708.1
		AC010486.3
		CERNA3
		AC139792.1
		AC103770.1
		AF127936.2
		RMRP
		AC058791.1
		AL161668.1
		AC104137.1
		AC012568.1
		SAMSN1-AS1
		FER1L6-AS1
		AC087482.1
		AC246787.2
		AL589765.6
		E2F3-IT1
		AC125603.1
		LINC01744
		AC007431.2
		AC008568.1
		AC117465.1
		AL596218.1
		AC126323.3
		AC022148.1
		HNF1A-AS1
		AP000897.1
		AC112721.1
		CASC16
		AC008392.1
		EGOT
		AC090220.1
		AP003062.1
		NAALADL2-AS3
		LINC01983
		U52111.1
		AL034376.1
		AC037487.2
		LINC01843
		LINC00440
		AC091173.1
		AL096828.3
		AC069542.1
		AC026320.1
		ATP11AUN
		AC016493.1
		AC106873.1
		ASTN2-AS1
		AL356133.2
		LINC02015
		AC097716.1
		ARHGAP26-AS1
		AC079866.2
		LINC01270
		LINC02468
		AL133343.2
		LINC00330
		AC106876.1
		AC117500.1
		LINC01502
		AC006148.1
		LINC01444
		FP671120.3
		AC010145.1
		GACAT3
		AL590004.4
		AP002754.1
		AL442224.1
		TDRKH-AS1
		LINC02266
		AC108451.2
		LINC00524
		AC012404.1
		CHL1-AS1
		AC092325.1
		AC018442.2
		AC008063.2
		AC009686.1
		LINC01607
		AC005550.2
		AC009005.1
		AL589642.2
		AC022537.1
		AL365356.1
		AC108058.1
		AL360091.2
		DSCR10
		AP002498.1
		LINC01597
		MNX1-AS2
		AL022313.2
		LINC02294
		AC239800.2
		DDN-AS1
		AC104574.2
		AP003031.1
		AC127029.2
		LINC02133
		AC010609.1
		AC091043.1
		LINC02331
		AC048383.1
		AL355596.1
		AC023154.1
		AC096577.1
		AF274573.1
		AC005996.1
		PLCB1-IT1
		LPP-AS1
		AL352984.1
		AL450345.1
		AL079304.1
		LINC02385
		AC073284.1
		LEMD1-AS1
		AC211433.1
		LINC01659
		AL353803.1
		AC069228.1
		AP000462.1
		LINC00567
		AL606970.3
		LINC02463
		AC008554.1
		AC099788.1
		AC099677.4
		LINC01993
		AP006333.2
		AC144450.1
		AC019171.1
		AC073578.2
		AC145146.1
		KIF25-AS1
		AC013286.1
		AC239584.1
		C1orf220
		LINC02300
		LINC01978
		AC068643.1
		AC016831.5
		LINC00824
		AL445183.2
		ZBTB46-AS1
		AC099509.1
		LINC01740
		AL117341.1
		AC133106.1
		AC021594.1
		STK32A-AS1
		AC004149.1
		AC131097.3
		AC009065.2
		AC104232.2
		AC021683.1
		VAC14-AS1
		AC104461.1
		LINC02362
		AC023905.1
		AC074327.1
		AP000844.2
		AL035634.1
		AC013437.1
		AC025031.4
		AC141930.1
		AC111000.4
		CACNA1C-AS4
		AL161729.2
		CACNA1C-IT3
		AC130895.1
		U62317.5
		AC016576.1
		AC105760.1
		AC053503.1
		AL589863.1
		AL390774.2
		AC110741.1
		AC007993.2
		AC096721.1
		AL355075.4
		MIR194-2HG
		AC016716.2
		LINC00589
		AF130417.1
		LINC01443
		AP003351.1
		AC010735.2
		AC243830.1
		AL132709.1
		AC005090.1
		AC105150.1
		AL356055.1
		AC091151.1
		AC013724.1
		LINC00485
		LINC01436
		AL391811.1
		AC100774.1
		AC096734.1
		AC010307.4
		LINC01299
		AC024901.1
		AC092535.1
		AC117386.1
		LINC01969
		AC007368.2
		AC110921.1
		AC084262.1
		LINC01926
		C10orf71-AS1
		AC026368.1
		MAGI1-AS1
		LINC02037
		LINC01271
		AC090753.1
		AC100763.1
		AL353753.1
		AC007448.2
		LINC01940
		AC003965.2
		AC126323.6
		AL121900.1
		AC092675.1
		LINC02470
		AC068858.1
		AL357033.2
		AC099329.2
		MIR670HG
		AC110619.1
		AC020687.1
		AL391863.2
		DRAIC
		AC116345.1
		ARHGEF3-AS1
		AL157838.1
		AP000424.2
		AL078587.1
		AC112495.1
		LINC02263
		AC015923.1
		AC129507.4
		AL109914.1
		AC099673.1
		AC103957.1
		AC008456.1
		AC104248.1
		AC099342.1
		AC098798.1
		SLC9A9-AS1
		AC008063.1
		AC087273.1
		AC145343.1
		AC254629.1
		AL365226.2
		AC084026.1
		AL121956.1
		LINC02347
		AL391095.2
		LINC01204
		AC027088.3
		AC012594.1
		AL034349.1
		AC018541.1
		AP005271.1
		TBC1D3P1-DHX40P1
		AC046158.1
		FOXP1-IT1
		AC007533.1
		AC068722.1
		AC126696.2
		AC106882.1
		AP002833.2
		AP000688.2
		AC090164.2
		AC145207.1
		AC087379.1
		LINC02228
		AC243972.1
		AC096741.1
		MACC1-AS1
		LINC02078
		AP004608.1
		AC022028.2
		HECW1-IT1
		AP000462.2
		LINC01580
		LINC01913
		AL353803.2
		LINC02106
		AC023090.1
		RMDN2-AS1
		AC100800.1
		AC022173.1
		AC009743.1
		AL590637.1
		AL117190.1
		AL356417.2
		AC244250.1
		LINC02474
		AC022809.1
		AC012065.1
		AC015921.1
		MIR181A1HG
		AC007431.1
		AL035401.1
		LINC00866
		AC107959.3
		AC068535.1
		LINC02343
		LUCAT1
		AP000542.2
		AC015813.4
		AC016868.1
		PANCR
		LINC00160
		LINC02027
		LINC00543
		PRKCA-AS1
		LINC02433
		AC012317.1
		NHS-AS1
		VCAN-AS1
		AC008496.2
		LINC02490
		AC104024.2
		AL513548.1
		BIRC6-AS1
		AL844908.1
		LINC01788
		AP001970.1
		FNDC1-IT1
		AC090541.1
		AC007529.1
		AC015909.1
		LINC02257
		DPYD-AS1
		AL355312.4
		AC027514.1
		AL157402.2
		AC239803.3
		AL136987.1
		AC022240.1
		AL391056.1
		LINC01959
		AC114488.1
		AL031710.2
		AC006946.3
		AC104982.1
		LINC00879
		DPYD-AS2
		AC025419.1
		STPG3-AS1
		AC007494.2
		AL359853.1
		AC068724.1
		LINC00857
		AC245128.1
		GRM7-AS3
		LINC02576
		AC021818.1
		AC023796.2
		AL513327.2
		ITGB1-DT
		AP001626.1
		AC105031.2
		AL139420.1
		LINC02411
		AC136475.3
		AC073651.1
		AC144521.1
		AC093903.1
		AC084026.2
		AL139420.2
		AC011294.1
		AL611929.1
		AC131097.1
		AC079384.1
		AC025434.1
		AC098868.1
		AC002511.2
		AC110813.1
		ATG10-AS1
		ZBTB20-AS5
		AC090164.3
		AP002957.1
		LINC02398
		AC005828.2
		LINC00473
		AL133284.1
		AC022098.2
		AL161938.1
		MTOR-AS1
		LINC02365
		AC089999.2
		AL451137.1
		AL022314.1
		AC099518.1
		FP236383.1
		CYMP-AS1
		LINC01303
		AC022424.1
		LINC02312
		AC104699.1
		AC008870.3
		AC090802.1
		AL034345.2
		ZBTB20-AS1
		AC073316.2
		TRIM31-AS1
		AC148476.1
		AC113615.1
		AF178030.1
		AC127164.1
		AL731533.2
		LINC00251
		AC139722.1
		TESC-AS1
		LINC01312
		AC010857.1
		AC097625.1
		LINC01079
		AC078950.1
		AC093817.1
		AL390718.1
		AC087045.2
		AC116096.1
		SLC8A1-AS1
		AL162582.1
		LINC01593
		LINC00624
		PHACTR2-AS1
		AC099313.1
		AC020663.2
		HAR1B
		Z94160.1
		AC120042.3
		AP003108.1
		AL592494.1
		LINC01831
		AL445223.1
		LINC01221
		AL356311.1
		AC009884.1
		AC131971.1
		AC007368.1
		LINC01449
		AC092436.2
		AC079089.1
		AL031767.1
		AC023794.3
		AP001803.2
		AF127577.2
		AL162584.1
		LINC00602
		AC009135.1
		ST7-OT4
		AC138393.3
		AL355916.1
		LINC01878
		AL096865.1
		AC040963.1
		AC068189.1
		AL591926.2
		AL022341.2
		AL355512.1
		AC064807.2
		AC113398.2
		AC092800.1
		AC021218.1
		AP003472.2
		AL391863.1
		LINC02533
		AC068389.4
		AC244205.1
		LINC01348
		AC131211.1
		AC025580.1
		ZBTB20-AS3
		AL365258.1
		AL391845.2
		LINC02332
		AC007285.2
		AL513188.1
		AC073525.1
		AC120036.4
		AC090833.1
		AC090515.4
		Z82173.1
		AC021127.1
		AC025154.2
		AL359095.1
		RNF144A-AS1
		AL353807.2
		MEG3
		AC090707.1
		PROX1-AS1
		AP003472.1
		LINC02192
		AC092801.1
		MIR3976HG
		AC103853.1
		AC010547.2
		AC000061.1
		LINC01510
		AL162431.1
		CPS1-IT1
		LINC00880
		LINC01433
		AL354861.2
		AC109446.3
		FRGCA
		PLAC4
		AC078850.2
		Z85994.1
		AL513324.1
		LINC01426
		AC055733.2
		LINC02029
		AC069079.1
		AP000977.1
		AL078601.2
		AL359764.1
		LINC01970
		SYNPR-AS1
		AC009313.1
		AC139491.2
		C20orf197
		AC092198.1
		AC008738.4
		AC008277.1
		AC087269.1
		ERVK-28
		Z84485.1
		AC008808.2
		LINC02324
		AL451047.1
		LINC01040
		AL139120.1
		AC131182.1
		AC005808.1
		LINC02260
		AC073530.1
		AL157937.1
		AL359636.2

## Sheet: tableS4
Names	Total	LncRNA
up-regulated lncRNAs in LUSC	1699	AC092115.3
		CASC20
		AC133785.1
		AC073578.1
		LINC02377
		KCNMB2-AS1
		PKP4-AS1
		AC006357.1
		AC005865.1
		FP236383.3
		AC099066.2
		AP003559.1
		AC093520.1
		AL589182.1
		AC012501.1
		BCAR4
		AL645608.7
		AC109588.1
		AL133153.2
		LINC01202
		LINC01731
		SALRNA1
		LINC00665
		AC080037.1
		AC108865.2
		AC022733.1
		LINC00698
		LINC00705
		AC009264.1
		BX005019.1
		LINC01346
		AC106875.1
		AL139023.1
		LINC02404
		LINC00460
		AC067930.5
		MAFA-AS1
		AL157931.1
		AC131009.2
		LINC02476
		LINC01701
		ST8SIA6-AS1
		AL353693.1
		LINC01429
		AC009275.1
		LINC02267
		AL391097.1
		LINC02152
		AC108174.1
		WASIR2
		LINC01574
		LINC01269
		LINC01876
		CU639417.4
		AP005233.2
		LINC02438
		CASC8
		AC141930.2
		LINC01971
		CDKN2A-DT
		DLX6-AS1
		FP325330.3
		AC117386.2
		LINC02588
		AC022201.1
		LINC01804
		AC002351.1
		AL157400.2
		AC008649.1
		U62317.2
		AC233280.1
		AC087855.2
		PAQR9-AS1
		RUNDC3A-AS1
		AL033397.1
		AL079303.1
		AL157778.1
		AL049555.1
		LINC02122
		AL592043.1
		AF127577.3
		AC005291.2
		AF279873.3
		TDRG1
		OTX2-AS1
		LINC01910
		MIR548XHG
		AC093904.4
		AC063926.1
		AC083967.1
		MNX1-AS1
		AC090809.1
		LINC01967
		AC023347.1
		AC073365.1
		FIRRE
		AC107419.1
		LINC01460
		AC087857.1
		AC012640.1
		AC100826.1
		ZFHX4-AS1
		AC025575.1
		AC112176.1
		LINC00682
		AC016550.2
		LINC00601
		AC007405.2
		MIR9-3HG
		AC087258.1
		AC060834.2
		CASC19
		AL583808.1
		AL109615.3
		AC027627.1
		LINC00629
		AL590666.3
		LINC01629
		AC022031.2
		UCA1
		AC099850.3
		AC021087.4
		AC093001.1
		AL355607.2
		LINC00887
		LINC02535
		AC006206.2
		AC005537.1
		LINC02506
		AC090578.1
		AC107308.1
		AC009262.1
		AC010307.2
		AL445072.1
		AC016723.1
		B3GALT5-AS1
		AC069277.1
		U47924.1
		AC103702.2
		AC024592.2
		LINC01206
		LINC01194
		CASC9
		AC036222.1
		LINC02560
		C11orf44
		AC022929.2
		AC016710.1
		AC074389.2
		AC008517.1
		LINC01345
		LINC01179
		AC073174.1
		AC093730.1
		AC026355.2
		AP003900.1
		AC084819.1
		AL160271.1
		AC019211.1
		AC021534.1
		AC023794.1
		LINC01456
		LINC00896
		AC005722.2
		AC011483.1
		FAM230C
		LINC01213
		AL390729.1
		AL121832.3
		LINC01205
		AL121904.1
		AC103740.2
		AC017048.3
		AF254983.1
		ZFPM2-AS1
		AP001574.1
		AC005330.1
		AC009139.1
		AP000525.1
		HOXC-AS3
		AC084816.1
		LINC01448
		AC023301.1
		AC105219.2
		TFAP2A-AS1
		AC015712.4
		MIR4527HG
		LINC02416
		SATB2-AS1
		AL512363.1
		LINC01776
		LINC02156
		AL033504.1
		AC015574.1
		C2orf48
		AL591501.1
		LINC01681
		AL365181.2
		AL390115.1
		LINC01098
		BBOX1-AS1
		AC131902.1
		AC005150.1
		AC010719.1
		AC006329.1
		AC007383.4
		NAALADL2-AS2
		AC004158.1
		AP003500.2
		HOTAIR
		AL049830.3
		LINC00536
		AC073316.1
		AL031058.1
		AC106772.1
		AC090502.1
		LINC01587
		AC007785.1
		Z97206.2
		AP001547.1
		AP003119.1
		DSCAM-AS1
		AC007731.1
		LINC02046
		AC083809.1
		LINC01393
		AC009646.2
		LINC01979
		AC099520.1
		BX324167.1
		AC092484.1
		LINC01468
		IGF2-AS
		AC079062.1
		AC091868.2
		AL133370.1
		AL513304.1
		AC007128.2
		AP001025.1
		LINC02525
		LINC02167
		AC125616.1
		AC090125.1
		AL049874.3
		LINC02313
		AC103409.1
		LINC02128
		AC061975.1
		MIR31HG
		AC090673.1
		AC122710.3
		AC078820.1
		LINC02428
		AL162411.1
		AC083841.2
		AC093904.3
		AC089983.1
		LINC01793
		LINC01968
		AC105999.2
		LINC00858
		AC122694.1
		AC025183.1
		AL596442.1
		AL691420.1
		AC003986.2
		LINC01615
		AC005064.1
		LINC01608
		LINC02448
		AL365356.4
		AC120498.4
		AC025211.1
		LINC00676
		AC025254.1
		AC108865.1
		AC024581.1
		AC087667.1
		AL136537.2
		DEPDC1-AS1
		AL133467.2
		FGF12-AS3
		LINC01833
		AL139393.1
		LINC02050
		AL022313.4
		LINC02223
		AL359313.1
		AL358394.1
		SOX1-OT
		TUSC8
		LINC00466
		LINC02065
		AC078923.1
		AC091987.1
		AC011352.3
		LINC02466
		LINC00659
		LINC02323
		AC005291.1
		AL023754.1
		AC027243.1
		BARX1-DT
		LINC01665
		LINC01687
		AC099487.1
		AP000527.1
		AC007848.1
		LINC01981
		AC008406.3
		AC109454.3
		LINC02505
		AC068305.2
		AL731684.1
		AC008109.1
		MANCR
		AL138789.1
		LSAMP-AS1
		AC006206.1
		AC097358.2
		DDX11-AS1
		AC080129.1
		AC133540.1
		AC139718.1
		AC113346.1
		LINC02584
		AC105118.1
		LINC01583
		LINC00184
		LINC02492
		LINC01192
		EPHA5-AS1
		AC016044.1
		LINC00456
		AC020907.1
		AC090673.2
		AC079160.1
		AC090503.2
		AL513164.1
		AL356364.1
		AL354707.1
		AL445524.1
		AC016205.1
		AC006372.1
		LINC01775
		SSTR5-AS1
		AC009065.5
		AC245100.6
		AC112178.1
		MIR4713HG
		LINC02522
		AL034399.2
		MRGPRG-AS1
		AC005256.1
		AC004080.2
		LINC01250
		PCAT7
		AC108025.2
		LINC01543
		AC068580.2
		MIR2052HG
		AP003390.1
		LINC02163
		AL365356.5
		AC105219.4
		EGLN3-AS1
		Z98257.1
		AC079466.1
		LINC01611
		AC112721.2
		AP000526.1
		LINC02473
		LINC01977
		LINC01158
		AC117402.1
		AC011298.1
		AL049539.1
		AP005328.1
		LINC01143
		AC111149.2
		AC106900.2
		RAPGEF4-AS1
		Z99943.1
		AC090023.2
		AP000851.2
		AL079307.1
		LINC01344
		PURPL
		LINC01885
		LINC00592
		STEAP2-AS1
		LINC01210
		PINCR
		LINC01980
		AC005722.3
		CLDN10-AS1
		LINC02348
		AC023824.5
		LINC00392
		LINC02293
		AP003174.1
		IL20RB-AS1
		U62317.1
		AC015522.1
		MIR137HG
		AC106785.2
		AL118505.1
		AL161431.1
		AC108676.1
		AL589740.1
		MAGEA10-MAGEA5
		ELFN1-AS1
		LHX1-DT
		LINC01257
		AL023755.1
		LINC00308
		KCNQ5-IT1
		AC010328.1
		AC104794.3
		AP003181.1
		AC061975.6
		AC004816.1
		AP000553.2
		SNHG4
		DGCR9
		POU6F2-AS1
		LINC00645
		LINC01419
		AFAP1-AS1
		DSCR8
		LINC00355
		AC004704.1
		AL136131.2
		AL049775.2
		AC034223.2
		FGF12-AS2
		LINC02418
		AC092803.1
		LINC02282
		MIR7-3HG
		AL138720.1
		AC019155.3
		DUXAP8
		AC012363.1
		LINC02043
		AC015818.2
		AC100791.2
		AL354719.2
		LINC01792
		G2E3-AS1
		AC134312.5
		AF131216.3
		AC093281.2
		CHODL-AS1
		CU104787.1
		LUARIS
		AC091133.2
		LINC00898
		AL356234.2
		ERVMER61-1
		LINC00941
		AC006262.2
		FAM83C-AS1
		SLC2A1-AS1
		LINC02303
		OVAAL
		AL121827.2
		AL008721.1
		LINC02109
		LINC00511
		AC009121.1
		LINC01385
		AC013652.1
		AC090192.2
		AC008060.1
		FAM83A-AS1
		AC053503.2
		LINC02477
		LINC02086
		MIR5689HG
		AC148477.4
		AC020551.1
		AC131532.1
		AL445209.1
		LINC01391
		AC090193.1
		MYOSLID
		AC020891.3
		AC006064.3
		LINC00958
		AL359551.1
		LINC02159
		LINC00337
		AC100782.1
		AC005307.1
		IGFL2-AS1
		AC026785.3
		AL353746.1
		AC106744.2
		LINC01116
		AC008115.2
		AC004221.1
		DPP10-AS1
		LINC02527
		LINC01564
		LINC01356
		HOXC-AS1
		LINC01703
		LINC01572
		AL162413.1
		AC114812.2
		NPSR1-AS1
		AC110285.6
		AC016687.3
		AC114912.1
		AL138962.1
		AC090774.3
		LINC00862
		LINC01214
		AC006946.2
		LINC02003
		LINC01614
		SPATA3-AS1
		AL160408.4
		LINC00626
		AC005186.1
		AL354993.1
		AC073323.1
		AC068228.1
		ARNTL2-AS1
		AL391361.3
		AC020934.1
		VPS9D1-AS1
		AP000904.1
		AC055717.2
		LINC00525
		AC022784.3
		AL133325.3
		LINC01322
		AC002378.1
		AL033397.2
		HOXA10-AS
		LINC01886
		AC003958.2
		AL606970.1
		SCHLAP1
		LINP1
		LINC02387
		LINC02437
		AP000439.2
		AL008638.2
		LINC00051
		AC010099.4
		MYCNOS
		PCAT6
		AC025166.1
		AC027228.2
		AC011287.2
		AL109761.1
		AC012213.1
		AP000997.2
		AP005328.2
		AC092920.1
		AC004888.1
		LINC01470
		AC010327.3
		LINC01976
		AL021395.1
		AC013731.1
		AC024560.1
		DIO2-AS1
		AC010595.1
		AL359851.1
		FAM222A-AS1
		HOXB-AS4
		LINC02544
		AC083973.1
		LINC01819
		TTLL11-IT1
		H19
		LINC01924
		AC021683.2
		TMEM132D-AS1
		AL391152.1
		LINC00393
		AC020928.2
		LINC01667
		AC040174.1
		AC010735.1
		HAGLROS
		LINC02188
		LINC02178
		AC109830.1
		SMILR
		AC006065.4
		AC007128.1
		LINC02327
		AC026250.1
		LINC02105
		AL133215.2
		AC123768.1
		AL022324.3
		AC116049.2
		AC040174.2
		LINC00488
		AC116666.1
		AC026462.3
		DANT1
		FEZF1-AS1
		AC114316.2
		AC112236.1
		AL589743.5
		LINC01425
		LINC01807
		AC011611.2
		AC034206.1
		AL109924.2
		LINC01249
		AC010894.3
		AC114489.1
		AC083801.2
		AL138974.1
		AC007848.2
		AC012531.1
		AL035252.2
		AC107886.1
		AC092916.1
		AC106771.1
		AL662890.1
		AC116025.2
		LINC01812
		AL136298.1
		DSG1-AS1
		AC024230.1
		AC005993.1
		AC007159.1
		LINC01511
		LINC01561
		AC023421.1
		AL133372.2
		AC091182.2
		LINC02253
		AP000251.1
		LINC00519
		LINC01559
		PLUT
		LINC02014
		AC106799.2
		LINC02310
		LINC00319
		AC006262.1
		LINC01711
		AL031658.2
		AC126696.3
		AC093515.1
		AC093702.1
		HOXC13-AS
		AC122710.1
		LINC01633
		AF106564.1
		AC002076.1
		AC007639.1
		AC008750.3
		AP000997.1
		AC090826.1
		AC006145.1
		LINC02141
		HOXA11-AS
		AC016877.3
		AP002478.1
		APCDD1L-DT
		AP003500.1
		AC093833.1
		AC090116.1
		LINC01305
		AC093904.2
		LINC01842
		AC098936.1
		AC004009.1
		LINC02443
		AC122134.1
		LINC01287
		RBAKDN
		LINC00200
		AL445647.1
		LINC02081
		BLACAT1
		AC011700.1
		AL133467.4
		C10orf91
		AL590644.1
		LINC01087
		AL596223.1
		AP001453.2
		AC034223.1
		LINC01524
		AC106744.1
		SNHG27
		AC128689.1
		AC004034.1
		LINC00867
		AL122008.3
		AC138904.1
		AL645608.9
		LINC00383
		AC137834.2
		AC022784.8
		AC020891.2
		LINC02335
		MIR4300HG
		LINC01518
		C5orf66-AS1
		AC087612.1
		AL512488.1
		LINC02111
		AL139385.1
		AC110015.1
		PCAT18
		AC002463.1
		AL160408.1
		AC092447.5
		AL138902.1
		AC004870.2
		AP000424.1
		AC123905.1
		AL354824.2
		LINC00491
		LINC00461
		LINC02562
		AC091057.4
		AC022639.1
		LINC01096
		AC090502.3
		AC015849.5
		GRM5-AS1
		AL136221.1
		LINC00942
		LINC02008
		AC022784.1
		AC138305.1
		AC087473.1
		LINC01411
		AL117329.1
		AC135782.1
		AC009097.2
		LINC00221
		AL391427.1
		AC097512.1
		AC100801.1
		AC112493.1
		AC069061.2
		LINC02321
		AC138761.3
		SOX21-AS1
		AP000842.3
		FER1L6-AS2
		AL109954.2
		LINC01475
		LINC01697
		AC011287.1
		LINC01208
		SLC12A9-AS1
		AL138760.1
		AC104088.1
		LINC00707
		AC007389.3
		AP005230.1
		MIR124-2HG
		AL513123.1
		LINC02475
		AL645608.3
		CALML3-AS1
		AC105460.1
		HOXC-AS2
		LINC00501
		AC246793.1
		DSCR4
		ABCA9-AS1
		AC025575.2
		AC010478.1
		LINC01992
		CR392039.3
		AC109439.2
		AC012213.4
		AC012174.1
		AC020658.4
		AC093895.1
		AC010343.3
		AC108136.1
		AL122019.1
		LINC02055
		GACAT2
		LINC02048
		LINC02454
		LINC00668
		AC148477.2
		AC012339.1
		AC091179.1
		AL121772.1
		LINC01705
		LINC02196
		AC010168.1
		CYP4A22-AS1
		AC090709.1
		LINC01854
		POU6F2-AS2
		AC114296.1
		AC023824.3
		LINC00518
		AP003469.2
		LINC01446
		LINC02241
		AL139042.1
		AL354824.1
		AC114803.1
		AL590666.2
		AC008083.1
		AC011352.1
		LINC01551
		AC069120.1
		LINC01748
		AC010275.1
		AL139412.1
		AL163953.1
		LINC00628
		LINC02484
		AC124290.1
		AL139002.1
		AC104793.1
		LINC01297
		AP003721.1
		LINC01896
		AC084864.1
		AC023824.1
		AC096669.1
		LINC01234
		IDH2-DT
		LINC00648
		SAMMSON
		AL354993.2
		KC877982.1
		AC011632.1
		LINC02582
		AC009630.2
		AC008443.3
		AC015712.6
		C3orf67-AS1
		LINC02417
		AC025524.2
		AF015262.1
		AC013391.3
		TBL1XR1-AS1
		AC090627.1
		PVT1
		FOXD3-AS1
		AL136018.1
		AC026336.3
		AC106799.3
		TRPM2-AS
		AC106799.1
		AC003092.1
		AC008060.4
		LINC01224
		AC010789.1
		AL365181.3
		AC209154.2
		LINC00871
		AC132807.2
		AP000696.1
		LINC01873
		LINC01956
		LINC00973
		AF121898.1
		AC068985.1
		AL355483.1
		AC012506.3
		AL445531.1
		HOTTIP
		AC074237.1
		AP005137.2
		LINC02307
		AC096759.2
		LINC00470
		MAGEA4-AS1
		AL445471.1
		LINC02208
		AC125603.2
		AC010967.1
		AL138759.1
		AC129926.1
		ERVH48-1
		AC126407.1
		AC025244.1
		LINC02315
		AL590708.1
		AC092625.1
		AL157373.2
		SMCR2
		AL844175.1
		AC090568.2
		FOXC2-AS1
		AP001360.2
		AC126768.3
		AC022568.1
		AC145207.8
		AC026116.1
		LINC01467
		AC020611.2
		LINC00520
		TCL6
		AC078906.1
		LINC01491
		AC018716.2
		AL136172.1
		AC109479.1
		AC005042.2
		AL135924.2
		AC245884.9
		AC091170.1
		AL132655.2
		LINC02125
		AL139246.1
		AC021504.1
		AC073529.1
		AC006487.1
		AC022039.1
		LINC02137
		AL033381.2
		AC007375.3
		AC104126.1
		FAM239C
		LINC01198
		AC055874.1
		AL592486.1
		LINC01370
		AC023481.1
		AC087318.1
		AL359792.1
		TTTY20
		AC034154.1
		AC007923.1
		AC012355.1
		AL031674.1
		AL133419.1
		FRMD6-AS1
		TMPO-AS1
		AC090970.3
		LINC02502
		AC092422.1
		LINC02499
		AC109811.1
		AC024475.4
		GHET1
		AC011337.1
		AC099506.1
		LINC00837
		AL596330.1
		AC084149.1
		LINC02068
		HOXD-AS2
		AL139327.2
		AP001783.1
		LINC00381
		AC092957.1
		AC103923.1
		AC093083.1
		LINC01822
		AC099509.2
		AC099796.1
		AC012625.1
		AL391097.2
		SAMD12-AS1
		AC004875.1
		AC113194.1
		AC122710.2
		AL358334.2
		LINC01994
		AC073352.1
		AC018767.2
		GDNF-AS1
		LINC00851
		LINC00557
		AC025183.2
		AC007091.1
		AL512622.1
		AC020637.1
		ADARB2-AS1
		LINC01494
		AL356479.1
		AL356361.2
		AL365356.3
		AC115837.2
		LINC02551
		AC112484.3
		AL078590.1
		AL513318.2
		LINC02457
		FOXCUT
		LINC02393
		AC068025.1
		LINC01445
		C17orf77
		AP000851.1
		AC016730.1
		LINC01324
		LINC01605
		AC036176.3
		AC104663.1
		AC084211.1
		KCNIP4-IT1
		AL136162.1
		AL049870.2
		AL133353.1
		LINC02306
		LINC00613
		ELDR
		LINC02041
		AC027243.2
		UNC5B-AS1
		AL391069.4
		AC010997.5
		LINC02515
		LINC02261
		LEF1-AS1
		LINC01929
		LINC01063
		AL136309.3
		TBX18-AS1
		LINC01527
		LINC00408
		AC093274.1
		AC010271.2
		AC148477.3
		AL512604.2
		PEX5L-AS2
		AP000679.1
		AC010731.2
		MTUS2-AS1
		AC068473.4
		AC138356.3
		AC112518.1
		LINC01998
		TCF4-AS1
		LINC00928
		FSIP2-AS1
		AC022079.1
		NRG1-IT1
		TUSC7
		AC126696.1
		AC011453.1
		CACNA2D3-AS1
		AL357558.1
		LINC02031
		AC008708.1
		AL160162.1
		AL049536.1
		AC016737.1
		LINC01251
		LINC01549
		AL035458.2
		BLACE
		AP000688.1
		AC138965.1
		AC022387.1
		RRM1-AS1
		AL358115.1
		AL359771.1
		LINC02225
		AC023158.2
		LINC00391
		AC007953.2
		TM4SF1-AS1
		AL590617.2
		AL161937.2
		AC090912.3
		AL023803.3
		AL358332.1
		LINC02575
		AP001042.1
		AL121580.1
		FMR1-AS1
		SH3PXD2A-AS1
		KCNH1-IT1
		MIR2117HG
		AC009271.1
		AC008114.1
		LINC01077
		AC020658.3
		LINC00379
		LINC02542
		LINC00504
		LNX1-AS1
		AP001208.1
		AL161645.1
		AC103855.3
		AJ003147.1
		LINC01440
		AL356277.3
		EVX1-AS
		BX322234.2
		LINC01139
		AC104009.1
		AC009117.3
		LINC01162
		AL161757.5
		AC004053.1
		LINC00320
		AL354766.2
		AC023034.2
		AC011840.1
		AL451050.2
		AC093496.1
		MELTF-AS1
		AC004920.1
		AC126768.2
		LINC01182
		AC007907.1
		LINC02501
		Z83851.1
		AL390719.2
		AL163952.1
		AC044839.4
		AL049649.1
		AC019068.1
		AL355095.1
		AC021351.1
		AC010280.1
		AC091820.1
		AC126175.1
		AL122058.1
		AC244230.1
		LINC01995
		C12orf77
		AL135787.1
		LINC01254
		AC003001.1
		LINC01258
		AC073321.1
		AC092669.1
		AP001476.3
		LINC02528
		AL139039.3
		AC125494.3
		AL162574.2
		LINC00523
		AC112693.1
		AC090403.1
		LINC00992
		AP001208.2
		LINC02170
		AC023906.2
		AC022405.1
		AC006019.1
		AC010395.1
		LIVAR
		AC036108.4
		AC078860.1
		AC113189.4
		LINC00970
		LINC01850
		FTCD-AS1
		AL031848.1
		SLC7A11-AS1
		AC105137.2
		AC116614.1
		GATA3-AS1
		LINC01752
		LINC01805
		AC114956.1
		AC106798.1
		AC008464.1
		ROCR
		AL445673.1
		AL162725.2
		AC067863.1
		AC090791.1
		LINC00640
		MYHAS
		AL589684.1
		AC018695.2
		AC093802.2
		AC108002.3
		LINC01153
		LINC01413
		AL355607.1
		DSCR9
		AL358613.2
		IGF2BP2-AS1
		AC106895.1
		AC015660.1
		AC093865.1
		AC114485.1
		AC007996.1
		LINC01918
		AL023803.2
		LINC01193
		LINC02392
		AL110292.1
		AC010907.2
		AC079943.2
		AC009292.1
		AC012447.1
		AL359924.1
		AC026401.3
		AC010148.1
		LINC01647
		AC025284.1
		LINC01606
		AL034397.2
		KCNAB1-AS2
		AC025219.1
		AL137804.1
		AC004990.1
		AL592182.2
		LINC00836
		AC117394.2
		AC121764.1
		AC006305.1
		AL355483.3
		LINC02076
		AC005906.2
		AP003469.1
		AC096719.1
		AC089987.2
		AP005203.1
		DDR1-DT
		C8orf49
		AP000439.3
		AL162457.2
		AL136088.1
		AC068875.1
		AL157414.1
		AP003063.1
		AC022031.1
		LINC01598
		AC006262.3
		KIRREL3-AS1
		AC126177.4
		AL161757.4
		AC096543.2
		AC022509.1
		LINC02444
		CLSTN2-AS1
		PEX5L-AS1
		PTCSC2
		AC090371.2
		AC011005.4
		AP000864.1
		AC010980.2
		AC021683.3
		AP003071.2
		LINC01707
		AC010745.2
		AC078778.1
		LINC02012
		VENTXP1
		AL356299.2
		LINC00939
		LINC02212
		AC124254.1
		AL591222.1
		AC091153.3
		AC116609.3
		ATP6V1B1-AS1
		LINC01054
		AC008556.1
		AC009988.1
		AC084024.3
		LINC00404
		LINC01320
		AC087491.1
		AC005863.1
		AC019080.1
		FAM230B
		AC018716.1
		CYYR1-AS1
		BX119904.2
		AC009081.1
		AL355338.1
		XXYLT1-AS1
		AC010501.1
		LINC01639
		AL512380.1
		KDM4A-AS1
		AC005381.1
		LINC01905
		AC037486.1
		AC244502.3
		LINC00445
		AC012360.1
		LINC02119
		AP001011.1
		AC104564.4
		AC092130.1
		LINC01416
		AC008011.2
		AC105339.2
		LINC02063
		LINC02465
		AL161640.1
		AC108002.1
		LINC01405
		AC004817.4
		AC011369.1
		LINC01920
		AC009955.1
		AC027088.2
		LINC01749
		KAZN-AS1
		AC093627.1
		AC022075.1
		LINC00492
		AF130359.1
		LINC01592
		AJ003147.2
		AC104564.2
		LINC01127
		C15orf59-AS1
		AC099786.2
		AL589986.2
		AC016825.1
		AC009118.2
		AC140125.1
		LINC01117
		AC021785.1
		AL137026.2
		AC106779.1
		AL513283.1
		LINC02445
		AC023158.1
		AP000880.1
		AL160408.5
		LINC01203
		LINC00173
		AC023034.1
		AC004147.4
		MYCNUT
		LINC00303
		LINC01159
		LINC02232
		AC044839.3
		AC126768.1
		LINC01603
		PART1
		ESRG
		PSG8-AS1
		TLX1NB
		AC090679.1
		PCAT5
		Z83851.2
		AC122685.1
		LINC00701
		AC079070.1
		AC126177.8
		LINC01698
		AL121578.3
		LINC01632
		AL451062.1
		DLX2-DT
		AC120042.2
		FAM239A
		LINC02561
		AL356270.1
		AC073062.1
		AC068831.6
		AC016573.1
		AC007493.1
		AC098828.3
		AC091820.2
		AC019185.2
		AC091057.1
		AC073195.1
		AC055758.2
		MIR3681HG
		AL021877.2
		AL079301.1
		AL590226.2
		AL035425.3
		AC004835.1
		AC008403.3
		AC100872.1
		AC009123.1
		AL683887.1
		AL606970.4
		AC026495.1
		AL355303.1
		AL161908.1
		AL512785.1
		EWSAT1
		AF212831.1
		AP005209.1
		LINC01343
		AL359504.2
		AC120193.1
		LINC01361
		AC022140.1
		AP000721.2
		AC018616.1
		AC114956.2
		LINC01895
		LINC01289
		AC068633.1
		AC019064.1
		AC007991.3
		CU634019.6
		AC105460.2
		LINC00974
		AC018558.2
		LINC02066
		AC010491.1
		LINC02200
		LINC01228
		AC023511.1
		AC100839.1
		AC011498.3
		AL035258.1
		LINC01326
		LINC01160
		AC011601.1
		AL355990.2
		AL021807.1
		LINC02247
		MLIP-IT1
		AC103952.1
		LINC01015
		AC091138.1
		AC022294.1
		AC019080.4
		AC067956.1
		AC092336.1
		EMX2OS
		AC003986.3
		AC055736.1
		AL160286.3
		AC007126.1
		LINC01033
		AP003390.2
		AC026310.2
		AL121761.2
		AC092811.1
		AC138646.1
		AL355472.4
		LINC01887
		PARD3-AS1
		AL929601.1
		AL078590.2
		AP000820.1
		AC068196.1
		AC069431.1
		AC131094.1
		OGFRP1
		AC023310.4
		AC234772.2
		AC103808.3
		AC016888.1
		LINC02005
		AC087516.2
		LINC00462
		MIAT
		U95743.1
		AC131902.2
		AL009179.1
		AC018866.1
		AC009061.1
		LINC02583
		AL161636.1
		LINC00615
		AC022893.2
		KIRREL3-AS3
		LINC00237
		LINC01623
		LINC01280
		AP001065.2
		AC087894.2
		AL391704.1
		PLCH1-AS2
		AC010605.1
		AC096736.3
		AC084346.2
		LINC00703
		AP003119.2
		AL032819.1
		AC000032.1
		AC005329.1
		AP001476.1
		LINC00967
		AL357153.3
		AC007402.1
		AL449403.2
		AC109462.1
		AC097717.1
		AC092810.3
		UPK1A-AS1
		AC009501.1
		ELOVL2-AS1
		LINC01497
		AC007250.1
		MAPT-IT1
		AC093843.1
		AC012640.2
		AC092818.1
		AC023886.1
		AL845311.1
		LINC00302
		AC090912.1
		AC128709.1
		AC025183.3
		LINC01120
		AC097713.1
		AC100791.1
		AL109610.1
		LINC01602
		AC024132.2
		AC013652.2
		AC069439.2
		DARS-AS1
		GPR50-AS1
		AC084759.2
		AP001360.1
		AL122034.1
		LINC00885
		AC008278.1
		AL035425.1
		AP005229.2
		AC018695.6
		AC113355.1
		AC092335.1
		AC124276.1
		AC010913.1
		AC022075.2
		AC078842.1
		AC017100.1
		AC124067.2
		AL161630.1
		LINC01546
		AC104823.1
		AC010969.1
		HTR5A-AS1
		AC078802.1
		AC062015.1
		AC008687.2
		LINC01080
		AL117378.1
		AL118508.1
		AC016642.1
		AC007966.1
		AC004080.4
		ATP13A5-AS1
		LINC02434
		Z93403.1
		AC091946.1
		AC008663.1
		AC006450.3
		LINC02042
		LINC01989
		AC125603.4
		AL356740.3
		AL592309.2
		AC055758.1
		AC105177.1
		AC108868.2
		LINC02002
		AL109976.1
		AL034376.2
		AC019197.1
		LINC01666
		AP001790.1
		SLC12A5-AS1
		TEX41
		AC090735.1
		LINC00458
		SIX3-AS1
		AC131157.1
		AL354994.1
		AC027031.2
		AL132655.1
		AL158013.1
		LINC00052
		AC104041.1
		SOX2-OT
		AL049794.1
		AC044839.2
		LINC00556
		AC093599.1
		AC112907.1
		PAUPAR
		AL160412.1
		AC002511.1
		AC084706.1
		AC022535.1
		LINC01029
		LINC01505
		LINC00972
		AC100839.2
		AC090282.1
		LHX5-AS1
		AC080023.1
		AC097451.1
		AC073346.1
		LINC02382
		AC019080.3
		OSTM1-AS1
		LINC02301
		LINC01133
		AC107373.1
		LINC02511
		AF165147.1
		AC068473.3
		MIR205HG
		AL139424.1
		LINC01541
		AC009955.2
		LINC01901
		SLC9A3-AS1
		LINC00678
		WNT5A-AS1
		AL512625.2
		AC091729.1
		AL356010.2
		AL162384.1
		AL355472.3
		AC017083.1
		AC007540.1
		AC011374.1
		AC005162.2
		AC018781.1
		AL354864.1
		LINC02386
		AC116609.1
		AP002784.1
		AL122125.1
		LINC02071
		AC008708.2
		AL359513.1
		LINC01514
		AL353613.1
		AL033527.2
		AC013509.1
		ATP2A1-AS1
		LINC00661
		AF233439.1
		LINC00911
		LINC01173
		AL022316.1
		AC007249.1
		AC096570.1
		AC018953.1
		AL033384.1
		AC013640.1
		AC023403.1
		AL355482.2
		AC092783.1
		AC104071.1
		AC092142.1
		AP003680.1
		CYP4F26P
		AC092720.2
		U91319.1
		AP006545.2
		AC078955.1
		AC108515.1
		AC004852.2
		AP003119.3
		AC073429.2
		AC012354.1
		AC068631.1
		AL139246.4
		LINC02254
		AC083880.1
		AC106795.2
		CLEC12A-AS1
		AC007881.3
		AC097347.1
		AC018685.2
		LINC00534
		OVOL1-AS1
		LINC00581
		AC092167.1
		AC011474.1
		AC022762.1
		CASC11
		AC073957.1
		LINC01964
		SATB1-AS1
		AP003063.2
		AP005264.3
		AC083841.1
		AC018558.1
		LINC02269
		AC099786.1
		AC009118.1
		STEAP3-AS1
		AP000697.1
		AC092125.1
		LINC01630
		ADIPOQ-AS1
		AC099786.3
		AC022274.1
		LINC02541

## Sheet: tableS5
Names	Total	LncRNA
overlapping up-regulated lncRNAs in LUAD and LUSC	895	AC092115.3
		CASC20
		AC133785.1
		AC073578.1
		LINC02377
		KCNMB2-AS1
		PKP4-AS1
		AC006357.1
		AC005865.1
		FP236383.3
		AC099066.2
		AP003559.1
		AC093520.1
		AL589182.1
		AC012501.1
		BCAR4
		AL645608.7
		AC109588.1
		AL133153.2
		LINC01202
		LINC01731
		SALRNA1
		LINC00665
		AC080037.1
		AC108865.2
		AC022733.1
		LINC00698
		LINC00705
		AC009264.1
		BX005019.1
		LINC01346
		AC106875.1
		AL139023.1
		LINC02404
		LINC00460
		AC067930.5
		MAFA-AS1
		AL157931.1
		AC131009.2
		LINC02476
		LINC01701
		ST8SIA6-AS1
		AL353693.1
		LINC01429
		AC009275.1
		LINC02267
		AL391097.1
		LINC02152
		AC108174.1
		WASIR2
		LINC01574
		LINC01269
		LINC01876
		CU639417.4
		AP005233.2
		LINC02438
		CASC8
		AC141930.2
		LINC01971
		CDKN2A-DT
		DLX6-AS1
		FP325330.3
		AC117386.2
		LINC02588
		AC022201.1
		LINC01804
		AC002351.1
		AL157400.2
		AC008649.1
		U62317.2
		AC233280.1
		AC087855.2
		PAQR9-AS1
		RUNDC3A-AS1
		AL033397.1
		AL079303.1
		AL157778.1
		AL049555.1
		LINC02122
		AL592043.1
		AF127577.3
		AC005291.2
		AF279873.3
		TDRG1
		OTX2-AS1
		LINC01910
		MIR548XHG
		AC093904.4
		AC063926.1
		AC083967.1
		MNX1-AS1
		AC090809.1
		LINC01967
		AC023347.1
		AC073365.1
		FIRRE
		AC107419.1
		LINC01460
		AC087857.1
		AC012640.1
		AC100826.1
		ZFHX4-AS1
		AC025575.1
		AC112176.1
		LINC00682
		AC016550.2
		LINC00601
		AC007405.2
		MIR9-3HG
		AC087258.1
		AC060834.2
		CASC19
		AL583808.1
		AL109615.3
		AC027627.1
		LINC00629
		AL590666.3
		LINC01629
		AC022031.2
		UCA1
		AC099850.3
		AC021087.4
		AC093001.1
		AL355607.2
		LINC00887
		LINC02535
		AC006206.2
		AC005537.1
		LINC02506
		AC090578.1
		AC107308.1
		AC009262.1
		AC010307.2
		AL445072.1
		AC016723.1
		B3GALT5-AS1
		AC069277.1
		U47924.1
		AC103702.2
		AC024592.2
		LINC01206
		LINC01194
		CASC9
		AC036222.1
		LINC02560
		C11orf44
		AC022929.2
		AC016710.1
		AC074389.2
		AC008517.1
		LINC01345
		LINC01179
		AC073174.1
		AC093730.1
		AC026355.2
		AP003900.1
		AC084819.1
		AL160271.1
		AC019211.1
		AC021534.1
		AC023794.1
		LINC01456
		LINC00896
		AC005722.2
		AC011483.1
		FAM230C
		LINC01213
		AL390729.1
		AL121832.3
		LINC01205
		AL121904.1
		AC103740.2
		AC017048.3
		AF254983.1
		ZFPM2-AS1
		AP001574.1
		AC005330.1
		AC009139.1
		AP000525.1
		HOXC-AS3
		AC084816.1
		LINC01448
		AC023301.1
		AC105219.2
		TFAP2A-AS1
		AC015712.4
		MIR4527HG
		LINC02416
		SATB2-AS1
		AL512363.1
		LINC01776
		LINC02156
		AL033504.1
		AC015574.1
		C2orf48
		AL591501.1
		LINC01681
		AL365181.2
		AL390115.1
		LINC01098
		BBOX1-AS1
		AC131902.1
		AC005150.1
		AC010719.1
		AC006329.1
		AC007383.4
		NAALADL2-AS2
		AC004158.1
		AP003500.2
		HOTAIR
		AL049830.3
		LINC00536
		AC073316.1
		AL031058.1
		AC106772.1
		AC090502.1
		LINC01587
		AC007785.1
		Z97206.2
		AP001547.1
		AP003119.1
		DSCAM-AS1
		AC007731.1
		LINC02046
		AC083809.1
		LINC01393
		AC009646.2
		LINC01979
		AC099520.1
		BX324167.1
		AC092484.1
		LINC01468
		IGF2-AS
		AC079062.1
		AC091868.2
		AL133370.1
		AL513304.1
		AC007128.2
		AP001025.1
		LINC02525
		LINC02167
		AC125616.1
		AC090125.1
		AL049874.3
		LINC02313
		AC103409.1
		LINC02128
		AC061975.1
		MIR31HG
		AC090673.1
		AC122710.3
		AC078820.1
		LINC02428
		AL162411.1
		AC083841.2
		AC093904.3
		AC089983.1
		LINC01793
		LINC01968
		AC105999.2
		LINC00858
		AC122694.1
		AC025183.1
		AL596442.1
		AL691420.1
		AC003986.2
		LINC01615
		AC005064.1
		LINC01608
		LINC02448
		AL365356.4
		AC120498.4
		AC025211.1
		LINC00676
		AC025254.1
		AC108865.1
		AC024581.1
		AC087667.1
		AL136537.2
		DEPDC1-AS1
		AL133467.2
		FGF12-AS3
		LINC01833
		AL139393.1
		LINC02050
		AL022313.4
		LINC02223
		AL359313.1
		AL358394.1
		SOX1-OT
		TUSC8
		LINC00466
		LINC02065
		AC078923.1
		AC091987.1
		AC011352.3
		LINC02466
		LINC00659
		LINC02323
		AC005291.1
		AL023754.1
		AC027243.1
		BARX1-DT
		LINC01665
		LINC01687
		AC099487.1
		AP000527.1
		AC007848.1
		LINC01981
		AC008406.3
		AC109454.3
		LINC02505
		AC068305.2
		AL731684.1
		AC008109.1
		MANCR
		AL138789.1
		LSAMP-AS1
		AC006206.1
		AC097358.2
		DDX11-AS1
		AC080129.1
		AC133540.1
		AC139718.1
		AC113346.1
		LINC02584
		AC105118.1
		LINC01583
		LINC00184
		LINC02492
		LINC01192
		EPHA5-AS1
		AC016044.1
		LINC00456
		AC020907.1
		AC090673.2
		AC079160.1
		AC090503.2
		AL513164.1
		AL356364.1
		AL354707.1
		AL445524.1
		AC016205.1
		AC006372.1
		LINC01775
		SSTR5-AS1
		AC009065.5
		AC245100.6
		AC112178.1
		MIR4713HG
		LINC02522
		AL034399.2
		MRGPRG-AS1
		AC005256.1
		AC004080.2
		LINC01250
		PCAT7
		AC108025.2
		LINC01543
		AC068580.2
		MIR2052HG
		AP003390.1
		LINC02163
		AL365356.5
		AC105219.4
		EGLN3-AS1
		Z98257.1
		AC079466.1
		LINC01611
		AC112721.2
		AP000526.1
		LINC02473
		LINC01977
		LINC01158
		AC117402.1
		AC011298.1
		AL049539.1
		AP005328.1
		LINC01143
		AC111149.2
		AC106900.2
		RAPGEF4-AS1
		Z99943.1
		AC090023.2
		AP000851.2
		AL079307.1
		LINC01344
		PURPL
		LINC01885
		LINC00592
		STEAP2-AS1
		LINC01210
		PINCR
		LINC01980
		AC005722.3
		CLDN10-AS1
		LINC02348
		AC023824.5
		LINC00392
		LINC02293
		AP003174.1
		IL20RB-AS1
		U62317.1
		AC015522.1
		MIR137HG
		AC106785.2
		AL118505.1
		AL161431.1
		AC108676.1
		AL589740.1
		MAGEA10-MAGEA5
		ELFN1-AS1
		LHX1-DT
		LINC01257
		AL023755.1
		LINC00308
		KCNQ5-IT1
		AC010328.1
		AC104794.3
		AP003181.1
		AC061975.6
		AC004816.1
		AP000553.2
		SNHG4
		DGCR9
		POU6F2-AS1
		LINC00645
		LINC01419
		AFAP1-AS1
		DSCR8
		LINC00355
		AC004704.1
		AL136131.2
		AL049775.2
		AC034223.2
		FGF12-AS2
		LINC02418
		AC092803.1
		LINC02282
		MIR7-3HG
		AL138720.1
		AC019155.3
		DUXAP8
		AC012363.1
		LINC02043
		AC015818.2
		AC100791.2
		AL354719.2
		LINC01792
		G2E3-AS1
		AC134312.5
		AF131216.3
		AC093281.2
		CHODL-AS1
		CU104787.1
		LUARIS
		AC091133.2
		LINC00898
		AL356234.2
		ERVMER61-1
		LINC00941
		AC006262.2
		FAM83C-AS1
		SLC2A1-AS1
		LINC02303
		OVAAL
		AL121827.2
		AL008721.1
		LINC02109
		LINC00511
		AC009121.1
		LINC01385
		AC013652.1
		AC090192.2
		AC008060.1
		FAM83A-AS1
		AC053503.2
		LINC02477
		LINC02086
		MIR5689HG
		AC148477.4
		AC020551.1
		AC131532.1
		AL445209.1
		LINC01391
		AC090193.1
		MYOSLID
		AC020891.3
		AC006064.3
		LINC00958
		AL359551.1
		LINC02159
		LINC00337
		AC100782.1
		AC005307.1
		IGFL2-AS1
		AC026785.3
		AL353746.1
		AC106744.2
		LINC01116
		AC008115.2
		AC004221.1
		DPP10-AS1
		LINC02527
		LINC01564
		LINC01356
		HOXC-AS1
		LINC01703
		LINC01572
		AL162413.1
		AC114812.2
		NPSR1-AS1
		AC110285.6
		AC016687.3
		AC114912.1
		AL138962.1
		AC090774.3
		LINC00862
		LINC01214
		AC006946.2
		LINC02003
		LINC01614
		SPATA3-AS1
		AL160408.4
		LINC00626
		AC005186.1
		AL354993.1
		AC073323.1
		AC068228.1
		ARNTL2-AS1
		AL391361.3
		AC020934.1
		VPS9D1-AS1
		AP000904.1
		AC055717.2
		LINC00525
		AC022784.3
		AL133325.3
		LINC01322
		AC002378.1
		AL033397.2
		HOXA10-AS
		LINC01886
		AC003958.2
		AL606970.1
		SCHLAP1
		LINP1
		LINC02387
		LINC02437
		AP000439.2
		AL008638.2
		LINC00051
		AC010099.4
		MYCNOS
		PCAT6
		AC025166.1
		AC027228.2
		AC011287.2
		AL109761.1
		AC012213.1
		AP000997.2
		AP005328.2
		AC092920.1
		AC004888.1
		LINC01470
		AC010327.3
		LINC01976
		AL021395.1
		AC013731.1
		AC024560.1
		DIO2-AS1
		AC010595.1
		AL359851.1
		FAM222A-AS1
		HOXB-AS4
		LINC02544
		AC083973.1
		LINC01819
		TTLL11-IT1
		H19
		LINC01924
		AC021683.2
		TMEM132D-AS1
		AL391152.1
		LINC00393
		AC020928.2
		LINC01667
		AC040174.1
		AC010735.1
		HAGLROS
		LINC02188
		LINC02178
		AC109830.1
		SMILR
		AC006065.4
		AC007128.1
		LINC02327
		AC026250.1
		LINC02105
		AL133215.2
		AC123768.1
		AL022324.3
		AC116049.2
		AC040174.2
		LINC00488
		AC116666.1
		AC026462.3
		DANT1
		FEZF1-AS1
		AC114316.2
		AC112236.1
		AL589743.5
		LINC01425
		LINC01807
		AC011611.2
		AC034206.1
		AL109924.2
		LINC01249
		AC010894.3
		AC114489.1
		AC083801.2
		AL138974.1
		AC007848.2
		AC012531.1
		AL035252.2
		AC107886.1
		AC092916.1
		AC106771.1
		AL662890.1
		AC116025.2
		LINC01812
		AL136298.1
		DSG1-AS1
		AC024230.1
		AC005993.1
		AC007159.1
		LINC01511
		LINC01561
		AC023421.1
		AL133372.2
		AC091182.2
		LINC02253
		AP000251.1
		LINC00519
		LINC01559
		PLUT
		LINC02014
		AC106799.2
		LINC02310
		LINC00319
		AC006262.1
		LINC01711
		AL031658.2
		AC126696.3
		AC093515.1
		AC093702.1
		HOXC13-AS
		AC122710.1
		LINC01633
		AF106564.1
		AC002076.1
		AC007639.1
		AC008750.3
		AP000997.1
		AC090826.1
		AC006145.1
		LINC02141
		HOXA11-AS
		AC016877.3
		AP002478.1
		APCDD1L-DT
		AP003500.1
		AC093833.1
		AC090116.1
		LINC01305
		AC093904.2
		LINC01842
		AC098936.1
		AC004009.1
		LINC02443
		AC122134.1
		LINC01287
		RBAKDN
		LINC00200
		AL445647.1
		LINC02081
		BLACAT1
		AC011700.1
		AL133467.4
		C10orf91
		AL590644.1
		LINC01087
		AL596223.1
		AP001453.2
		AC034223.1
		LINC01524
		AC106744.1
		SNHG27
		AC128689.1
		AC004034.1
		LINC00867
		AL122008.3
		AC138904.1
		AL645608.9
		LINC00383
		AC137834.2
		AC022784.8
		AC020891.2
		LINC02335
		MIR4300HG
		LINC01518
		C5orf66-AS1
		AC087612.1
		AL512488.1
		LINC02111
		AL139385.1
		AC110015.1
		PCAT18
		AC002463.1
		AL160408.1
		AC092447.5
		AL138902.1
		AC004870.2
		AP000424.1
		AC123905.1
		AL354824.2
		LINC00491
		LINC00461
		LINC02562
		AC091057.4
		AC022639.1
		LINC01096
		AC090502.3
		AC015849.5
		GRM5-AS1
		AL136221.1
		LINC00942
		LINC02008
		AC022784.1
		AC138305.1
		AC087473.1
		LINC01411
		AL117329.1
		AC135782.1
		AC009097.2
		LINC00221
		AL391427.1
		AC097512.1
		AC100801.1
		AC112493.1
		AC069061.2
		LINC02321
		AC138761.3
		SOX21-AS1
		AP000842.3
		FER1L6-AS2
		AL109954.2
		LINC01475
		LINC01697
		AC011287.1
		LINC01208
		SLC12A9-AS1
		AL138760.1
		AC104088.1
		LINC00707
		AC007389.3
		AP005230.1
		MIR124-2HG
		AL513123.1
		LINC02475
		AL645608.3
		CALML3-AS1
		AC105460.1
		HOXC-AS2
		LINC00501
		AC246793.1
		DSCR4
		ABCA9-AS1
		AC025575.2
		AC010478.1
		LINC01992
		CR392039.3
		AC109439.2
		AC012213.4
		AC012174.1
		AC020658.4
		AC093895.1
		AC010343.3
		AC108136.1
		AL122019.1
		LINC02055
		GACAT2
		LINC02048
		LINC02454
		LINC00668
		AC148477.2
		AC012339.1
		AC091179.1
		AL121772.1
		LINC01705
		LINC02196
		AC010168.1
		CYP4A22-AS1
		AC090709.1
		LINC01854
		POU6F2-AS2
		AC114296.1
		AC023824.3
		LINC00518
		AP003469.2
		LINC01446
		LINC02241
		AL139042.1
		AL354824.1
		AC114803.1
		AL590666.2
		AC008083.1
		AC011352.1
		LINC01551
		AC069120.1
		LINC01748
		AC010275.1
		AL139412.1
		AL163953.1
		LINC00628
		LINC02484
		AC124290.1
		AL139002.1
		AC104793.1
		LINC01297
		AP003721.1
		LINC01896
		AC084864.1
		AC023824.1
		AC096669.1
		LINC01234
		IDH2-DT
		LINC00648
		SAMMSON
		AL354993.2
		KC877982.1
		AC011632.1
		LINC02582
		AC009630.2
		AC008443.3
		AC015712.6
		C3orf67-AS1
		LINC02417
		AC025524.2
		AF015262.1
		AC013391.3
		TBL1XR1-AS1
		AC090627.1
		PVT1
		FOXD3-AS1
		AL136018.1
		AC026336.3
		AC106799.3
		TRPM2-AS
		AC106799.1
		AC003092.1
		AC008060.4
		LINC01224
		AC010789.1
		AL365181.3
		AC209154.2
		LINC00871
		AC132807.2
		AP000696.1
		LINC01873
		LINC01956
		LINC00973
		AF121898.1
		AC068985.1
		AL355483.1
		AC012506.3
		AL445531.1
		HOTTIP
		AC074237.1
		AP005137.2
		LINC02307
		AC096759.2
		LINC00470
		MAGEA4-AS1
		AL445471.1
		LINC02208
		AC125603.2
		AC010967.1
		AL138759.1
		AC129926.1
		ERVH48-1
		AC126407.1
		AC025244.1
		LINC02315
		AL590708.1
