# Supplementary material for: Competing endogenous RNA (ceRNA) hypothetic model based on comprehensive analysis of long non-coding RNA expression in lung adenocarcinoma
Source: PeerJ. 2019 Nov 7;7:e8024. doi: 10.7717/peerj.8024 (PMC6842565; doi:10.7717/peerj.8024)
Supplement: Supplemental Information 6 [file peerj-07-8024-s006.xlsx]

## Sheet: Table S7
Samples	Wether they smoke	number of lesions	pathology	lymph node metastasis	tumor stage
1	no	1	well-differentiated adenocarcinoma	no	1a
2	no	1	invasive adenocarcinoma	no	1b
3	yes (30 years)	1	well-differentiated adenocarcinoma	no	1b
4	no	1	moderately differentiated adenocarcinoma	yes	3a
5	yes (30 years)	1	moderately differentiated adenocarcinoma	no	2a
6	yes (25 years)	1	invasive adenocarcinoma	no	1a
7	no	1	well-differentiated adenocarcinoma	no	1b
8	yes (20 years)	1	poor-differentiated adenocarcinoma	no	1a
9	yes (30 years)	1	poor-differentiated squamous cell carcinoma	yes	2b
10	yes (20 years)	1	moderately differentiated squamous cell carcinoma	no	2b
11	yes (40 years)	1	moderately differentiated adenocarcinoma	yes	2b
12	yes (20 years)	1	poor-differentiated squamous cell carcinoma	no	1a
13	no	1	poor-differentiated squamous cell carcinoma	no	2b
14	yes (40 years)	1	invasive adenocarcinoma	no	1a
15	yes (30 years)	1	poor-differentiated adenocarcinoma	yes	3a
16	no	1	Intestinal-type adenocarcinoma	no	1b
17	no	1	invasive adenocarcinoma	yes	3b
18	yes (50 years)	1	invasive adenocarcinoma	no	1a
19	no	1	invasive adenocarcinoma	no	1a
20	no	1	well-differentiated adenocarcinoma	yes	2b
21	yes (30 years)	1	poor-differentiated squamous cell carcinoma	yes	3a
22	no	1	well-differentiated adenocarcinoma	yes	2b
23	no	1	moderately differentiated adenocarcinoma	yes	3b
24	yes (10 years)	1	well-differentiated adenocarcinoma	no	2b
25	no	1	invasive adenocarcinoma	yes	3a
26	yes (30 years)	1	invasive adenocarcinoma	no	1a
27	yes (40 years)	1	invasive adenocarcinoma	yes	2b
28	yes (40 years)	1	well-differentiated adenocarcinoma	no	1a
29	no	1	poor-differentiated adenocarcinoma	yes	3a
30	yes (30 years)	1	poor-differentiated adenocarcinoma	yes	3b
31	yes (30 years)	1	poor-differentiated adenocarcinoma	no	1a
32	yes (10 years)	1	invasive adenocarcinoma	no	1a
33	yes (40 years)	1	moderately differentiated squamous cell carcinoma	yes	3b
34	no	1	poor-differentiated adenocarcinoma	no	1a
35	yes (40 years)	1	moderately differentiated squamous cell carcinoma	yes	3b
36	no	1	moderately differentiated adenocarcinoma	yes	3b
37	yes (30 years)	1	moderately differentiated squamous cell carcinoma	yes	3a
38	no	1	poor-differentiated adenocarcinoma	yes	3a
39	yes (10 years)	1	moderately differentiated squamous cell carcinoma	yes	3a
40	no	1	moderately differentiated adenocarcinoma	yes	2b
41	no	1	invasive adenocarcinoma	no	1a
42	no	1	moderately differentiated squamous cell carcinoma	no	1a
43	no	1	moderately differentiated squamous cell carcinoma (non-keratinizing)	no	3a
44	no	1	invasive adenocarcinoma	no	1A
45	no	1	invasive adenocarcinoma	no	1A
46	no	2	well-differentiated adenocarcinoma	no	3A
47	yes (40 years)	1	moderately differentiated squamous cell carcinoma	no	1A
48	no	1	moderately differentiated squamous cell carcinoma	no	1A
49	no	1	moderately differentiated adenocarcinoma	yes	3A
50	no	1	moderately differentiated adenocarcinoma	no	1B
51	yes (50 years)	1	moderately differentiated squamous cell carcinoma	no	1a
52	no	1	moderately differentiated squamous cell carcinoma	no	1a
53	no	1	poor-differentiated adenocarcinoma	yes	4
54	no	2	well-differentiated adenocarcinoma	yes	3b
55	yes (50 years)	1	moderately differentiated squamous cell carcinoma	no	1a
56	no	1	well-differentiated adenocarcinoma	yes	2b
57	no	1	moderately differentiated adenocarcinoma	yes	2b
58	no	1	moderately differentiated squamous cell carcinoma	yes	3a
59	no	2	well-differentiated adenocarcinoma	yes	3b
