# Supplementary material for: Competing endogenous RNA (ceRNA) hypothetic model based on comprehensive analysis of long non-coding RNA expression in lung adenocarcinoma
Source: PeerJ. 2019 Nov 7;7:e8024. doi: 10.7717/peerj.8024 (PMC6842565; doi:10.7717/peerj.8024)
Supplement: Supplemental Information 7 [file peerj-07-8024-s007.xlsx]

## Sheet: Table S8
source	type	target
hsa-miR-6515-3p
hsa-miR-6515-3p	1	ZNF99
hsa-miR-6515-3p	1	SAGE1
hsa-miR-6515-3p	1	DST
hsa-miR-6515-3p	1	ZKSCAN2
hsa-miR-6515-3p	1	RSF1
hsa-miR-6515-3p	1	ZNF208
hsa-miR-6515-3p	1	C15orf65
hsa-miR-6515-3p	1	SLCO1A2
hsa-miR-6515-3p	1	RIC3
hsa-miR-6515-3p	1	RPL36AL
hsa-miR-6515-3p	1	MRPS35
hsa-miR-6515-3p	1	CIR1
hsa-miR-6515-3p	1	GTF2A2
hsa-miR-6515-3p	1	ZNF638
hsa-miR-6515-3p	1	NAP1L5
hsa-miR-6515-3p	1	POTEE
hsa-miR-6515-3p	1	TMEM126B
hsa-miR-6515-3p	1	ERC1
hsa-miR-6515-3p	1	RIT2
hsa-miR-6515-3p	1	ZNF721
hsa-miR-6515-3p	1	MAGEB6
hsa-miR-6515-3p	1	CEP85L
hsa-miR-6515-3p	1	AC135178.1
hsa-miR-6515-3p	1	AC006946.15
hsa-miR-6515-3p	1	MOCS2
hsa-miR-6515-3p	1	C22orf46
hsa-miR-6515-3p	1	OR12D3
hsa-miR-6515-3p	1	H2BFWT
hsa-miR-6515-3p	1	CEP63
hsa-miR-6515-3p	1	DDT
hsa-miR-6515-3p	1	VAPB
hsa-miR-6515-3p	1	CEMP1
hsa-miR-6515-3p	1	GRIN2B
hsa-miR-6515-3p	1	TFRC
hsa-miR-6515-3p	1	HIST1H2AC
hsa-miR-6515-3p	1	ENKUR
hsa-miR-6515-3p	1	MOG
hsa-miR-6515-3p	1	GPR139
hsa-miR-6515-3p	1	XIRP2
hsa-miR-6515-3p	1	ARL3
hsa-miR-6515-3p	1	PAGR1
hsa-miR-6515-3p	1	LACC1
hsa-miR-6515-3p	1	EPB41
hsa-miR-6515-3p	1	CLEC5A
hsa-miR-6515-3p	1	ZNF441
hsa-miR-6515-3p	1	PGLYRP4
hsa-miR-6515-3p	1	PDLIM5
hsa-miR-6515-3p	1	TOMM5
hsa-miR-6515-3p	1	MPC1
hsa-miR-6515-3p	1	KLRK1
hsa-miR-6515-3p	1	C18orf56
hsa-miR-6515-3p	1	DDC
hsa-miR-6515-3p	1	GNG2
hsa-miR-6515-3p	1	SNX27
hsa-miR-6515-3p	1	ZNF605
hsa-miR-6515-3p	1	MIS18A
hsa-miR-6515-3p	1	ZNF66
hsa-miR-6515-3p	1	ZNF117
hsa-miR-6515-3p	1	SH3BGRL
hsa-miR-6515-3p	1	RWDD4
hsa-miR-6515-3p	1	CBX3
hsa-miR-6515-3p	1	SPTSSB
hsa-miR-6515-3p	1	PLN
hsa-miR-6515-3p	1	AKR1D1
hsa-miR-6515-3p	1	PRLHR
hsa-miR-6515-3p	1	ZNF121
hsa-miR-6515-3p	1	ATG4C
hsa-miR-6515-3p	1	ZNF667
hsa-miR-6515-3p	1	TMEM70
hsa-miR-6515-3p	1	BOD1L1
hsa-miR-6515-3p	1	RP11-113D6.6
hsa-miR-6515-3p	1	MRPS18B
hsa-miR-6515-3p	1	IL7R
hsa-miR-6515-3p	1	IL17RD
hsa-miR-6515-3p	1	CCDC23
hsa-miR-6515-3p	1	MTERFD1
hsa-miR-6515-3p	1	CYP2A7
hsa-miR-6515-3p	1	SRSF4
hsa-miR-6515-3p	1	ZNF589
hsa-miR-6515-3p	1	C12orf79
hsa-miR-6515-3p	1	ZNF146
hsa-miR-6515-3p	1	CLSPN
hsa-miR-6515-3p	1	ZNF225
hsa-miR-6515-3p	1	SMIM8
hsa-miR-6515-3p	1	GULP1
hsa-miR-6515-3p	1	ST6GALNAC3
hsa-miR-6515-3p	1	PIGR
hsa-miR-6515-3p	1	MCFD2
hsa-miR-6515-3p	1	CYP2A6
hsa-miR-6515-3p	1	THEMIS
hsa-miR-6515-3p	1	MRPL43
hsa-miR-6515-3p	1	CH25H
hsa-miR-6515-3p	1	MYOCD
hsa-miR-6515-3p	1	EXTL2
hsa-miR-6515-3p	1	GCA
hsa-miR-6515-3p	1	ZNF655
hsa-miR-6515-3p	1	FAM221B
hsa-miR-6515-3p	1	RNH1
hsa-miR-6515-3p	1	DKFZP434O1614
hsa-miR-6515-3p	1	SDPR
hsa-miR-7110-3p
hsa-miR-7110-3p	1	TNFRSF13B
hsa-miR-7110-3p	1	TVP23C
hsa-miR-7110-3p	1	CD300E
hsa-miR-7110-3p	1	C17orf105
hsa-miR-7110-3p	1	EMX2
hsa-miR-7110-3p	1	PITPNM3
hsa-miR-7110-3p	1	SLC9A3R2
hsa-miR-7110-3p	1	PDGFA
hsa-miR-7110-3p	1	ZNF233
hsa-miR-7110-3p	1	FCRL4
hsa-miR-7110-3p	1	ZBTB7A
hsa-miR-7110-3p	1	ONECUT3
hsa-miR-7110-3p	1	ATP6AP1L
hsa-miR-7110-3p	1	ZNF525
hsa-miR-7110-3p	1	TBX5
hsa-miR-7110-3p	1	C22orf46
hsa-miR-7110-3p	1	FBXL16
hsa-miR-7110-3p	1	IRX5
hsa-miR-7110-3p	1	CXorf24
hsa-miR-7110-3p	1	RREB1
hsa-miR-7110-3p	1	SHOX
hsa-miR-7110-3p	1	THRA
hsa-miR-7110-3p	1	ELAVL3
hsa-miR-7110-3p	1	PAGR1
hsa-miR-7110-3p	1	F7
hsa-miR-7110-3p	1	WSCD2
hsa-miR-7110-3p	1	LSAMP
hsa-miR-7110-3p	1	SOST
hsa-miR-7110-3p	1	BHLHE22
hsa-miR-7110-3p	1	ZNF23
hsa-miR-7110-3p	1	OLIG3
hsa-miR-7110-3p	1	CALN1
hsa-miR-7110-3p	1	MC2R
hsa-miR-7110-3p	1	ZNF528
hsa-miR-7110-3p	1	PEA15
hsa-miR-7110-3p	1	PLA2G7
hsa-miR-7110-3p	1	C10orf131
hsa-miR-7110-3p	1	SMTNL2
hsa-miR-7110-3p	1	POLR2J3
hsa-miR-7110-3p	1	AR
hsa-miR-7110-3p	1	SIGLEC15
hsa-miR-7110-3p	1	DPF3
hsa-miR-7110-3p	1	TMPRSS4
hsa-miR-7110-3p	1	SHOX2
hsa-miR-7110-3p	1	PPP6R1
hsa-miR-7110-3p	1	STAT5A
hsa-miR-7110-3p	1	UPK3BL
hsa-miR-7110-3p	1	CD3E
hsa-miR-7110-3p	1	CCL16
hsa-miR-7110-3p	1	ZSCAN12
hsa-miR-7110-3p	1	KRT26
hsa-miR-7110-3p	1	KCNA4
hsa-miR-7110-3p	1	ZNF286B
hsa-miR-7110-3p	1	ZDHHC22
hsa-miR-7110-3p	1	Z98049.1
hsa-miR-7110-3p	1	TTF1
hsa-miR-7110-3p	1	RDX
hsa-miR-7110-3p	1	REP15
hsa-miR-7110-3p	1	TBL2
hsa-miR-7110-3p	1	HRH1
hsa-miR-7110-3p	1	ASAH2B
hsa-miR-7110-3p	1	ZNF514
hsa-miR-7110-3p	1	PLEKHA6
hsa-miR-7110-3p	1	DLX6
hsa-miR-7110-3p	1	POLR2J2
hsa-miR-7110-3p	1	AICDA
hsa-miR-7110-3p	1	ZNF844
hsa-miR-7110-3p	1	HELLS
hsa-miR-7110-3p	1	OMP
hsa-miR-7110-3p	1	GPATCH11
hsa-miR-7110-3p	1	ZNF26
hsa-miR-7110-3p	1	DISC1
hsa-miR-7110-3p	1	PLA2G2F
hsa-miR-7110-3p	1	MPZ
hsa-miR-7110-3p	1	C3orf72
hsa-miR-7110-3p	1	KIF1C
hsa-miR-7110-3p	1	TLCD2
hsa-miR-7110-3p	1	ZNF286A
hsa-miR-7110-3p	1	CTRC
hsa-miR-7110-3p	1	SFTA3
hsa-miR-7110-3p	1	CD86
hsa-miR-7110-3p	1	CLNK
hsa-miR-7110-3p	1	CDH8
hsa-miR-7110-3p	1	LYSMD3
hsa-miR-7110-3p	1	HDAC3
hsa-miR-7110-3p	1	ZNF616
hsa-miR-7110-3p	1	PLCL1
hsa-miR-7110-3p	1	ZNF655
hsa-miR-7110-3p	1	PGF
hsa-miR-7110-3p	1	LACC1
hsa-miR-7110-3p	1	FAM102B
hsa-miR-7110-3p	1	DIRAS1
hsa-miR-7110-3p	1	COQ3
hsa-miR-7110-3p	1	GNGT1
hsa-miR-7110-3p	1	UNC13A
hsa-miR-7110-3p	1	BTN2A2
hsa-miR-7110-3p	1	ZNF225
hsa-miR-7110-3p	1	KIAA0907
hsa-miR-7110-3p	1	RPL37
hsa-miR-7110-3p	1	NCR2
hsa-miR-765
hsa-miR-765	1	PDX1
hsa-miR-765	1	AL133373.1
hsa-miR-765	1	FLJ00104
hsa-miR-765	1	LMLN
hsa-miR-765	1	CACNG7
hsa-miR-765	1	KLK4
hsa-miR-765	1	LHPP
hsa-miR-765	1	POU2F2
hsa-miR-765	1	NOVA2
hsa-miR-765	1	ZNF444
hsa-miR-765	1	APOC2
hsa-miR-765	1	CLPSL1
hsa-miR-765	1	LILRA6
hsa-miR-765	1	KCND1
hsa-miR-765	1	URM1
hsa-miR-765	1	PLP2
hsa-miR-765	1	WIPF2
hsa-miR-765	1	CD164L2
hsa-miR-765	1	NRBP2
hsa-miR-765	1	FAM169B
hsa-miR-765	1	KIAA0513
hsa-miR-765	1	GALP
hsa-miR-765	1	PCDHGB4
hsa-miR-765	1	PCDHGB3
hsa-miR-765	1	PRR13
hsa-miR-765	1	KRT80
hsa-miR-765	1	DBNDD2
hsa-miR-765	1	RUNX1T1
hsa-miR-765	1	PDE4A
hsa-miR-765	1	CASP14
hsa-miR-765	1	SH3BGRL3
hsa-miR-765	1	FAIM2
hsa-miR-765	1	TOR2A
hsa-miR-765	1	C9orf171
hsa-miR-765	1	ZBTB16
hsa-miR-765	1	VAMP2
hsa-miR-765	1	LYRM9
hsa-miR-765	1	KLK12
hsa-miR-765	1	CCL14
hsa-miR-765	1	PCDHGA11
hsa-miR-765	1	PPT2
hsa-miR-765	1	C12orf36
hsa-miR-765	1	NCR3LG1
hsa-miR-765	1	NDEL1
hsa-miR-765	1	GRIN2B
hsa-miR-765	1	XKR4
hsa-miR-765	1	CAMTA2
hsa-miR-765	1	TNR
hsa-miR-765	1	PCDHGB2
hsa-miR-765	1	PCDHGA4
hsa-miR-765	1	FARSB
hsa-miR-765	1	HNF4A
hsa-miR-765	1	DAD1
hsa-miR-765	1	CPLX1
hsa-miR-765	1	GPR107
hsa-miR-765	1	SSH2
hsa-miR-765	1	C1orf226
hsa-miR-765	1	ZNF784
hsa-miR-765	1	HEYL
hsa-miR-765	1	KIF21B
hsa-miR-765	1	BRD4
hsa-miR-765	1	C8orf56
hsa-miR-765	1	FAM102A
hsa-miR-765	1	SLC38A7
hsa-miR-765	1	TRPV2
hsa-miR-765	1	WNT4
hsa-miR-765	1	DLX3
hsa-miR-765	1	AIF1
hsa-miR-765	1	TACR1
hsa-miR-765	1	C15orf56
hsa-miR-765	1	B3GALT5
hsa-miR-765	1	TRIM67
hsa-miR-765	1	CDYL2
hsa-miR-765	1	PLA2G5
hsa-miR-765	1	DPF2
hsa-miR-765	1	ZFHX2
hsa-miR-765	1	TMEM233
hsa-miR-765	1	C15orf43
hsa-miR-765	1	CCL4
hsa-miR-765	1	SERP2
hsa-miR-765	1	RSPO4
hsa-miR-765	1	BASP1
hsa-miR-765	1	NDUFA4L2
hsa-miR-765	1	EFCC1
hsa-miR-765	1	SOCS3
hsa-miR-765	1	CD34
hsa-miR-765	1	TSPAN14
hsa-miR-765	1	RP11-422N16.3
hsa-miR-765	1	SYPL2
hsa-miR-765	1	PAX2
hsa-miR-765	1	ARAF
hsa-miR-765	1	PHF7
hsa-miR-765	1	DVL2
hsa-miR-765	1	TMEM164
hsa-miR-765	1	VAMP1
hsa-miR-765	1	HLA-DQA1
hsa-miR-765	1	ZNF703
hsa-miR-765	1	ACP2
hsa-miR-765	1	CYB561D1
hsa-miR-765	1	TBC1D29

## Sheet: Table S9
source	type	target
hsa-miR-1207-5p
hsa-miR-1207-5p	1	AL133373.1
hsa-miR-1207-5p	1	LHPP
hsa-miR-1207-5p	1	SIX5
hsa-miR-1207-5p	1	CSRP1
hsa-miR-1207-5p	1	THEM5
hsa-miR-1207-5p	1	FLJ45079
hsa-miR-1207-5p	1	NFAM1
hsa-miR-1207-5p	1	TMEM201
hsa-miR-1207-5p	1	2019-09-09
hsa-miR-1207-5p	1	DMBX1
hsa-miR-1207-5p	1	C17orf103
hsa-miR-1207-5p	1	SH3GLB2
hsa-miR-1207-5p	1	PIRT
hsa-miR-1207-5p	1	WNT9A
hsa-miR-1207-5p	1	C10orf91
hsa-miR-1207-5p	1	MAFG
hsa-miR-1207-5p	1	INF2
hsa-miR-1207-5p	1	CTXN1
hsa-miR-1207-5p	1	CHPF
hsa-miR-1207-5p	1	KSR2
hsa-miR-1207-5p	1	C19orf54
hsa-miR-1207-5p	1	TMEM229B
hsa-miR-1207-5p	1	TPRN
hsa-miR-1207-5p	1	KIF21B
hsa-miR-1207-5p	1	PCBP3
hsa-miR-1207-5p	1	XKR7
hsa-miR-1207-5p	1	FAM83F
hsa-miR-1207-5p	1	NPTXR
hsa-miR-1207-5p	1	ARC
hsa-miR-1207-5p	1	TFE3
hsa-miR-1207-5p	1	WDTC1
hsa-miR-1207-5p	1	SLC22A8
hsa-miR-1207-5p	1	TPPP3
hsa-miR-1207-5p	1	SLC7A8
hsa-miR-1207-5p	1	MPP2
hsa-miR-1207-5p	1	CRAT
hsa-miR-1207-5p	1	CD7
hsa-miR-1207-5p	1	C9orf170
hsa-miR-1207-5p	1	ARHGAP19-SLIT1
hsa-miR-1207-5p	1	CHEK1
hsa-miR-1207-5p	1	FBXO41
hsa-miR-1207-5p	1	SCN2B
hsa-miR-1207-5p	1	C1QTNF6
hsa-miR-1207-5p	1	FAM101A
hsa-miR-1207-5p	1	MLXIP
hsa-miR-1207-5p	1	MNT
hsa-miR-1207-5p	1	CD276
hsa-miR-1207-5p	1	LY6E
hsa-miR-1207-5p	1	ITM2C
hsa-miR-1207-5p	1	FAM203A
hsa-miR-1207-5p	1	BCL7B
hsa-miR-1207-5p	1	KLF16
hsa-miR-1207-5p	1	UBALD1
hsa-miR-1207-5p	1	BCL2L13
hsa-miR-1207-5p	1	FAM53B
hsa-miR-1207-5p	1	AC091801.1
hsa-miR-1207-5p	1	RAB1B
hsa-miR-1207-5p	1	TMA7
hsa-miR-1207-5p	1	SLC6A17
hsa-miR-1207-5p	1	RARA
hsa-miR-1207-5p	1	TINF2
hsa-miR-1207-5p	1	TSPAN9
hsa-miR-1207-5p	1	SLC2A6
hsa-miR-1207-5p	1	PITPNM2
hsa-miR-1207-5p	1	PHF15
hsa-miR-1207-5p	1	SFRP5
hsa-miR-1207-5p	1	PAX2
hsa-miR-1207-5p	1	TRIM46
hsa-miR-1207-5p	1	PGLYRP2
hsa-miR-1207-5p	1	ARF3
hsa-miR-1207-5p	1	POM121L12
hsa-miR-1207-5p	1	KRTAP10-9
hsa-miR-1207-5p	1	SYNGR1
hsa-miR-1207-5p	1	LYNX1
hsa-miR-1207-5p	1	TMEM105
hsa-miR-1207-5p	1	RP11-644F5.10
hsa-miR-1207-5p	1	CLDN19
hsa-miR-1207-5p	1	B4GALNT1
hsa-miR-1207-5p	1	SYNDIG1L
hsa-miR-1207-5p	1	UNC13D
hsa-miR-1207-5p	1	RAB15
hsa-miR-1207-5p	1	TUBB4A
hsa-miR-1207-5p	1	ITPKB
hsa-miR-1207-5p	1	TRAPPC1
hsa-miR-1207-5p	1	ALX4
hsa-miR-1207-5p	1	PYCR2
hsa-miR-1207-5p	1	MDGA1
hsa-miR-1207-5p	1	TEAD3
hsa-miR-1207-5p	1	GUCA2A
hsa-miR-1207-5p	1	PPP1R1A
hsa-miR-1207-5p	1	C12orf77
hsa-miR-1207-5p	1	UGT3A1
hsa-miR-1207-5p	1	FXYD5
hsa-miR-1207-5p	1	SIGIRR
hsa-miR-1207-5p	1	RP11-114H20.1
hsa-miR-1207-5p	1	CRHR1
hsa-miR-1207-5p	1	RP11-363G10.2
hsa-miR-1207-5p	1	COPZ1
hsa-miR-1207-5p	1	FAM203B
hsa-miR-1207-5p	1	SYNGR3
hsa-miR-6721-5p
hsa-miR-6721-5p	1	FAM83F
hsa-miR-6721-5p	1	KMT2D
hsa-miR-6721-5p	1	C10orf91
hsa-miR-6721-5p	1	NPLOC4
hsa-miR-6721-5p	1	SPRN
hsa-miR-6721-5p	1	C17orf103
hsa-miR-6721-5p	1	SIX5
hsa-miR-6721-5p	1	C1QTNF6
hsa-miR-6721-5p	1	PRM2
hsa-miR-6721-5p	1	TBC1D13
hsa-miR-6721-5p	1	PRX
hsa-miR-6721-5p	1	PDE6G
hsa-miR-6721-5p	1	TFE3
hsa-miR-6721-5p	1	MAP1LC3A
hsa-miR-6721-5p	1	PDPK1
hsa-miR-6721-5p	1	ARC
hsa-miR-6721-5p	1	RAB1B
hsa-miR-6721-5p	1	GUCD1
hsa-miR-6721-5p	1	CYP4A11
hsa-miR-6721-5p	1	GPR37L1
hsa-miR-6721-5p	1	SYNDIG1L
hsa-miR-6721-5p	1	LDLRAD2
hsa-miR-6721-5p	1	LZTS3
hsa-miR-6721-5p	1	SERINC2
hsa-miR-6721-5p	1	ZFP36L1
hsa-miR-6721-5p	1	SLC9A3R2
hsa-miR-6721-5p	1	NPTXR
hsa-miR-6721-5p	1	SLC6A9
hsa-miR-6721-5p	1	TPBGL
hsa-miR-6721-5p	1	FAM195B
hsa-miR-6721-5p	1	PITPNM2
hsa-miR-6721-5p	1	SLC22A8
hsa-miR-6721-5p	1	LY6E
hsa-miR-6721-5p	1	STX1A
hsa-miR-6721-5p	1	PML
hsa-miR-6721-5p	1	FASTK
hsa-miR-6721-5p	1	AL133373.1
hsa-miR-6721-5p	1	PAQR4
hsa-miR-6721-5p	1	CYP4A22
hsa-miR-6721-5p	1	PFKL
hsa-miR-6721-5p	1	MED22
hsa-miR-6721-5p	1	RSPO4
hsa-miR-6721-5p	1	PAX4
hsa-miR-6721-5p	1	FLJ27365
hsa-miR-6721-5p	1	FAM222B
hsa-miR-6721-5p	1	PIRT
hsa-miR-6721-5p	1	PVRL1
hsa-miR-6721-5p	1	CDK16
hsa-miR-6721-5p	1	ULK1
hsa-miR-6721-5p	1	FDX1L
hsa-miR-6721-5p	1	IKBKG
hsa-miR-6721-5p	1	AL645730.2
hsa-miR-6721-5p	1	PHYHIP
hsa-miR-6721-5p	1	SLC7A5
hsa-miR-6721-5p	1	SARS
hsa-miR-6721-5p	1	LMX1B
hsa-miR-6721-5p	1	C1orf35
hsa-miR-6721-5p	1	ZNF512B
hsa-miR-6721-5p	1	PARP3
hsa-miR-6721-5p	1	MAFG
hsa-miR-6721-5p	1	LHPP
hsa-miR-6721-5p	1	TEX35
hsa-miR-6721-5p	1	CACNA1I
hsa-miR-6721-5p	1	RP11-644F5.10
hsa-miR-6721-5p	1	REXO1L1
hsa-miR-6721-5p	1	TRIM62
hsa-miR-6721-5p	1	DAB2IP
hsa-miR-6721-5p	1	VGLL2
hsa-miR-6721-5p	1	MYO1C
hsa-miR-6721-5p	1	STK35
hsa-miR-6721-5p	1	SYNGR1
hsa-miR-6721-5p	1	XYLT1
hsa-miR-6721-5p	1	ARHGAP19-SLIT1
hsa-miR-6721-5p	1	C9orf16
hsa-miR-6721-5p	1	GP1BB
hsa-miR-6721-5p	1	CSF1
hsa-miR-6721-5p	1	DBNDD1
hsa-miR-6721-5p	1	SLC6A17
hsa-miR-6721-5p	1	PATE3
hsa-miR-6721-5p	1	FLJ45079
hsa-miR-6721-5p	1	C7orf65
hsa-miR-6721-5p	1	PKN1
hsa-miR-6721-5p	1	RGS11
hsa-miR-6721-5p	1	TRAPPC1
hsa-miR-6721-5p	1	TLN1
hsa-miR-6721-5p	1	SYT2
hsa-miR-6721-5p	1	HAAO
hsa-miR-6721-5p	1	SMIM3
hsa-miR-6721-5p	1	AL589765.1
hsa-miR-6721-5p	1	LRTM2
hsa-miR-6721-5p	1	NR6A1
hsa-miR-6721-5p	1	CISH
hsa-miR-6721-5p	1	POU2F1
hsa-miR-6721-5p	1	CSRNP1
hsa-miR-6721-5p	1	SPOCD1
hsa-miR-6721-5p	1	LASP1
hsa-miR-6721-5p	1	ATXN7L3
hsa-miR-6721-5p	1	VPS53
hsa-miR-6721-5p	1	ISY1-RAB43
hsa-miR-6721-5p	1	INF2
hsa-miR-4752
hsa-miR-4752	1	GLT8D2
hsa-miR-4752	1	S100Z
hsa-miR-4752	1	ASB15
hsa-miR-4752	1	HSPBAP1
hsa-miR-4752	1	PCP4
hsa-miR-4752	1	CALML4
hsa-miR-4752	1	ZNF732
hsa-miR-4752	1	ARL10
hsa-miR-4752	1	RP11-497E19.2
hsa-miR-4752	1	AL136115.1
hsa-miR-4752	1	CCDC179
hsa-miR-4752	1	RGS4
hsa-miR-4752	1	DPT
hsa-miR-4752	1	FMOD
hsa-miR-4752	1	CCL8
hsa-miR-4752	1	RP11-315D16.2
hsa-miR-4752	1	ZNF23
hsa-miR-4752	1	MEF2BNB-MEF2B
hsa-miR-4752	1	C4orf45
hsa-miR-4752	1	CETN2
hsa-miR-4752	1	ZNF233
hsa-miR-4752	1	KCTD16
hsa-miR-4752	1	SCAI
hsa-miR-4752	1	PRNT
hsa-miR-4752	1	KRTAP26-1
hsa-miR-4752	1	NUDT17
hsa-miR-4752	1	SNUPN
hsa-miR-4752	1	RP11-817J15.3
hsa-miR-4752	1	KRTAP1-5
hsa-miR-4752	1	ERMN
hsa-miR-4752	1	ANXA11
hsa-miR-4752	1	BECN1
hsa-miR-4752	1	ZNF561
hsa-miR-4752	1	FAM92A1
hsa-miR-4752	1	DKK4
hsa-miR-4752	1	ZCCHC18
hsa-miR-4752	1	CRK
hsa-miR-4752	1	GATS
hsa-miR-4752	1	LIX1
hsa-miR-4752	1	C10orf25
hsa-miR-4752	1	GLRX
hsa-miR-4752	1	PJA1
hsa-miR-4752	1	HCK
hsa-miR-4752	1	ZNF225
hsa-miR-4752	1	ZCCHC12
hsa-miR-4752	1	FOLR3
hsa-miR-4752	1	TMEM217
hsa-miR-4752	1	APEX1
hsa-miR-4752	1	NEDD4
hsa-miR-4752	1	GCFC2
hsa-miR-4752	1	ZFP36L1
hsa-miR-4752	1	TCAIM
hsa-miR-4752	1	ACLY
hsa-miR-4752	1	VTCN1
hsa-miR-4752	1	MS4A1
hsa-miR-4752	1	PHACTR4
hsa-miR-4752	1	C12orf4
hsa-miR-4752	1	P2RY13
hsa-miR-4752	1	MTRNR2L1
hsa-miR-4752	1	E2F5
hsa-miR-4752	1	MAF
hsa-miR-4752	1	SLC36A2
hsa-miR-4752	1	EIF4E
hsa-miR-4752	1	ZNF83
hsa-miR-4752	1	SERTM1
hsa-miR-4752	1	MEF2B
hsa-miR-4752	1	AREL1
hsa-miR-4752	1	MIXL1
hsa-miR-4752	1	PDAP1
hsa-miR-4752	1	FCF1
hsa-miR-4752	1	TRAPPC8
hsa-miR-4752	1	DHCR24
hsa-miR-4752	1	UBE2G1
hsa-miR-4752	1	NDRG3
hsa-miR-4752	1	PSAT1
hsa-miR-4752	1	ZNF791
hsa-miR-4752	1	LMAN2L
hsa-miR-4752	1	GDF10
hsa-miR-4752	1	C1QTNF3
hsa-miR-4752	1	KPRP
hsa-miR-4752	1	SHISA3
hsa-miR-4752	1	CRISP1
hsa-miR-4752	1	ZNF442
hsa-miR-4752	1	RAD23B
hsa-miR-4752	1	FRG2B
hsa-miR-4752	1	FRG2
hsa-miR-4752	1	MRPL50
hsa-miR-4752	1	FUT11
hsa-miR-4752	1	CYP3A5
hsa-miR-4752	1	SLC35A5
hsa-miR-4752	1	LIFR
hsa-miR-4752	1	AMPH
hsa-miR-4752	1	ADIPOQ
hsa-miR-4752	1	TRAM2
hsa-miR-4752	1	HHLA2
hsa-miR-4752	1	SLC6A13
hsa-miR-4752	1	GABRB3
hsa-miR-4752	1	LPP
hsa-miR-4752	1	FIGN
hsa-miR-4752	1	NUDT13

## Sheet: Table S10
source	type	target
hsa-miR-6827-5p
hsa-miR-6827-5p	1	LY6G6C
hsa-miR-6827-5p	1	C6orf223
hsa-miR-6827-5p	1	AC010327.2
hsa-miR-6827-5p	1	ARL15
hsa-miR-6827-5p	1	C10orf105
hsa-miR-6827-5p	1	AC110781.3
hsa-miR-6827-5p	1	PSG4
hsa-miR-6827-5p	1	MBD3
hsa-miR-6827-5p	1	SCIMP
hsa-miR-6827-5p	1	TPPP
hsa-miR-6827-5p	1	HMGA1
hsa-miR-6827-5p	1	NKX2-5
hsa-miR-6827-5p	1	LRTM2
hsa-miR-6827-5p	1	C14orf180
hsa-miR-6827-5p	1	TH
hsa-miR-6827-5p	1	NDUFA3
hsa-miR-6827-5p	1	IL1RN
hsa-miR-6827-5p	1	MYLPF
hsa-miR-6827-5p	1	PARP10
hsa-miR-6827-5p	1	ZDHHC18
hsa-miR-6827-5p	1	C14orf144
hsa-miR-6827-5p	1	PITPNM3
hsa-miR-6827-5p	1	NPLOC4
hsa-miR-6827-5p	1	POLL
hsa-miR-6827-5p	1	FBXL12
hsa-miR-6827-5p	1	POLD4
hsa-miR-6827-5p	1	LRTOMT
hsa-miR-6827-5p	1	GAB4
hsa-miR-6827-5p	1	C22orf46
hsa-miR-6827-5p	1	HSP90AB1
hsa-miR-6827-5p	1	CSMD2
hsa-miR-6827-5p	1	FOXP4
hsa-miR-6827-5p	1	TNFSF13
hsa-miR-6827-5p	1	RBFOX3
hsa-miR-6827-5p	1	STX12
hsa-miR-6827-5p	1	FAM213B
hsa-miR-6827-5p	1	DBF4B
hsa-miR-6827-5p	1	HNF4A
hsa-miR-6827-5p	1	NDUFS7
hsa-miR-6827-5p	1	NDUFAF2
hsa-miR-6827-5p	1	AL020996.1
hsa-miR-6827-5p	1	SMCR8
hsa-miR-6827-5p	1	SCN2B
hsa-miR-6827-5p	1	PPP1R14B
hsa-miR-6827-5p	1	OBP2A
hsa-miR-6827-5p	1	CTSO
hsa-miR-6827-5p	1	PPCS
hsa-miR-6827-5p	1	CHRNA2
hsa-miR-6827-5p	1	NELFB
hsa-miR-6827-5p	1	KIAA1211
hsa-miR-6827-5p	1	FBXO16
hsa-miR-6827-5p	1	GPR37L1
hsa-miR-6827-5p	1	ATP6V0E2
hsa-miR-6827-5p	1	BGN
hsa-miR-6827-5p	1	DUSP15
hsa-miR-6827-5p	1	MTMR11
hsa-miR-6827-5p	1	RBPMS2
hsa-miR-6827-5p	1	LAD1
hsa-miR-6827-5p	1	PPP2R4
hsa-miR-6827-5p	1	NOS1AP
hsa-miR-6827-5p	1	POLH
hsa-miR-6827-5p	1	C14orf1
hsa-miR-6827-5p	1	PEPD
hsa-miR-6827-5p	1	FAM89B
hsa-miR-6827-5p	1	UBL4B
hsa-miR-6827-5p	1	RHOC
hsa-miR-6827-5p	1	KAT8
hsa-miR-6827-5p	1	CYB561
hsa-miR-6827-5p	1	CSRP1
hsa-miR-6827-5p	1	CDCA4
hsa-miR-6827-5p	1	C1orf86
hsa-miR-6827-5p	1	COTL1
hsa-miR-6827-5p	1	COL1A1
hsa-miR-6827-5p	1	FMO2
hsa-miR-6827-5p	1	OSGIN1
hsa-miR-6827-5p	1	NGEF
hsa-miR-6827-5p	1	C1QTNF1
hsa-miR-6827-5p	1	SYNGR2
hsa-miR-6827-5p	1	ESAM
hsa-miR-6827-5p	1	MCAM
hsa-miR-6827-5p	1	C17orf66
hsa-miR-6827-5p	1	ZMYND19
hsa-miR-6827-5p	1	SNX12
hsa-miR-6827-5p	1	PRSS8
hsa-miR-6827-5p	1	RARG
hsa-miR-6827-5p	1	C19orf10
hsa-miR-6827-5p	1	EVA1B
hsa-miR-6827-5p	1	HIST2H3A
hsa-miR-6827-5p	1	HIST2H3C
hsa-miR-6827-5p	1	TEX35
hsa-miR-6827-5p	1	IL2RB
hsa-miR-6827-5p	1	C10orf55
hsa-miR-6827-5p	1	TIMM8A
hsa-miR-6827-5p	1	C12orf44
hsa-miR-6827-5p	1	TSC22D3
hsa-miR-6827-5p	1	VIMP
hsa-miR-6827-5p	1	GAL3ST3
hsa-miR-6827-5p	1	PGAM1
hsa-miR-6827-5p	1	BLOC1S1
hsa-miR-6827-5p	1	HOXB5
hsa-miR-939-5p
hsa-miR-939-5p	1	C6orf223
hsa-miR-939-5p	1	FOXP4
hsa-miR-939-5p	1	C10orf105
hsa-miR-939-5p	1	KRTAP10-5
hsa-miR-939-5p	1	KRTAP10-1
hsa-miR-939-5p	1	PRX
hsa-miR-939-5p	1	GRIK3
hsa-miR-939-5p	1	CIB2
hsa-miR-939-5p	1	STIM1
hsa-miR-939-5p	1	TBC1D13
hsa-miR-939-5p	1	SIX5
hsa-miR-939-5p	1	ARID3B
hsa-miR-939-5p	1	PFN1
hsa-miR-939-5p	1	CDR2L
hsa-miR-939-5p	1	AC105020.1
hsa-miR-939-5p	1	VEGFA
hsa-miR-939-5p	1	LY6G6C
hsa-miR-939-5p	1	KRT3
hsa-miR-939-5p	1	ZNF385A
hsa-miR-939-5p	1	CLDN9
hsa-miR-939-5p	1	MN1
hsa-miR-939-5p	1	ADRB3
hsa-miR-939-5p	1	UBL4B
hsa-miR-939-5p	1	TNF
hsa-miR-939-5p	1	CACNG7
hsa-miR-939-5p	1	TIMP2
hsa-miR-939-5p	1	FAM106A
hsa-miR-939-5p	1	KSR2
hsa-miR-939-5p	1	KCNC3
hsa-miR-939-5p	1	CLCF1
hsa-miR-939-5p	1	DUSP3
hsa-miR-939-5p	1	PPP1R9B
hsa-miR-939-5p	1	NFASC
hsa-miR-939-5p	1	DACT3
hsa-miR-939-5p	1	OAF
hsa-miR-939-5p	1	LIMD2
hsa-miR-939-5p	1	CYB561A3
hsa-miR-939-5p	1	TYROBP
hsa-miR-939-5p	1	CTRB1
hsa-miR-939-5p	1	CYP2W1
hsa-miR-939-5p	1	RARA
hsa-miR-939-5p	1	NAT16
hsa-miR-939-5p	1	SSTR5
hsa-miR-939-5p	1	VAMP2
hsa-miR-939-5p	1	ELAVL3
hsa-miR-939-5p	1	TNFRSF18
hsa-miR-939-5p	1	C14orf164
hsa-miR-939-5p	1	SLC5A2
hsa-miR-939-5p	1	JOSD2
hsa-miR-939-5p	1	AC174470.1
hsa-miR-939-5p	1	RPS11
hsa-miR-939-5p	1	IL2RB
hsa-miR-939-5p	1	AC074212.3
hsa-miR-939-5p	1	TMEM222
hsa-miR-939-5p	1	FHL3
hsa-miR-939-5p	1	FAM134C
hsa-miR-939-5p	1	C17orf77
hsa-miR-939-5p	1	RP11-176H8.1
hsa-miR-939-5p	1	AL627309.1
hsa-miR-939-5p	1	CPLX2
hsa-miR-939-5p	1	IK
hsa-miR-939-5p	1	SYCE2
hsa-miR-939-5p	1	ATPAF2
hsa-miR-939-5p	1	MOB3B
hsa-miR-939-5p	1	SPDEF
hsa-miR-939-5p	1	KMT2D
hsa-miR-939-5p	1	C11orf45
hsa-miR-939-5p	1	C19orf33
hsa-miR-939-5p	1	HRK
hsa-miR-939-5p	1	RP11-268J15.5
hsa-miR-939-5p	1	MS4A15
hsa-miR-939-5p	1	C17orf102
hsa-miR-939-5p	1	SPRYD3
hsa-miR-939-5p	1	GSTM5
hsa-miR-939-5p	1	CTXN2
hsa-miR-939-5p	1	WNT7A
hsa-miR-939-5p	1	LCN1
hsa-miR-939-5p	1	SPSB4
hsa-miR-939-5p	1	SIAH3
hsa-miR-939-5p	1	HMGA1
hsa-miR-939-5p	1	ZBTB4
hsa-miR-939-5p	1	RBP2
hsa-miR-939-5p	1	CTB-54O9.9
hsa-miR-939-5p	1	DENND6B
hsa-miR-939-5p	1	LDOC1L
hsa-miR-939-5p	1	SCAMP4
hsa-miR-939-5p	1	TMEM151B
hsa-miR-939-5p	1	C1orf86
hsa-miR-939-5p	1	SLC39A13
hsa-miR-939-5p	1	CTRC
hsa-miR-939-5p	1	FOXP3
hsa-miR-939-5p	1	GJD3
hsa-miR-939-5p	1	SLC52A2
hsa-miR-939-5p	1	DKK3
hsa-miR-939-5p	1	RANBP10
hsa-miR-939-5p	1	FAM205A
hsa-miR-939-5p	1	FAM83G
hsa-miR-939-5p	1	CELF1
hsa-miR-939-5p	1	CTB-102L5.4
hsa-miR-939-5p	1	C3orf72
hsa-miR-4723-5p
hsa-miR-4723-5p	1	KIR3DX1
hsa-miR-4723-5p	1	KCNC3
hsa-miR-4723-5p	1	C6orf223
hsa-miR-4723-5p	1	PAX5
hsa-miR-4723-5p	1	FOXP4
hsa-miR-4723-5p	1	PPP1R9B
hsa-miR-4723-5p	1	MTSS1L
hsa-miR-4723-5p	1	PDX1
hsa-miR-4723-5p	1	VAMP2
hsa-miR-4723-5p	1	SLC6A17
hsa-miR-4723-5p	1	MINK1
hsa-miR-4723-5p	1	ATN1
hsa-miR-4723-5p	1	NAT16
hsa-miR-4723-5p	1	NFIC
hsa-miR-4723-5p	1	URM1
hsa-miR-4723-5p	1	HRK
hsa-miR-4723-5p	1	ATXN1L
hsa-miR-4723-5p	1	ANKRD52
hsa-miR-4723-5p	1	SLC28A1
hsa-miR-4723-5p	1	NOVA2
hsa-miR-4723-5p	1	DKFZP434E1119
hsa-miR-4723-5p	1	ELK1
hsa-miR-4723-5p	1	HMGA1
hsa-miR-4723-5p	1	SH3PXD2A
hsa-miR-4723-5p	1	RNASE13
hsa-miR-4723-5p	1	TRAM2
hsa-miR-4723-5p	1	PACS1
hsa-miR-4723-5p	1	ZFP36L1
hsa-miR-4723-5p	1	ZBTB7A
hsa-miR-4723-5p	1	ZBED3
hsa-miR-4723-5p	1	MPZ
hsa-miR-4723-5p	1	FAM131B
hsa-miR-4723-5p	1	LURAP1
hsa-miR-4723-5p	1	CADM4
hsa-miR-4723-5p	1	UBTF
hsa-miR-4723-5p	1	XKR7
hsa-miR-4723-5p	1	C17orf96
hsa-miR-4723-5p	1	MAP1A
hsa-miR-4723-5p	1	ELAVL3
hsa-miR-4723-5p	1	UBAP2L
hsa-miR-4723-5p	1	AC007405.2
hsa-miR-4723-5p	1	SLC8A2
hsa-miR-4723-5p	1	PDE4A
hsa-miR-4723-5p	1	MUC3A
hsa-miR-4723-5p	1	SAMD14
hsa-miR-4723-5p	1	KRTAP10-10
hsa-miR-4723-5p	1	NR1D1
hsa-miR-4723-5p	1	APLNR
hsa-miR-4723-5p	1	KMT2D
hsa-miR-4723-5p	1	SPRED3
hsa-miR-4723-5p	1	ATP6V0E2
hsa-miR-4723-5p	1	SH3BGRL3
hsa-miR-4723-5p	1	SLC7A8
hsa-miR-4723-5p	1	ID1
hsa-miR-4723-5p	1	CNIH2
hsa-miR-4723-5p	1	BLOC1S1
hsa-miR-4723-5p	1	PVRL1
hsa-miR-4723-5p	1	RSPO4
hsa-miR-4723-5p	1	WNT7B
hsa-miR-4723-5p	1	NFASC
hsa-miR-4723-5p	1	BCL7A
hsa-miR-4723-5p	1	NUDT18
hsa-miR-4723-5p	1	AP2M1
hsa-miR-4723-5p	1	SLC9A1
hsa-miR-4723-5p	1	EPB41L1
hsa-miR-4723-5p	1	MIDN
hsa-miR-4723-5p	1	MNT
hsa-miR-4723-5p	1	C9orf62
hsa-miR-4723-5p	1	PRKACA
hsa-miR-4723-5p	1	MKLN1
hsa-miR-4723-5p	1	SYNGAP1
hsa-miR-4723-5p	1	SLC9A3R2
hsa-miR-4723-5p	1	FBXO10
hsa-miR-4723-5p	1	FOXE1
hsa-miR-4723-5p	1	ABTB2
hsa-miR-4723-5p	1	SNX29
hsa-miR-4723-5p	1	C1orf106
hsa-miR-4723-5p	1	KIAA1644
hsa-miR-4723-5p	1	CBFA2T3
hsa-miR-4723-5p	1	PLA2G2D
hsa-miR-4723-5p	1	DIRAS1
hsa-miR-4723-5p	1	APLN
hsa-miR-4723-5p	1	SEMA6B
hsa-miR-4723-5p	1	BET1L
hsa-miR-4723-5p	1	SLC25A45
hsa-miR-4723-5p	1	CDK18
hsa-miR-4723-5p	1	C12orf68
hsa-miR-4723-5p	1	THRA
hsa-miR-4723-5p	1	UBXN7
hsa-miR-4723-5p	1	MKNK2
hsa-miR-4723-5p	1	GJB4
hsa-miR-4723-5p	1	ABL1
hsa-miR-4723-5p	1	NFIX
hsa-miR-4723-5p	1	MFRP
hsa-miR-4723-5p	1	CES3
hsa-miR-4723-5p	1	SMARCC2
hsa-miR-4723-5p	1	PRX
hsa-miR-4723-5p	1	PSAP
hsa-miR-4723-5p	1	GPR108
hsa-miR-4723-5p	1	ITFG3
